# Supplementary material for: Characterisation of the biflavonoid hinokiflavone as a pre-mRNA splicing modulator that inhibits SENP
Source: eLife. 2017 Sep 8;6:e27402. doi: 10.7554/eLife.27402 (PMC5619949; doi:10.7554/eLife.27402)
Supplement: Supplementary file 1. — Corresponding gene and protein names are indicated for each lysine. [file elife-27402-supp1.xlsx]

## Sheet: Supplementary File 1
id	Gene names	Protein names	Position	Normalised ratio Hinokiflavone/DMSO (single diGly-Lys per peptide)	Normalised ratio Hinokiflavone/DMSO (two diGly-Lys per peptide)	Sequence window	Modified sequence	Localization prob.	Score	PEP	Mass error [ppm]	Intensity (DMSO)	Intensity (Hinokiflavone)
1	ABCE1;ABCE1;ABCE1;ABCE1	ATP-binding cassette sub-family E member 1	165	0.588124		SELQNYFTKILEDDLKAIIKPQYVDQIPKAA	_DDLK(gl)AIIK_	1	74.841	0.0293746	0.44379	1428600	398850
2	ABCF3	ATP-binding cassette sub-family F member 3	111			ITENYDCGTKLPGLLKREQSSTVNAKKLEKA	_LPGLLK(gl)REQSSTVNAK_	1	52.522	0.00658078	0.515	671000	0
3	ABLIM1;ABLIM1;ABLIM1;ABLIM1;ABLIM1;ABLIM1	Actin-binding LIM protein 1	614			HAALAAQSKSSEDIIKFSKFPAAQAPDPSET	_SSEDIIK(gl)FSK_	1	45.939	0.0337532	0.055235	93209000	0
4	ACIN1;ACIN1;ACIN1	Apoptotic chromatin condensation inducer in the nucleus	879	0.871673		ISITTESLKSLIPDIKPLAGQEAVVDLHADD	_SLIPDIK(gl)PLAGQE_	1	63.76	0.00125422	-0.04272	2449100	1155500
5	ACP1	Low molecular weight phosphotyrosine protein phosphatase	113			RDLNRKSNQVKTCKAKIELLGSYDPQKQLII	_AK(gl)IELLGSYDPQK_	1	50.659	0.00950102	0.012328	0	0
6	ACTB;ACTG1;ACTA2;ACTC1;ACTA1;ACTG2;ACTA1;ACTA1;ACTA1	Actin, cytoplasmic 1;Actin, cytoplasmic 1, N-terminally processed;Actin, cytoplasmic 2;Actin, cytoplasmic 2, N-terminally processed;Actin, aortic smooth muscle;Actin, alpha cardiac muscle 1;Actin, alpha skeletal muscle;Actin, gamma-enteric smooth muscle	326			DRMQKEITALAPSTMKIKSASTRCGSVAPSW	_ITALAPSTM(ox)K(gl)IK_	1	78.744	0.000885635	0.14898	2862000	0
7	ACTB;ACTG1;ACTA2;ACTC1;ACTA1;ACTG2;ACTA1;ACTA1;ACTA1;ACTB;ACTB;ACTA2;ACTA2;ACTG2;ACTG2;ACTG2;ACTB;ACTB;ACTB	Actin, cytoplasmic 1;Actin, cytoplasmic 1, N-terminally processed;Actin, cytoplasmic 2;Actin, cytoplasmic 2, N-terminally processed;Actin, aortic smooth muscle;Actin, alpha cardiac muscle 1;Actin, alpha skeletal muscle;Actin, gamma-enteric smooth muscle	61	0.480287		GMGQKDSYVGDEAQSKRGILTLKYPIEHGIV	_DSYVGDEAQSK(gl)RGILTLK_	1	152.71	1.33e-15	1.4885	19059000	3908500
8	ACTB;ACTG1;ACTB;ACTB	Actin, cytoplasmic 1;Actin, cytoplasmic 1, N-terminally processed;Actin, cytoplasmic 2;Actin, cytoplasmic 2, N-terminally processed	113	0.245741		PEEHPVLLTEAPLNPKANREKMTQIMFETFN	_LRVAPEEHPVLLTEAPLNPK(gl)ANREK_	1	186.75	3.34e-26	0.37819	6276600	762690
9	ADAR;ADAR;ADAR	Double-stranded RNA-specific adenosine deaminase	461	0.680586		MVTTEKVENGQEPVIKLENRQEARPEPARLK	_VENGQEPVIK(gl)LE_	1	84.365	0.000536571	0.24441	9235100	3802300
10	ADAR;ADAR;ADAR	Double-stranded RNA-specific adenosine deaminase	451			NIPTSNASNNMVTTEKVENGQEPVIKLENRQ	_K(gl)VEN(de)GQEPVIK(gl)LE_	1	48.823	0.0176	-0.021479	739600	0
11	AHSA1;AHSA1;AHSA1;AHSA1	Activator of 90 kDa heat shock protein ATPase homolog 1	182			TMNGESVDPVGQPALKTEERKAKPAPSKTQA	_PVGQPALK(gl)TEE_	1	31.431	0.0427338	0.27475	0	0
12	ALDOA;ALDOA;ALDOA;ALDOA	Fructose-bisphosphate aldolase A;Fructose-bisphosphate aldolase	42	0.375307		GKGILAADESTGSIAKRLQSIGTENTEENRR	_STGSIAK(gl)RLQSIGTENTEE_	1	68.129	7.09e-05	0.18391	5512200	1062900
13	ANP32E;ANP32E;ANP32E	Acidic leucine-rich nuclear phosphoprotein 32 family member E	113			NKIKDLSTVEALQNLKNLKSLDLFNCEITNL	_DLSTVEALQNLK(gl)NLK_	1	75.462	0.000163569	0.19694	2583900	0
14	ANP32E;ANP32E;ANP32E;ANP32E	Acidic leucine-rich nuclear phosphoprotein 32 family member E	65	0.377824		ANVELSSLARLPSLNKLRKLELSDNIISGGL	_LSSLARLPSLNK(gl)LRK_	1	63.894	0.00386934	-0.074604	845370	185270
15	ANP32E;ANP32E;ANP32E;ANP32E	Acidic leucine-rich nuclear phosphoprotein 32 family member E	68			ELSSLARLPSLNKLRKLELSDNIISGGLEVL	_LRK(gl)LELSDNIISGGLEVLAEK_	1	46.178	0.00147258	1.3081	910840	0
16	ANP32E;ANP32E;ANP32E;ANP32E;ANP32E	Acidic leucine-rich nuclear phosphoprotein 32 family member E	223	0.427253		ELGEGEEEVGLSYLMKEEIQDEEDDDDYVEE	_VGLSYLMK(gl)EE_	1	51.436	0.00727685	-0.2146	32727000	7232800
17	ARCN1;ARCN1	Coatomer subunit delta	284			LGAKGKEVDNFVDKLKSEGETIMSSSMGKRT	_LK(gl)SEGETIM(ox)SSSM(ox)GK_	1	61.127	0.0378572	0.04796	0	0
18	ARHGAP8;ARHGAP8;ARHGAP8;PRR5;PRR5;PRR5;PRR5;PRR5;PRR5	Proline-rich protein 5	76	0.369784		DQELFSLNEGVRQLLKTELGSFFTEYLQNQL	_GVRQ(de)LLK(gl)TE_	1	52.247	0.00588	0.1067	867950	139810
19	ARHGDIA;ARHGDIA	Rho GDP-dissociation inhibitor 1	33	0.479754		NEEDEHSVNYKPPAQKSIQEIQELDKDDESL	_HSVNYKPPAQK(gl)SIQE_	0.998135	60.55	0.00698317	0.78973	1155400	112390
20	ARID4B	AT-rich interactive domain-containing protein 4B	517	0.43638		DKDDDTTRVDESLNIKVEAEEEKAKSGDETN	_SLNIK(gl)VE_	1	78.149	0.0393058	-0.38554	26452000	6166300
21	ATF3;ATF3	Cyclic AMP-dependent transcription factor ATF-3	42	0.513062		GSLVFEDFANLTPFVKEELRFAIQNKHLCHR	_DFANLTPFVK(gl)EE_	1	47.915	0.0102799	-0.24241	5226900	1583000
22	ATF3;ATF3;ATF3	Cyclic AMP-dependent transcription factor ATF-3	78	0.541999		ESVTVSDRPLGVSITKAEVAPEEDERKKRRR	_SVTVSDRPLGVSITK(gl)AE_	1	40.493	0.00871669	0.45794	5373200	1762600
23	ATP5S;ATP5S	ATP synthase subunit s, mitochondrial	125	0.600065		EDDCLLRLSQLENLQKTILEMEIISCGNITD	_NLQK(gl)TILE_	1	50.04	0.0175724	-0.063367	3030900	918530
24	ATRX	Transcriptional regulator ATRX	1982	4.95107		EGNVDETGNNPSVSLKLEESKATSSSNPSSP	_TGNNPSVSLK(gl)LEE_	1	48.527	0.00384	0.14478	1681600	4579700
25	BAZ1B	Tyrosine-protein kinase BAZ1B	826	0.400171		VENGLGKTDRKKEIVKFEPQVDTEAEDMISA	_IVK(gl)FEPQVDTE_	1	68.069	0.00178396	0.5307	1429200	236470
26	BCL11A;BCL11A;BCL11A	B-cell lymphoma/leukemia 11A	471	0.56569		VGSASSALKSVVAKFKSENDPNLIPENGDEE	_FK(gl)SENDPNLIPE_	1	51.875	0.00706663	0.85218	1602700	312640
27	BCL11B;BCL11B	B-cell lymphoma/leukemia 11B	887	1.22826		HMKKWHGEHLLTNDVKIEQAERS________	_HLLTNDVK(gl)IE_	1	93.096	0.00206065	0.093068	768970	553850
28	BCL7A	B-cell CLL/lymphoma 7 protein family member A	220			GLSGDLEGVPPSKKMKLEASQQNSEEM____	_M(ox)K(gl)LEASQQNSEEM(ox)_	1	71.241	0.00275329	1.2241	1180800	0
29	BCLAF1;BCLAF1;BCLAF1;BCLAF1;BCLAF1	Bcl-2-associated transcription factor 1	501	1.40083		ERITVKKETQSPEQVKSEKLKDLFDYSPPLH	_ET(ph)QSPEQVK(gl)SEK_	1	84.169	0.000727057	0.74827	10892000	3619600
30	BCLAF1;BCLAF1;BCLAF1;BCLAF1;BCLAF1	Bcl-2-associated transcription factor 1	676	0.926625		TLRKHTRLAGEERVFKEENQKGDKKLRCDSA	_HTRLAGEERVFK(gl)EENQK_	1	121.82	4.8e-10	-0.074975	58899000	26399000
31	BCLAF1;BCLAF1;BCLAF1;BCLAF1;BCLAF1;BCLAF1	Bcl-2-associated transcription factor 1	580	1.15976		LTKDRLLASTLVHSVKKEQEFRSIFDHIKLP	_DRLLASTLVHSVK(gl)K_	1	108.89	6.01e-08	0.026976	8591500	5155200
32	BLM;BLM;BLM	Bloom syndrome protein	331	0.807423		SKCLSTLKDLDTSDRKEDVLSTSKDLLSKPE	_DLDTSDRK(gl)EDVLSTSK_	1	142.32	5.21e-14	0.1555	9459600	3723000
33	BLM;BLM;BLM	Bloom syndrome protein	259			AEVHINEDAQESDSLKTHLEDERDNSEKKKN	_SDSLK(gl)THLE_	1	79.986	0.0335061	0.2863	445060	0
34	BMI1;BMI1;BMI1;BMI1	Polycomb complex protein BMI-1	88			KTLQDIVYKLVPGLFKNEMKRRRDFYAAHPS	_LVPGLFK(gl)NE_	1	44.863	0.0267539	0.3158	682920	0
35	BPTF;BPTF;BPTF	Nucleosome-remodeling factor subunit BPTF	752			SHTPVSIQEEIVGDFKSEKSNGELSESPGAG	_IVGDFK(gl)SEK_	1	60.628	0.0183216	0.066189	539090	0
36	BRD4	Bromodomain-containing protein 4	1111	0.340869		LRAASVVQPQPLVVVKEEKIHSPIIRSEPFS	_LRAASVVQPQPLVVVK(gl)E_	1	69.133	1.84e-05	0.37582	16891000	3257300
37	BRD7	Bromodomain-containing protein 7	127	0.493806		RLDLPPEKPLTSSLAKQEEVEQTPLQEALNQ	_PLTSSLAK(gl)QEE_	1	76.927	0.000439363	0.29846	2562000	727870
38	BRD8;BRD8;BRD8;BRD8;BRD8;BRD8;BRD8	Bromodomain-containing protein 8	575			DVAIGKGDETPLTNVKTEASPESMLSPSHGS	_GDETPLTNVK(gl)TE_	1	132.17	8.84e-17	0.036655	10228000	0
39	BRD8;BRD8;BRD8;BRD8;BRD8;BRD8;BRD8	Bromodomain-containing protein 8	509			GIHELVDIREPSAEIKVEPAEPEPVISGAEI	_IK(gl)VEPAEPEPVISGAE_	1	77.746	0.000936423	0.5233	3586200	0
40	BRMS1L;BRMS1L;BRMS1L	Breast cancer metastasis-suppressor 1-like protein	240	0.416911		TTIRKAMATLGPHRVKTEPPVKLEKHLHSAR	_AM(ox)ATLGPHRVK(gl)TEPPVK_	1	79.311	4.79e-06	-0.3666	16529000	3387600
41	BRMS1L;BRMS1L;BRMS1L	Breast cancer metastasis-suppressor 1-like protein	246	0.311889		MATLGPHRVKTEPPVKLEKHLHSARSEEGRL	_TEPPVK(gl)LEK_	1	59.225	0.00416149	-0.23366	6210200	913440
42	BZW1;BZW1;BZW1;BZW1;BZW1;BZW1	Basic leucine zipper and W2 domain-containing protein 1	40	0.487452		PQATGVSFMNNQKQQKPTLSGQRFKTRKRDE	_(gl)QQK(gl)PTLSGQRFK_	1	90.697	0.000399	0.39374	2734000	274690
43	C10orf12	Uncharacterized protein C10orf12	1018	0.399446		YSNIRGKLRAQQRLIKNEKMECPDALAVESK	_LRAQQRLIK(gl)NEK_	1	51.841	0.0195319	0.37686	4525500	1153000
44	C10orf46;C10orf46	Uncharacterized protein C10orf46	330	0.734344		PAVESELSEYAAQDQKFQRELIQNGFTRGDQ	_YAAQDQK(gl)FQRE_	1	70.488	0.0162286	-0.012196	1069100	339790
45	C14orf43;C14orf43;C14orf43	Uncharacterized protein C14orf43	42			EQPPPLQPPQQSIRVKEEQYLGHEGPGGAVS	_EQPPPLQPPQQSIRVK(gl)E_	1	62.203	0.00223802	0.3284	734020	0
46	C17orf85	Uncharacterized protein C17orf85	12	0.467983		____MAAVRGLRVSVKAEAPAGPALGLPSPE	_(ac)AAVRGLRVSVK(gl)AEAPAGPALGLPSPEAE_	1	42.454	0.000419244	0.2576	4432300	478480
47	C3orf26;C3orf26;C3orf26	Uncharacterized protein C3orf26	84			KTRKRRKKKITDVLAKSEPKPGLPEDLQKLM	_ITDVLAK(gl)SEPK_	1	62.378	0.00810522	0.22224	923410	0
48	C3orf38;C3orf38	Uncharacterized protein C3orf38	116			KQPQLKLKETPEPVTKTEDIHLFQQQVKEDK	_ETPEPVTK(gl)TE_	1	49.189	0.0268313	0.40048	567570	0
49	CALD1;CALD1;CALD1		214			EEEKPKRGSIGENQIKDEKIKKDKEPKEEVK	_RGSIGENQIK(gl)DEK_	1	75.764	0.00124036	0.4959	583720	0
50	CALR	Calreticulin	185	0.277109		HLYTLIVRPDNTYEVKIDNSQVESGSLEDDW	_VK(gl)IDNSQVE_	1	93.111	0.00405572	0.085044	4017800	751330
51	CALR	Calreticulin	55			SKHKSDFGKFVLSSGKFYGDEEKDKGLQTSQ	_FVLSSGK(gl)FYGDEEK_	1	81.311	0.000494366	1.5428	2802500	0
52	CALU	Calumenin	78	0.583006		AEEAKTFDQLTPEESKERLGKIVSKIDGDKD	_TFDQLTPEESK(gl)ERLGK_	1	112.03	7.73e-09	0.15476	9302400	1997000
53	CALU	Calumenin	181			RRFKMADKDGDLIATKEEFTAFLHPEEYDYM	_DGDLIATK(gl)EE_	1	83.862	0.00413074	0.26051	1116300	0
54	CALU	Calumenin	67			SFDYDHDAFLGAEEAKTFDQLTPEESKERLG	_AK(gl)TFDQLTPEESK_	1	76.759	0.00933876	0.42844	1738400	0
55	CALU;CALU	Calumenin	295	0.519417		HLVYESDQNKDGKLTKEEIVDKYDLFVGSQA	_LTK(gl)EEIVDK_	1	142.83	1.08e-09	0.6951	17501000	4662500
56	CANX;CANX;CANX	Calnexin	269	0.534514		AKRPDADLKTYFTDKKTHLYTLILNPDNSFE	_K(gl)THLYTLILNPDNSFE_	1	51.888	0.000990501	-0.53456	1930900	495730
57	CANX;CANX;CANX	Calnexin	318	0.339291		PPVNPSREIEDPEDRKPEDWDERPKIPDPEA	_IEDPEDRK(gl)PE_	1	111.79	0.000567217	0.011251	8939000	1592800
58	CANX;CANX;CANX;CANX;CANX	Calnexin	262	0.425931		GIYEEKHAKRPDADLKTYFTDKKTHLYTLIL	_RPDADLK(gl)TYFTDK_	1	96.773	1.36e-05	0.36793	21154000	4732500
59	CANX;CANX;CANX;CANX;CANX	Calnexin	245			GEDYKLHFIFRHKNPKTGIYEEKHAKRPDAD	_NPK(gl)TGIYEEK_	1	42.001	0.0391592	-0.64418	1177600	0
60	CANX;CANX;CANX;CANX;CANX;CANX;CANX	Calnexin	179	0.493252		HAISAKLNKPFLFDTKPLIVQYEVNFQNGIE	_TK(gl)PLIVQYE_	1	76.282	0.00364967	-0.90509	35613000	7980500
61	CANX;CANX;CANX;CANX;CANX;CANX;CANX;CANX	Calnexin	96	0.515387		KPDTTAPPSSPKVTYKAPVPTGEVYFADSFD	_VTYK(gl)APVPTGE_	1	80.245	0.000295829	-0.24832	1678200	376360
62	CANX;CANX;CANX;CANX;CANX;CANX;CANX;CANX	Calnexin	81	0.478986		IEDDLDDVIEEVEDSKPDTTAPPSSPKVTYK	_VEDSK(gl)PDTTAPPS(ph)SPK_	1	55.864	0.00647594	-0.087458	5296000	716480
63	CAPN1	Calpain-1 catalytic subunit	706			TLDTDLDGVVTFDLFKWLQLTMFA_______	_TDLDGVVTFDLFK(gl)WLQLTM(ox)FA_	1	36.856	0.00980482	-1.3956	4399300	0
64	CAPZA1	F-actin-capping protein subunit alpha-1	66			AHAFAQYNMDQFTPVKIEGYEDQVLITEHGD	_GAAHAFAQYNM(ox)DQFTPVK(gl)IE_	1	38.017	0.0353212	0.26756	639950	0
65	CBX4	E3 SUMO-protein ligase CBX4	280	1.02598		VMSKYMENGMQAVKIKSGEVAEGEARSPSHK	_IK(gl)SGEVAEGEARS(ph)PSHK_	1	71.651	0.000240796	0.37984	4070300	299080
66	CBX4	E3 SUMO-protein ligase CBX4	347	0.300075		VSGVSDPQPQDAGSRKLSPTKEAFGEQPLQL	_VSGVSDPQPQDAGSRK(gl)LS(ph)PTK_	1	92.275	5.21e-09	0.29473	1339600	185920
67	CBX4	E3 SUMO-protein ligase CBX4	212			KWAQGAGAKGYLGAVKPLAGAAGAPGKGSEK	_GYLGAVK(gl)PLAGAAGAPGK_	1	56.407	0.00129914	0.54793	1532800	0
68	CBX5;CBX5	Chromobox protein homolog 5	102			SNKRKSNFSNSADDIKSKKKREQSNDIARGF	_SNFSNSADDIK(gl)SK_	1	146.81	1.77e-16	-0.67942	2902000	0
69	CBX5;CBX5;CBX3	Chromobox protein homolog 5;Chromobox protein homolog 3	154	0.524236		LMKWKDTDEADLVLAKEANVKCPQIVIAFYE	_ADLVLAK(gl)E_	1	68.371	0.0166741	0.20793	1451100	334790
70	CCAR1	Cell division cycle and apoptosis regulator protein 1	1012	0.2702		EDMLGNRLLLPTPTVKQESKDVEENVGLIVY	_DMLGNRLLLPTPTVK(gl)QE_	1	81.967	3.77e-12	-0.16376	54722000	7330100
71	CCT4;CCT4;CCT4	T-complex protein 1 subunit delta;T-complex protein 1 subunit delta;T-complex protein 1 subunit delta	209	0.659155		VIDPATATSVDLRDIKIVKKLGGTIDDCELV	_VIDPATATSVDLRDIK(gl)IVK_	1	38.417	0.0190995	0.5669	763400	109420
72	CD3EAP	DNA-directed RNA polymerase I subunit RPA34	316	0.360316		MEPEEGVTVESQPQVKVEPLEEAIPLPPTKK	_SQPQVK(gl)VEPLEE_	1	41.684	0.0386094	0.14945	15491000	2996200
73	CD3EAP	DNA-directed RNA polymerase I subunit RPA34	272			KPKGKETFEPEDKTVKQEQINTEPLEDTVLS	_TVK(gl)QEQINTEPLEDTVLSPTK_	1	93.006	1.4e-10	1.2547	2403800	0
74	CDC73	Parafibromin	198	0.804373		AAIKAKIMAKKRSTIKTDLDDDITALKQRSF	_RSTIK(gl)TDLDDDITALK_	1	84.573	5.74e-06	0.44532	5886200	1857700
75	CDC73	Parafibromin	136	0.598679		STQVKRAADEVLAEAKKPRIEDEECVRLDKE	_RAADEVLAEAK(gl)K_	1	61.186	0.00873937	0.52555	1984900	686470
76	CDK1	Cyclin-dependent kinase 1	238	2.09967		PNNEVWPEVESLQDYKNTFPKWKPGSLASHV	_VESLQDYK(gl)NTFPK_	1	109.84	3.56e-05	-0.031411	7574300	8101000
77	CDK1;CDK1	Cyclin-dependent kinase 1	6	1.32002		__________MEDYTKIEKIGEGTYGVVYKG	_(ac)M(ox)EDYTK(gl)IEK_	1	91.549	0.000177828	-0.40867	11981000	7957500
78	CDK12	Cyclin-dependent kinase 12	452	3.03359		AKDSGLESKKLPRSVKLEKSAPDTELVNVTH	_KLPRSVK(gl)LEK_	0.996371	63.185	0.00504	0.32069	9961500	15055000
79	CDK7;CDK7;CDK7;CDK7;CDK7;CDK7;CDK7;CDK7	Cyclin-dependent kinase 7	6	0.85344		__________MALDVKSRAKRYEKLDFLGEG	_(ac)ALDVK(gl)SRAK_	1	61.235	0.0166607	0.8117	859240	333880
80	CDKN2AIP	CDKN2A-interacting protein	184			SAQQENSSTCIGSAIKSESGNSARSSGISSQ	_NSSTCIGSAIK(gl)SE_	1	39.006	0.0258186	1.2678	0	0
81	CEBPA	CCAAT/enhancer-binding protein alpha	161	0.258216		LYERVGAPALRPLVIKQEPREEDEAKQLALA	_RVGAPALRPLVIK(gl)QEPREEDE_	1	103.85	2.49e-11	0.25136	3405200	362640
82	CFL1;CFL1;CFL1;CFL1;CFL1;CFL1;CFL1	Cofilin-1	83			KKRKKAVLFCLSEDKKNIILEEGKEILVGDV	_K(gl)NIILEEGK_	1	53.124	0.0272401	0.49881	1150900	0
83	CFL1;CFL1;CFL1;CFL1;CFL1;CFL2;DSTN;CFL2;DSTN	Cofilin-1;Cofilin-2;Destrin	159			PESAPLKSKMIYASSKDAIKKKLTGIKHELQ	_M(ox)IYASSK(gl)DAIK_	1	52.527	0.0183756	-0.1134	2176400	0
84	CHD1L	Chromodomain-helicase-DNA-binding protein 1-like	263	0.632521		SELHKLLQPFLLRRVKAEVATELPKKTEVVI	_LLQPFLLRRVK(gl)AE_	1	69.331	0.0111456	0.67601	1016000	179940
85	CHD4;CHD4	Chromodomain-helicase-DNA-binding protein 4	711	0.325409		KLERPPETPTVDPTVKYERQPEYLDATGGTL	_LERPPETPTVDPTVK(gl)YE_	1	49.463	0.0055361	0.2628	15324000	2886000
86	CHD4;CHD4	Chromodomain-helicase-DNA-binding protein 4	1600			VPPAEDGIKIEENSLKEEESIEGEKEVKSTA	_IEENSLK(gl)EEESIEGEK_	1	132.44	6.19e-13	0.53425	4056700	0
87	CHD4;CHD4	Chromodomain-helicase-DNA-binding protein 4	1675			ETEPKGAADVEKVEEKSAIDLTPIVVEDKEE	_K(gl)SAIDLTPIVVEDK_	1	72.958	0.00339121	1.2339	977060	0
88	CHD4;CHD4	Chromodomain-helicase-DNA-binding protein 4	1212			LVVRPGLGSKTGSMSKQELDDILKFGTEELF	_TGSM(ox)SK(gl)QELDDILK_	1	48.351	0.0164221	-2.4763	0	0
89	CKAP2;CKAP2	Cytoskeleton-associated protein 2	198	0.36859		IVQSKINSFRKPLQVKDESSAATKKLSATIP	_PLQVK(gl)DESSAATK_	1	165.58	9.34e-17	-0.19455	13174000	1711800
90	CMPK1;CMPK1	UMP-CMP kinase	73			KEGKIVPVEITISLLKREMDQTMAANAQKNK	_ITISLLK(gl)RE_	1	78.324	8.87e-15	-0.65699	0	0
91	COTL1;COTL1	Coactosin-like protein	126			EFVISDRKELEEDFIKSELKKAGGANYDAQT	_ELEEDFIK(gl)SELK_	1	37.525	0.0346222	-1.7694	2100400	0
92	CPSF6;CPSF6	Cleavage and polyadenylation specificity factor subunit 6	493	37.1789		YGSAIETLVTAISLIKQSKVSADDRCKVLIS	_TLVTAISLIK(gl)QSK_	1	114.01	3.67e-06	-0.051327	156190	3831400
93	CRISPLD2;CRISPLD2;CRISPLD2	Cysteine-rich secretory protein LCCL domain-containing 2	361			GLVDITRNGKVPFFVKSERHGVQSLSKYKPS	_VPFFVK(gl)SE_	1	62.969	0.0387712	0.64336	1192300	0
94	CSRP2BP	Cysteine-rich protein 2-binding protein	411	0.501312		PVVGVRKKVRGPEQIKQEVESEEEKPDRMDI	_VRGPEQIK(gl)QE_	1	76.332	0.00267238	0.5911	32149000	9296000
95	CTCF	Transcriptional repressor CTCF	74	0.59563		QMVMMEQLDPTLLQMKTEVMEGTVAPEAEAA	_QLDPTLLQMK(gl)TE_	1	111.94	4.65e-05	-0.36659	17723000	5137500
96	CTCF	Transcriptional repressor CTCF	168			MICHTLPLPEGFQVVKVGANGEVETLEQGEL	_GFQVVK(gl)VGANGE_	1	77.674	0.0122133	0.083553	848440	0
97	DDB1;DDB1;DDB1;DDB1	DNA damage-binding protein 1	867			QYSDGKLQTVAEKEVKGAVYSMVEFNGKLLA	_EVK(gl)GAVYSM(ox)VEFNGK_	1	87.447	5.61e-05	0.90309	5583100	0
98	DDX10;DDX10	Probable ATP-dependent RNA helicase DDX10	649	0.800492		DFLKVKRHNVFGLDLKDEKTLQKKEPSKSSI	_RHNVFGLDLK(gl)DEK_	1	100.04	0.000136676	0.26607	1798000	673350
99	DDX18;DDX18	ATP-dependent RNA helicase DDX18	380	0.378485		ATQTRKVEDLARISLKKEPLYVGVDDDKANA	_VEDLARISLK(gl)K_	1	87.138	0.000253104	-0.28846	22388000	4846800
100	DDX19A;DDX19A;DDX19A	ATP-dependent RNA helicase DDX19A	26	0.485959		DEQEAAVKSMTNLQIKEEKVKADTNGIIKTS	_SM(ox)TNLQIK(gl)EEK_	1	154.72	4.38e-17	0.74192	20154000	1441600
101	DDX19A;DDX19B;DDX19B;DDX19A	ATP-dependent RNA helicase DDX19A;ATP-dependent RNA helicase DDX19B	297			KFAQKVVPDPNVIKLKREEETLDTIKQYYVL	_LK(gl)REEETLDTIK_	1	171.71	7.73e-25	0.32747	3407600	0
102	DDX21;DDX50	Nucleolar RNA helicase 2;ATP-dependent RNA helicase DDX50	199			KEGAFSNFPISEETIKLLKGRGVTFLFPIQA	_EGAFSNFPISEETIK(gl)LLK_	1	35.133	0.000426172	-1.8211	0	0
103	DDX24;DDX24;DDX24	ATP-dependent RNA helicase DDX24	370	0.212867		ENEEENLDKEQTGNLKQELDDKSATCKAYPK	_EQTGNLK(gl)QELDDK_	1	108.49	2.13e-07	0.33599	10438000	1192700
104	DDX24;DDX24;DDX24	ATP-dependent RNA helicase DDX24	825	0.173838		PTQSGKPPLLVSAPSKSESALSCLSKQKKKK	_YPTQSGKPPLLVSAPSK(gl)SE_	0.998058	45.557	0.0228192	0.064606	2994300	187440
105	DDX24;DDX24;DDX24	ATP-dependent RNA helicase DDX24	815			LFTESQKTKYPTQSGKPPLLVSAPSKSESAL	_YPTQSGK(gl)PPLLVSAPSK_	1	68.567	8e-05	0.26972	0	0
106	DDX39A;DDX39;DDX39	ATP-dependent RNA helicase DDX39A	154	0.643354		MPSVKVSVFFGGLSIKKDEEVLKKNCPHVVV	_VSVFFGGLSIK(gl)K_	1	76.151	0.000436909	0.27495	7550300	856360
107	DDX39A;DDX39;DDX39B;DDX39B;BAT1;DDX39B;DDX39B;DDX39B;DDX39B;DDX39B;DDX39B;DDX39B;DDX39B;DDX39B;DDX39B;DDX39B;DDX39B	ATP-dependent RNA helicase DDX39A;Spliceosome RNA helicase DDX39B	255	0.495299		KFMQDPMEVFVDDETKLTLHGLQQYYVKLKD	_TK(gl)LTLHGLQQYYVK_	1	102.5	4.05e-07	0.15183	4408500	679350
108	DDX3X;DDX3X	ATP-dependent RNA helicase DDX3X	215			YTRPTPVQKHAIPIIKEKRDLMACAQTGSGK	_HAIPIIK(gl)EK_	1	65.404	0.0152279	0.044738	4417400	0
109	DDX46;DDX46	Probable ATP-dependent RNA helicase DDX46	186	0.739164		REEQRKKAMENIGELKKEIEEMKQGKKWSLE	_AM(ox)ENIGELK(gl)K_	1	108.71	3.1e-05	0.91486	4588500	1824200
110	DGCR8	Microprocessor complex subunit DGCR8	500	3.7181		ANQKLITLSVQDAPTKKEFVINPNGKSEVCI	_LITLSVQDAPTK(gl)K_	1	61.167	0.00195	-0.51581	1918800	3005800
111	DHFR;DHFR	Dihydrofolate reductase	179	1.94296		PGVLSDVQEEKGIKYKFEVYEKND_______	_YK(gl)FEVYEK_	1	35.224	0.0292209	0.70981	484140	418470
112	DHX15	Putative pre-mRNA-splicing factor ATP-dependent RNA helicase DHX15	370	0.634994		FLTGQEEIDEACKRIKREVDDLGPEVGDIKI	_RIK(gl)REVDDLGPEVGDIK_	1	127.78	6.01e-13	1.0733	3454500	957680
113	DHX8;DHX8	ATP-dependent RNA helicase DHX8	140			PDNPSVRTMLDEDDVKVAVDVLKELEALMPS	_DDVK(gl)VAVDVLK_	1	45.257	0.0313013	-0.45289	242940	0
114	DHX9	ATP-dependent RNA helicase A	697	0.58936		QILPLHSQIPREEQRKVFDPVPVGVTKVILS	_(gl)QRK(gl)VFDPVPVGVTK_	1	47.545	0.0216125	-0.11626	2399300	290440
115	DHX9	ATP-dependent RNA helicase A	120	0.322295		LPTTMGGPLPPHLALKAENNSEVGASGYGVP	_GDLPTTM(ox)GGPLPPHLALK(gl)AE_	1	31.279	0.00700604	0.1368	4570200	1083800
116	DKC1	H/ACA ribonucleoprotein complex subunit 4	424	6.81716		PATWKQEYVDYSESAKKEVVAEVVKAPQVVA	_(gl)QEYVDYSESAK(gl)K_	1	124.25	3.62e-08	0.0082727	2727100	9535500
117	DKC1;DKC1;DKC1;DKC1	H/ACA ribonucleoprotein complex subunit 4	39	2.83613		EEDVAEIQHAEEFLIKPESKVAKLDTSQWPL	_SLPEEDVAEIQHAEEFLIK(gl)PESK_	1	41.084	0.00193	-0.089844	2140200	4581200
118	DNAJC3	DnaJ homolog subfamily C member 3	296			DGRYTDATSKYESVMKTEPSIAEYTVRSKER	_SVM(ox)K(gl)TEPSIAE_	1	70.942	0.00874792	0.4457	784990	0
119	DNMT3B	DNA (cytosine-5)-methyltransferase 3B	617	7.81876		VASEVCEESIAVGTVKHEGNIKYVNDVRNIT	_SIAVGTVK(gl)HE_	1	51.546	0.00506154	0.64468	1390400	4839600
120	DNTTIP2	Deoxynucleotidyltransferase terminal-interacting protein 2	425	0.499009		EDMNSEGNVDFECDTKLYTSAPNTSQGKDNS	_TK(gl)LYTSAPNTSQGK_	1	87.447	4.06e-06	0.97862	8071000	1890900
121	DNTTIP2	Deoxynucleotidyltransferase terminal-interacting protein 2	321	0.372045		ITDEGKEINEKSSQLKNLSELQDTSLQQLVS	_SSQLK(gl)NLSE_	1	109.79	0.00113634	0.30454	2227800	517860
122	DPF3;DPF3;DPF3;DPF3	Zinc finger protein DPF3	154			RLHPPEDPKLRLLEIKPEVELPLKKDGFTSE	_LRLLEIK(gl)PEVELPLK_	1	88.264	6.04e-05	-0.48306	1291200	0
123	DYNC1I1;DYNC1I1;DYNC1I1;DYNC1I1;DYNC1I1;DYNC1I1	Cytoplasmic dynein 1 intermediate chain 1	4	0.245869		____________MSDKSDLKAELERKKQRLA	_(ac)SDK(gl)SDLK_	1	35.826	0.0251147	0.6065	34403000	5673300
124	DYNLL1;DYNLL1;DYNLL1;DYNLL1	Dynein light chain 1, cytoplasmic	9	0.420046		_______MCDRKAVIKNADMSEEMQQDSVEC	_AVIK(gl)NADM(ox)SEE_	1	52.391	0.00625022	0.15397	4396100	757280
125	DYNLL2	Dynein light chain 2, cytoplasmic	43			AMEKYNIEKDIAAYIKKEFDKKYNPTWHCIV	_DIAAYIK(gl)K_	1	60.434	0.0179094	0.0061392	394160	0
126	EAF1;EAF1	ELL-associated factor 1	174	0.278964		PLKDNPSPEPQLDDIKRELRAEVDIIEQMSS	_DNPS(ph)PEPQLDDIK(gl)RE_	1	118.15	1.29e-13	0.6901	5086900	443480
127	EBNA1BP2;EBNA1BP2	Probable rRNA-processing protein EBP2	273	0.701846		QKGFSDKLDFLEGDQKPLAQRKKAGAKGQQM	_LDFLEGDQK(gl)PLAQRK_	1	63.894	0.00141931	-1.23	1401400	595320
128	ECT2;ECT2;ECT2;ECT2;ECT2;ECT2	Protein ECT2	109			LIKSVINMDIKVGFVKMESVEEFEGLDSPEF	_VGFVK(gl)M(ox)E_	1	73.499	0.0162098	0.57183	889440	0
129	EEF1A1;EEF1A1P5	Elongation factor 1-alpha 1;Putative elongation factor 1-alpha-like 3	330	0.387739		VSVKDVRRGNVAGDSKNDPPMEAAGFTAQVI	_VRRGNVAGDSK(gl)NDPPM(ox)E_	1	33.872	0.0210093	0.18761	3890900	813270
130	EEF1A1;EEF1A1P5	Elongation factor 1-alpha 1;Putative elongation factor 1-alpha-like 3	439	0.345837		FAVRDMRQTVAVGVIKAVDKKAAGAGKVTKS	_M(ox)RQTVAVGVIK(gl)AVDK_	1	105.39	2.36e-07	0.35386	6639200	905000
131	EEF1A1;EEF1A1P5	Elongation factor 1-alpha 1;Putative elongation factor 1-alpha-like 3	395	0.315365		DRRSGKKLEDGPKFLKSGDAAIVDMVPGKPM	_FLK(gl)SGDAAIVDM(ox)VPGK_	1	107.5	1.11e-08	0.281	61846000	9721600
132	EEF1A1;EEF1A1P5	Elongation factor 1-alpha 1;Putative elongation factor 1-alpha-like 3	392	0.304873	0.138237	EKIDRRSGKKLEDGPKFLKSGDAAIVDMVPG	_LEDGPK(gl)FLK_	1	199.41	8.88e-23	0.65908	129390000	19598000
133	EEF1A1;EEF1A1P5	Elongation factor 1-alpha 1;Putative elongation factor 1-alpha-like 3	219	0.302101		PSANMPWFKGWKVTRKDGNASGTTLLEALDC	_VTRK(gl)DGNASGTTLLE_	1	116.96	9.83e-09	0.15632	10751000	1493400
134	EEF1A1;EEF1A1P5	Elongation factor 1-alpha 1;Putative elongation factor 1-alpha-like 3	273	0.274507		GIGTVPVGRVETGVLKPGMVVTFAPVNVTTE	_IGGIGTVPVGRVETGVLK(gl)PGM(ox)VVTFAPVNVTTEVK_	1	66.828	1.56e-07	0.33752	20723000	895150
135	EEF1A1;EEF1A1P5	Elongation factor 1-alpha 1;Putative elongation factor 1-alpha-like 3	386		0.138237	KFAELKEKIDRRSGKKLEDGPKFLKSGDAAI	_K(gl)LEDGPK(gl)FLK_	1	91.592	0.000197425	-1.331	3331300	375190
136	EEF1A1;EEF1A1P5;EEF1A2	Elongation factor 1-alpha 1;Putative elongation factor 1-alpha-like 3;Elongation factor 1-alpha 2	255	0.29129		RPTDKPLRLPLQDVYKIGGIGTVPVGRVETG	_VYK(gl)IGGIGTVPVGRVE_	1	98.281	7.69e-08	-0.5176	56639000	8145900
137	EEF1B2;EEF1B2	Elongation factor 1-beta	78			EKEKASLPGVKKALGKYGPADVEDTTGSGAT	_ALGK(gl)YGPADVEDTTGSGATDSK_	1	68.88	1.36e-06	-0.21995	741480	0
138	EFTUD2	116 kDa U5 small nuclear ribonucleoprotein component	64	1.71061		DDDHPGMEVVLHEDKKYYPTAEEVYGPEVET	_K(gl)YYPTAEE_	1	85.958	0.00983607	-0.002162	3570000	2916400
139	EIF4A1	Eukaryotic initiation factor 4A-I	309	0.630367		ARDFTVSAMHGDMDQKERDVIMREFRSGSSR	_MHARDFTVSAM(ox)HGDM(ox)DQK(gl)E_	1	33.37	0.00910707	1.4669	593120	187800
140	EIF4A1	Eukaryotic initiation factor 4A-I	381	0.282824		FGRKGVAINMVTEEDKRTLRDIETFYNTSIE	_EDK(gl)RTLRDIE_	1	88.163	0.00365604	-0.16435	7110400	1335300
141	EIF4A1	Eukaryotic initiation factor 4A-I	225			VLLSATMPSDVLEVTKKFMRDPIRILVKKEE	_LNSNTQVVLLSATM(ox)PSDVLEVTK(gl)K_	1	103.02	4e-13	-0.26612	2122800	0
142	EIF4A1;EIF4A1	Eukaryotic initiation factor 4A-I	99	0.388976		ATFAISILQQIELDLKATQALVLAPTRELAQ	_LDLK(gl)ATQALVLAPTRE_	1	85.636	0.0015691	0.61865	1464500	259960
143	EIF4A3	Eukaryotic initiation factor 4A-III	15	0.530079		_MATTATMATSGSARKRLLKEEDMTKVEFET	_(ac)ATTATM(ox)ATSGSARK(gl)RLLK_	1	39.237	0.00979752	1.1815	3095000	713130
144	EIF4A3	Eukaryotic initiation factor 4A-III	74	0.202077		EKPSAIQQRAIKQIIKGRDVIAQSQSGTGKT	_(gl)QIIK(gl)GRDVIAQSQSGTGK_	1	133.16	1.04e-14	0.61682	9531500	612260
145	EIF4A3	Eukaryotic initiation factor 4A-III	70	0.178909		AYGFEKPSAIQQRAIKQIIKGRDVIAQSQSG	_PSAIQQRAIK(gl)QIIK_	1	146.2	1.04e-16	0.7914	5394200	378090
146	EIF5	Eukaryotic translation initiation factor 5	374			SKKYVSKELAKEIRVKAEPFIKWLKEAEEES	_EIRVK(gl)AEPFIK_	1	63.473	0.0123127	0.17863	1277600	0
147	EIF5A;EIF5AL1;EIF5A2;EIF5A2;EIF5A2;EIF5A2	Eukaryotic translation initiation factor 5A-1;Eukaryotic translation initiation factor 5A-1-like;Eukaryotic translation initiation factor 5A-2	85	0.394606		EDICPSTHNMDVPNIKRNDFQLIGIQDGYLS	_DICPSTHNM(ox)DVPNIK(gl)RND_	1	32.391	0.0214173	0.29573	1622600	260730
148	ELAVL1	ELAV-like protein 1	347	4.31625		LNGYRLGDKILQVSFKTNKSHK_________	_ILQVSFK(gl)TNK_	1	76.262	0.00149018	0.91436	500370	970080
149	ENO1	Alpha-enolase	221			NVGDEGGFAPNILENKEGLELLKTAIGKAGY	_DATNVGDEGGFAPNILENK(gl)EGLELLK_	1	84.68	4.9e-09	-0.057394	4084300	0
150	ENO1;ENO2;ENO3;ENO2;ENO3	Alpha-enolase;Gamma-enolase;Beta-enolase;Enolase;Enolase	202			EVYHNLKNVIKEKYGKDATNVGDEGGFAPNI	_YGK(gl)DATNVGDEGGFAPNILENK_	1	116.55	9.98e-11	1.7042	2061800	0
151	ENO3;ENO3;ENO2;ENO2	Beta-enolase;Enolase;Gamma-enolase;Enolase	202		1.50558	EVYHHLKGVIKAKYGKDATNVGDEGGFAPNI	_YGK(gl)DATNVGDE_	1	116.55	2.3e-08	0.63724	15004000	9345000
152	EPC1	Enhancer of polycomb homolog 1	319			ITNSSQFKHQEAMDVKEFKVNKQDKADLIRP	_HQEAM(ox)DVK(gl)EFK_	1	59.116	0.0127458	0.4723	500140	0
153	EPC2;EPC2;EPC2	Enhancer of polycomb homolog 2	135			EDETLLNRLNRKMEIKPLQFEIMIDRLEKAS	_IK(gl)PLQFE_	1	75.189	0.0276598	0.11389	641810	0
154	ERC1;ERC1	ELKS/Rab6-interacting/CAST family member 1	444			YRSHSKFMKNKVEQLKEELSSKEAQWEELKK	_VEQLK(gl)EELSSK_	1	54.598	0.0197642	-0.66245	8599900	0
155	ESF1	ESF1 homolog	138			KGSENKTDLDNSIGIKKMKTSCKFKIDSNIS	_TDLDNSIGIK(gl)K_	1	83.692	0.00227546	0.48286	2840200	0
156	ESRRA;ESRRA	Steroid hormone receptor ERR1	403	0.718543		LRQTAGKVLAHFYGVKLEGKVPMHKLFLEML	_VLAHFYGVK(gl)LEGK_	1	49.5	0.00252157	-1.3468	8216700	3032200
157	ETFB	Electron transfer flavoprotein subunit beta	329			SVISVEDPPQRTAGVKVETTEDLVAKLKEIG	_LSVISVEDPPQRTAGVK(gl)VE_	1	38.017	0.0193477	0.91296	1409700	0
158	ETS1;ETS1	Protein C-ets-1	2	107.715		______________MKAAVDLKPTLTIIKTE	_K(gl)AAVDLK_	1	35.356	0.0322979	-0.39963	1999000	112720000
159	ETV6	Transcription factor ETV6	11			_____MSETPAQCSIKQERISYTPPESPVPS	_(ac)SETPAQCSIK(gl)QE_	1	97.957	7.86e-05	-0.22168	4686300	0
160	EXOSC10;EXOSC10	Exosome component 10	218			FIKPNAQKPLPQALSKERRERPQDRPEDLDV	_PLPQALSK(gl)E_	1	52.79	0.034974	0.65504	405840	0
161	EXOSC9;EXOSC9	Exosome complex component RRP45	297	0.62333		FGFAESIANQRITAFKMEKAPIDTSDVEEKA	_SIANQRITAFK(gl)M(ox)EK_	1	55.186	7.15e-12	0.38084	21091000	5578100
162	EYA4;EYA4;EYA4;EYA4	Eyes absent homolog 4	203	0.720014		YSLPTYDLGVMLPAIKTESGLSQTQSPLQSG	_LGVM(ox)LPAIK(gl)TE_	1	41.164	0.0107539	-0.55097	3190500	1266900
163	FAM50A	Protein FAM50A	42			QMEQMKQRIAEENIMKSNIDKKFSAHYDAVE	_(gl)QRIAEENIM(ox)K(gl)SNIDK_	1	69.331	0.000173953	-0.42628	618280	0
164	FAM50A;FAM50A	Protein FAM50A	48			QRIAEENIMKSNIDKKFSAHYDAVEAELKSS	_K(gl)FSAHYDAVEAELK_	1	58.073	0.00486238	-0.27798	1002400	0
165	FAM50A;FAM50A	Protein FAM50A	61			DKKFSAHYDAVEAELKSSTVGLVTLNDMKAK	_LK(gl)SSTVGLVTLNDM(ox)K_	1	52.522	0.00595403	0.19095	732530	0
166	FAM50A;FAM50A	Protein FAM50A	74			ELKSSTVGLVTLNDMKAKQEALVKEREKQLA	_SSTVGLVTLNDM(ox)K(gl)AK_	1	40.237	0.0234717	1.1428	1151900	0
167	FAM50B	Protein FAM50B	61			DKRFSAHYDAVEAELKSSTVGLVTLNDMKAR	_LK(gl)SSTVGLVTLNDM(ox)K_	1	52.522	0.00595403	0.19095	732530	0
168	FAM90A27P	Putative protein FAM90A-like	85	0.623927		QALGSHKEKENLKPAKAQLPFTTPGPFTTND	_PAK(gl)AQLPFTTPGPFTTNDREK_	1	56.055	0.000123639	-0.20715	2496700	380360
169	FCHO2;FCHO2	FCH domain only protein 2	297			IKPRKRKTFALPGIIKKEKDAESVECPDADS	_TFALPGIIK(gl)K_	1	83.617	0.00276287	-0.0256	842730	0
170	FEN1	Flap endonuclease 1	171			PSEAEASCAALVKAGKVYAAATEDMDCLTFG	_AGK(gl)VYAAATE_	1	63.283	0.0210744	0.47581	975220	0
171	FEN1;FEN1	Flap endonuclease 1	99	0.323447		VFDGKPPQLKSGELAKRSERRAEAEKQLQQA	_SGELAK(gl)RSERRAEAEK_	1	117.31	4.15e-09	0.50147	11558000	2351400
172	FEN1;FEN1	Flap endonuclease 1	109			SGELAKRSERRAEAEKQLQQAQAAGAEQEVE	_K(gl)QLQQAQAAGAEQE_	1	70.622	0.0171202	0.45602	824160	0
173	FIGNL1	Fidgetin-like protein 1	225			SATAKFHVTPLFGNVKKENHSSAKENIGLNV	_FHVTPLFGNVK(gl)K_	1	77.062	0.0140031	2.5919	0	0
174	FIP1L1	Pre-mRNA 3'-end-processing factor FIP1	254	3.32829		GRTGNSEKETALPSTKAEFTSPPSLFKTGLP	_ETALPSTK(gl)AEFTSPPSLFK_	1	85.146	3.36e-07	0.2843	3089300	2520900
175	FLNA;FLNA;FLNA	Filamin-A	299	0.423479		ARAYGPGIEPTGNMVKKRAEFTVETRSAGQG	_ARAYGPGIEPTGNMVK(gl)K_	1	74.141	3.07e-05	-0.00050709	25152000	4649600
176	FOS;FOS;FOS;FOS;FOS	Proto-oncogene c-Fos	265	0.21053		KPSVEPVKSISSMELKTEPFDDFLFPASSRP	_LK(gl)TEPFDDFLFPASSRPSGSE_	1	91.276	4.7e-08	0.21916	6875800	806070
177	FOXP4;FOXP4	Forkhead box protein P4	246			WKGEGAPGQPAEDSVKQEGLDLTGTAATATS	_GEGAPGQPAEDSVK(gl)QE_	1	54.281	0.000293882	-0.61515	818280	0
178	FSBP	Fibrinogen silencer-binding protein	94	1.30526		AKQELLQQKETQSDFKSNISEPTKKVMEMIP	_TQSDFK(gl)SNISEPTK_	1	79.022	7.42e-05	-0.14854	15227000	2468500
179	FTSJ3	Putative rRNA methyltransferase 3	579			QQQKQQLPQTPPSCLKTEIMSPLYQDEAPKG	_(gl)QQLPQTPPSCLK(gl)TE_	1	40.941	0.0181671	0.46746	1188800	0
180	FUBP3	Far upstream element-binding protein 3	15	0.804608		_MAELVQGQSAPVGMKAEGFVDALHRVRQIA	_LVQGQSAPVGM(ox)K(gl)AE_	1	39.427	0.0125697	-0.4285	2820500	1185000
181	FXR1;FXR1;FXR1	Fragile X mental retardation syndrome-related protein 1	56	0.201732		QVPFNEVRLPPPPDIKKEISEGDEVEVYSRA	_VRLPPPPDIK(gl)K_	1	73.156	0.000431162	0.61498	5990100	688540
182	G3BP1;G3BP1	Ras GTPase-activating protein-binding protein 1	214			EPEPEQEPVSEIQEEKPEPVLEETAPEDAQK	_EK(gl)PEPVLE_	1	37.476	0.0120908	0.57434	0	0
183	G6PC		117	0.534088		IKQFPVTCETGPGKDKADLQISVLECHFVVG	_K(gl)ADLQISVLE_	1	42.001	0.0222804	0.76803	2370300	457860
184	GANAB;GANAB;GANAB	Neutral alpha-glucosidase AB	930			VIIGAGKPAAVVLQTKGSPESRLSFQHDPET	_PAAVVLQTK(gl)GSPE_	1	42.843	0.0293941	-0.66989	295110	0
185	GART	Trifunctional purine biosynthetic protein adenosine-3;Phosphoribosylamine--glycine ligase;Phosphoribosylformylglycinamidine cyclo-ligase;Phosphoribosylglycinamide formyltransferase	411	0.433864		LISALEEAKKGLAAIKFEGAIYRKDVGFRAI	_GLAAIK(gl)FE_	1	43.808	0.0283834	1.1116	592510	151300
186	GART;GART;GART;GART;GART	Trifunctional purine biosynthetic protein adenosine-3;Phosphoribosylamine--glycine ligase;Phosphoribosylformylglycinamidine cyclo-ligase;Phosphoribosylglycinamide formyltransferase	219	0.416229		TDGKTVAPMPPAQDHKRLLEGDGGPNTGGMG	_TVAPM(ox)PPAQDHK(gl)RLLE_	1	76.151	0.00193257	0.01876	1249900	201600
187	GATAD2A;GATAD2A;GATAD2A;GATAD2A;GATAD2A	Transcriptional repressor p66-alpha	488			IEQRLLQQGTAPAQAKAEPTAAPHPVLKQVI	_(gl)QRLLQQGTAPAQAK(gl)AEPTAAPHPVLK_	1	68.231	1.95e-06	0.65614	1081900	0
188	GLO1	Lactoylglutathione lyase	148			PDVYSACKRFEELGVKFVKKPDDGKMKGLAF	_RFEELGVK(gl)FVK_	1	48.044	0.0266649	-1.6977	518180	0
189	GLRX3	Glutaredoxin-3	67	0.375521		VMAELAKELPQVSFVKLEAEGVPEVSEKYEI	_ELPQVSFVK(gl)LEAEGVPEVSEK_	1	78.987	3.03e-07	0.45912	16050000	1452700
190	GLT6D1	Glycosyltransferase 6 domain-containing protein 1	264			GVIHDIKNGLNSTYEKHLNKYFYLNKPTKLL	_N(de)GLN(de)STYEK(gl)HLNK_	1	37.613	0.0265817	-1.465	5374000	0
191	GLYR1	Putative oxidoreductase GLYR1	269	1.37527		ADSTAVNGSITPTDKKIGFLGLGLMGSGIVS	_K(gl)IGFLGLGLM(ox)GSGIVSNLLK_	1	116.98	1.18e-09	-0.018166	46216000	29931000
192	GMEB1		30	0.485341		VVPTEGNEGENPEDTKTQVILQLQPVQQGIY	_DTK(gl)TQVILQLQPVQQGIYE_	1	31.111	0.0112439	-0.051636	3416700	777020
193	GNB2L1;GNB2L1;GNB2L1;GNB2L1;GNB2L1;GNB2L1;GNB2L1;GNB2L1	Guanine nucleotide-binding protein subunit beta-2-like 1	289	0.626955		IKIWDLEGKIIVDELKQEVISTSSKAEPPQC	_IIVDELK(gl)QEVISTSSK_	1	115.8	9.67e-10	1.4852	55786000	16718000
194	GNL2	Nucleolar GTP-binding protein 2	635			SAVRISKGLSEKIFAKPEEQRKTLEEDVDDR	_IFAK(gl)PEEQRK_	1	64.906	0.0141193	0.40207	1694100	0
195	GNL3;GNL3;GNL3	Guanine nucleotide-binding protein-like 3	114			KPSNVEPMEKEFGLCKTENKAKSGKQNSKKL	_FGLCK(gl)TE_	1	64.757	0.0398557	0.24754	560540	0
196	GNL3;GNL3;GNL3;GNL3	Guanine nucleotide-binding protein-like 3	99	0.237638		KELEKKRKLETNPDIKPSNVEPMEKEFGLCK	_LETNPDIK(gl)PSNVEPMEK_	1	104.84	8.39e-07	-0.35966	70289000	6950900
197	GNL3L	Guanine nucleotide-binding protein-like 3-like protein	477			LLHSPMTKIADAIENKTTVYKIGDLTGYCTN	_IADAIENK(gl)TTVYK_	1	48.112	0.0167848	0.1692	0	0
198	GOLGA4;GOLGA4;GOLGA4	Golgin subfamily A member 4	882	1.04406		VEAQKKDVCTELDAHKIQVQDLMQQLEKQNS	_AHK(gl)IQ(de)VQD_	1	33.961	0.0381	-0.33061	1679900	905500
199	GOPC		149	0.776566		HAKTGQSADSGTIKAKLERELEANKKEKMKE	_AK(gl)LERELEANKK_	0.999956	46.643	0.0276086	0.84545	2821900	1008700
200	GOPC;GOPC	Golgi-associated PDZ and coiled-coil motif-containing protein	102	1.06628		VSQINHKLEAQLVDLKSELTETQAEKVVLEK	_AQLVDLK(gl)SE_	1	78.939	0.00528059	-0.85126	1549400	877720
201	GTF2E1;GTF2E1	General transcription factor IIE subunit 1	215			AYEILEPEPTEIPALKQSKDHAATTAGAASL	_ILEPEPTEIPALK(gl)QSK_	1	52.823	0.00140617	0.22955	457130	0
202	GTF2F2	General transcription factor IIF subunit 2	226			VYLKEILKEIGVQNVKGIHKNTWELKPEYRH	_EIGVQNVK(gl)GIHK_	1	55.452	0.018113	2.1543	0	0
203	GTF2I	General transcription factor II-I	372	1.15637		RITDLRKQVEELFERKYAQAIKAKGPVTIPY	_(gl)QVEELFERK(gl)YAQAIK_	1	62.861	0.000173	-0.045183	3059200	1610000
204	GTF2I	General transcription factor II-I	488	0.890651		LFCKKFAEALGSTEAKAVPYQKFEAHPNDLY	_FAEALGSTEAK(gl)AVPYQK_	1	105.31	1.14e-07	-0.76931	7318100	1228100
205	GTF2I	General transcription factor II-I	494	0.574028		AEALGSTEAKAVPYQKFEAHPNDLYVEGLPE	_AVPYQK(gl)FE_	1	48.794	0.0180161	1.284	1305900	460860
206	GTF2I	General transcription factor II-I	561	0.432201		HSTTEVTQPRTNTPVKEDWNVRITKLRKQVE	_VTQPRTNTPVK(gl)E_	1	52.071	0.0188437	-0.22543	1276300	272980
207	GTF2I;GTF2I	General transcription factor II-I	240	0.978912		TEDSGISLEMAAVTVKEESEDPDYYQYNIQA	_MAAVTVK(gl)EE_	1	126.55	0.00048214	-0.33509	131490000	64933000
208	GTF2I;GTF2I	General transcription factor II-I	221	0.620771		RSILSPGGSCGPIKVKTEPTEDSGISLEMAA	_VK(gl)TEPTEDSGISLEM(ox)AAVTVK_	1	142.23	1.94e-15	-0.15148	59066000	20933000
209	GTF2IRD1;GTF2IRD1	General transcription factor II-I repeat domain-containing protein 1	670	0.88967		LRKILEASNSIQFVIKRPELLTEGVKEPIMD	_ASNSIQFVIK(gl)RPE_	1	43.813	0.00946039	0.040647	1433200	747220
210	GTF2IRD1;GTF2IRD1	General transcription factor II-I repeat domain-containing protein 1	527	0.784243		CGPGTSGELGGLRPIKIEPEDLDIIQVTVPD	_LGGLRPIK(gl)IEPE_	1	46.955	0.00693268	-0.021733	7945200	3871000
211	GTPBP4;GTPBP4;GTPBP4	Nucleolar GTP-binding protein 1	617	0.330548		RLGKKGEADRHVFDMKPKHLLSGKRKAGKKD	_KGEADRHVFDM(ox)K(gl)PK_	1	94.973	5.87e-05	0.023339	11280000	1537100
212	H2AFY	Core histone macro-H2A.1	189	1.05291		TTEGTPADGFTVLSTKSLFLGQKLNLIHSEI	_GTPADGFTVLSTK(gl)SLFLGQK_	1	92.819	1.2e-15	0.47942	6340900	1371600
213	H2AFZ;H2AFV	Histone H2A.Z;Histone H2A.V	116			IKATIAGGGVIPHIHKSLIGKKGQQKTV___	_ATIAGGGVIPHIHK(gl)SLIGK_	1	43.534	0.00341562	-0.54127	1755500	0
214	HCA90;TPX2	Targeting protein for Xklp2	677	0.218339		KARPNTVISQEPFVPKKEKKSVAEGLSGSLV	_ARPNTVISQEPFVPK(gl)K_	1	70.451	0.000304493	0.50339	2807500	436910
215	HINT1;HINT1;HINT1;HINT1;HINT1	Histidine triad nucleotide-binding protein 1	7			_________MADEIAKAQVARPGGDTIFGKI	_(ac)ADEIAK(gl)AQVARPGGDTIFGK_	1	49.973	0.00132292	0.21717	684750	0
216	HIST1H1D;HIST1H1E;HIST1H1C	Histone H1.3;Histone H1.4;Histone H1.2	47			GKRKASGPPVSELITKAVAASKERSGVSLAA	_ASGPPVSELITK(gl)AVAASK_	1	42.711	3.31e-12	-0.9275	0	0
217	HIST1H2AG;HIST1H2AD;HIST2H2AA3;HIST2H2AC;H2AFJ;HIST1H2AH;HIST1H2AJ;H2AFJ	Histone H2A type 1;Histone H2A type 1-D;Histone H2A type 2-A;Histone H2A type 2-C;Histone H2A.J;Histone H2A type 1-H;Histone H2A type 1-J;Histone H2A	119	0.940785		AQGGVLPNIQAVLLPKKTESHHKAKGK____	_VTIAQGGVLPNIQAVLLPK(gl)K_	1	108.49	2.41e-10	-0.34057	19154000	9377900
218	HIST1H2BB;HIST2H2BF;HIST1H2BK;HIST1H2BJ;HIST1H2BO;H2BFS;HIST1H2BD;HIST1H2BC;HIST2H2BE;HIST2H2BF;HIST1H2BH;HIST1H2BN;HIST1H2BM;HIST1H2BL	Histone H2B type 1-B;Histone H2B;Histone H2B type 1-K;Histone H2B type 1-J;Histone H2B type 1-O;Histone H2B type F-S;Histone H2B type 1-D;Histone H2B type 1-C/E/F/G/I;Histone H2B type 2-E;Histone H2B type 2-F;Histone H2B type 1-H;Histone H2B type 1-N;Histone H2B type 1-M;Histone H2B type 1-L	109	1.53368		EIQTAVRLLLPGELAKHAVSEGTKAVTKYTS	_RSTITSREIQTAVRLLLPGELAK(gl)HAVSEGTK_	1	79.458	3.75e-34	-0.45767	10915000	10253000
219	HIST3H3	Histone H3.1t	24	1.52987		RKSTGGKAPRKQLATKVARKSAPATGGVKKP	_(gl)QLATK(gl)VARKSAPATGGVK_	0.967021	52.909	0.00356	0.11322	500340	442590
220	HMGB1;HMGB1P1;HMGB1;HMGB1	High mobility group protein B1;Putative high mobility group protein B1-like 1	114			PSAFFLFCSEYRPKIKGEHPGLSIGDVAKKL	_IK(gl)GEHPGLSIGDVAK_	1	78.69	0.00143734	-0.17559	8679000	0
221	HMGN5;NSBP1;NSBP1;NSBP1	High mobility group nucleosome-binding domain-containing protein 5	101			KITEAPASEKEIVEVKEENIEDATEKGGEKK	_EIVEVK(gl)EENIEDATEK_	1	74.786	1.21e-05	0.020333	678950	0
222	HNRNPA0	Heterogeneous nuclear ribonucleoprotein A0	159	0.685576		VYFQNHDAADKAAVVKFHPIQGHRVEVKKAV	_AAVVK(gl)FHPIQGHRVEVK_	1	90.367	5.13e-06	0.18331	5276900	203510
223	HNRNPA0	Heterogeneous nuclear ribonucleoprotein A0	106	0.465808		PGAHAKVKKLFVGGLKGDVAEGDLIEHFSQF	_LFVGGLK(gl)GDVAEGDLIEHFSQFGTVEK_	1	114.21	4.17e-19	-0.026057	33785000	6463600
224	HNRNPA0	Heterogeneous nuclear ribonucleoprotein A0	99	0.444697		SREDSARPGAHAKVKKLFVGGLKGDVAEGDL	_K(gl)LFVGGLK_	1	150.1	4.46e-09	-0.6529	16509000	2510100
225	HNRNPA0	Heterogeneous nuclear ribonucleoprotein A0	171	0.400342		AVVKFHPIQGHRVEVKKAVPKEDIYSGGGGG	_FHPIQGHRVEVK(gl)K_	1	137.81	2.98e-11	-0.039694	12752000	2159900
226	HNRNPA0	Heterogeneous nuclear ribonucleoprotein A0	138	0.398828		TVEKAEIIADKQSGKKRGFGFVYFQNHDAAD	_K(gl)RGFGFVYFQNHDAADK_	1	79.029	4.33e-05	0.59236	4991900	851810
227	HNRNPA1;HNRNPA1;HNRNPA1;HNRNPA1;HNRNPA1;HNRNPA1;HNRNPA1;HNRNPA1	Heterogeneous nuclear ribonucleoprotein A1	3	0.788572		_____________MSKSESPKEPEQLRKLFI	_(ac)SK(gl)SESPKEPEQLRK_	0.999922	106.13	6.06e-08	0.11047	5490700	2170100
228	HNRNPA1;HNRNPA1;HNRNPA1;HNRNPA1;HNRNPA1;HNRNPA1;HNRNPA1;HNRNPA1L2;HNRNPA1;HNRNPA1	Heterogeneous nuclear ribonucleoprotein A1;Heterogeneous nuclear ribonucleoprotein A1-like 2	105	0.848856		VSREDSQRPGAHLTVKKIFVGGIKEDTEEHH	_RAVSREDSQRPGAHLTVK(gl)K_	1	83.758	3.62e-07	0.28367	1759700	696960
229	HNRNPA1;HNRNPA1;HNRNPA1;HNRNPA1;HNRNPA1;HNRNPA1;HNRNPA1;HNRNPA1L2;HNRNPA1;HNRNPA1;HNRNPA3;HNRNPA3	Heterogeneous nuclear ribonucleoprotein A1;Heterogeneous nuclear ribonucleoprotein A1-like 2;Heterogeneous nuclear ribonucleoprotein A3	108	0.575969		MCARPHKVDGRVVEPKRAVSREDSVKPGAHL;MNARPHKVDGRVVEPKRAVSREDSQRPGAHL	_VDGRVVEPK(gl)RAVSRE_	1	60.034	0.00182894	-1.3883	2898500	761500
230	HNRNPA2B1	Heterogeneous nuclear ribonucleoproteins A2/B1	108	1.57011		PGAHVTVKKLFVGGIKEDTEEHHLRDYFEEY	_LFVGGIK(gl)E_	1	97.779	0.00528928	0.22131	18858000	21080000
231	HNRNPA2B1	Heterogeneous nuclear ribonucleoproteins A2/B1	139	0.722445		GKIDTIEIITDRQSGKKRGFGFVTFDDHDPV	_IDTIEIITDRQSGK(gl)K_	1	87.824	5.58e-05	0.50252	4948900	1462600
232	HNRNPA2B1		5	0.544707		___________MEREKEQFRKLFIGGLSFET	_(ac)M(ox)EREK(gl)EQFRK_	1	72.29	0.00160338	-0.3622	27449000	8947600
233	HNRNPA2B1	Heterogeneous nuclear ribonucleoproteins A2/B1	92	0.343726		RVVEPKRAVAREESGKPGAHVTVKKLFVGGI	_RAVAREESGK(gl)PGAHVTVK_	1	36.127	0.010442	0.14664	11022000	2744800
234	HNRNPA3	Heterogeneous nuclear ribonucleoprotein A3	4	0.28003		____________MEVKPPPGRPQPDSGRRRR	_VK(gl)PPPGRPQPD_	1	60.641	0.0175246	0.44703	1965200	361440
235	HNRNPA3;HNRNPA3	Heterogeneous nuclear ribonucleoprotein A3	134	0.843716		PGAHLTVKKIFVGGIKEDTEEYNLRDYFEKY	_IFVGGIK(gl)EDTEEYNLRDYFEK_	1	117.48	3.35e-13	-0.51444	3365900	1128500
236	HNRNPA3;HNRNPA3	Heterogeneous nuclear ribonucleoprotein A3	151	0.601835		DTEEYNLRDYFEKYGKIETIEVMEDRQSGKK	_YGK(gl)IETIEVM(ox)EDRQSGK_	1	111.33	7.47e-09	-0.52432	10128000	3525200
237	HNRNPA3;HNRNPA3	Heterogeneous nuclear ribonucleoprotein A3	118	0.472141		RVVEPKRAVSREDSVKPGAHLTVKKIFVGGI	_RAVSREDSVK(gl)PGAHLTVK_	1	101.92	1.06e-07	0.53563	16641000	2344300
238	HNRNPC;HNRNPC;HNRNPC;HNRNPC;HNRNPC;HNRNPC;HNRNPC	Heterogeneous nuclear ribonucleoproteins C1/C2	250	0.417444		EEQSSSSVKKDETNVKMESEGGADDSAEEGD	_DETNVK(gl)M(ox)ES(ph)EGGADDSAEEGDLLDDDDNEDRGDDQLELIK_	1	129.63	5.06e-26	1.2621	22811000	2108800
239	HNRNPC;HNRNPC;HNRNPC;HNRNPC;HNRNPC;HNRNPC;HNRNPC;HNRNPC;HNRNPC;HNRNPC;HNRNPC;HNRNPC;HNRNPC	Heterogeneous nuclear ribonucleoproteins C1/C2	89	0.338864		MIAGQVLDINLAAEPKVNRGKAGVKRSAAEM	_INLAAEPK(gl)VNRGK_	1	133.71	1.25e-12	0.16158	35217000	7021400
240	HNRNPC;HNRNPC;HNRNPC;HNRNPC;HNRNPC;HNRNPC;HNRNPC;HNRNPC;HNRNPC;HNRNPC;HNRNPC;HNRNPC;HNRNPC;HNRNPC	Heterogeneous nuclear ribonucleoproteins C1/C2	8	0.392367		________MASNVTNKTDPRSMNSRVFIGNL	_(ac)ASNVTNK(gl)TDPRSM(ox)NSRVFIGNLNTLVVK_	1	41.562	0.000761096	-0.27967	20162000	2520100
241	HNRNPC;HNRNPC;HNRNPC;HNRNPC;HNRNPC;HNRNPC;HNRNPC;HNRNPC;HNRNPCL1	Heterogeneous nuclear ribonucleoproteins C1/C2;Heterogeneous nuclear ribonucleoprotein C-like 1	189	0.32801		NSKSGQRGSSKSGKLKGDDLQAIKKELTQIK	_LK(gl)GDDLQAIK_	1	117.14	2.46e-06	0.53883	5070200	855560
242	HNRNPF	Heterogeneous nuclear ribonucleoprotein F;Heterogeneous nuclear ribonucleoprotein F, N-terminally processed	68			QSGEAFVELGSEDDVKMALKKDRESMGHRYI	_LGSEDDVK(gl)MALK_	1	65.472	1.61e-06	0.084184	0	0
243	HNRNPH3	Heterogeneous nuclear ribonucleoprotein H3	67	0.966459		YQGRSTGEAFVQFASKEIAENALGKHKERIG	_AFVQFASK(gl)E_	1	75.819	0.0031633	-0.014677	1675000	621640
244	HNRNPH3	Heterogeneous nuclear ribonucleoprotein H3	76			FVQFASKEIAENALGKHKERIGHRYIEIFRS	_EIAENALGK(gl)HK_	1	89.548	0.001196	0.62288	1033800	0
245	HNRNPK;HNRNPK	Heterogeneous nuclear ribonucleoprotein K	405	0.48018		TQVTIPKDLAGSIIGKGGQRIKQIRHESGAS	_DLAGSIIGK(gl)GGQRIK_	1	92.063	3.68e-06	0.096113	17136000	5135900
246	HNRNPK;HNRNPK	Heterogeneous nuclear ribonucleoprotein K	422	0.414821		GQRIKQIRHESGASIKIDEPLEGSEDRIITI	_SGASIK(gl)IDEPLEGSE_	1	143.46	8.43e-17	-0.050135	48112000	8431400
247	HNRNPK;HNRNPK;HNRNPK	Heterogeneous nuclear ribonucleoprotein K	66	0.749932		SKNAGAVIGKGGKNIKALRTDYNASVSVPDS	_NIK(gl)ALRTDYNASVSVPDSSGPE_	1	41.257	0.00652052	0.72318	1500500	306640
248	HNRNPK;HNRNPK;HNRNPK	Heterogeneous nuclear ribonucleoprotein K	21	0.619492		PEETFPNTETNGEFGKRPAEDMEEEQAFKRS	_FGK(gl)RPAEDM(ox)EEE_	1	48.044	0.00338169	0.16165	2185000	627580
249	HNRNPL	Heterogeneous nuclear ribonucleoprotein L	62	0.550188		YYGGGSEGGRAPKRLKTDNAGDQHGGGGGGG	_RLK(gl)TDNAGDQHGGGGGGGGGAGAAGGGGGGENYDDPHK_	1	199.46	1.87e-105	0.22609	16249000	3662900
250	HNRNPL	Heterogeneous nuclear ribonucleoprotein L	136			ALQEFGPISYVVVMPKKRQALVEFEDVLGAC	_FGPISYVVVM(ox)PK(gl)K_	1	40.857	0.0179888	-0.022927	1253200	0
251	HNRNPM	Heterogeneous nuclear ribonucleoprotein M	242	0.767397		AGVVVRADILEDKDGKSRGIGTVTFEQSIEA	_DGK(gl)SRGIGTVTFE_	1	77.912	7.32e-05	0.15797	2580000	691760
252	HNRNPM	Heterogeneous nuclear ribonucleoprotein M	381	0.643183		GMNMGRINEILSNALKRGEIIAKQGGGGGGG	_ILSNALK(gl)RGE_	1	139.48	4.25e-05	-0.11508	10957000	3876700
253	HNRNPM	Heterogeneous nuclear ribonucleoprotein M	698	0.604714		DIKMENGKSKGCGVVKFESPEVAERACRMMN	_GCGVVK(gl)FESPE_	1	91.937	0.000472006	-0.11421	66497000	19072000
254	HNRNPM	Heterogeneous nuclear ribonucleoprotein M	388	0.597336		NEILSNALKRGEIIAKQGGGGGGGSVPGIER	_IIAK(gl)QGGGGGGGSVPGIE_	1	66.335	6.43e-05	0.0029297	9412600	2372100
255	HNRNPM	Heterogeneous nuclear ribonucleoprotein M	134	0.552469		FKMEESMKKAAEVLNKHSLSGRPLKVKEDPD	_AAEVLNK(gl)HSLSGRPLK_	1	150.45	8.27e-19	-0.12735	17638000	3707600
256	HNRNPM	Heterogeneous nuclear ribonucleoprotein M	345	0.462076		GPAGMGMEGIGFGINKMGGMEGPFGGGMENM	_GIGFGINK(gl)M(ox)GGM(ox)EGPFGGGM(ox)E_	1	35.133	0.00714396	0.010658	1762700	310920
257	HNRNPM	Heterogeneous nuclear ribonucleoprotein M	143		0.337755	AAEVLNKHSLSGRPLKVKEDPDGEHARRAMQ	_HSLSGRPLK(gl)VK(gl)EDPDGE_	1	73.036	1.68e-06	0.13533	6593600	1057500
258	HNRNPM	Heterogeneous nuclear ribonucleoprotein M	145		0.337755	EVLNKHSLSGRPLKVKEDPDGEHARRAMQKV	_HSLSGRPLK(gl)VK(gl)EDPDGE_	1	73.036	1.68e-06	0.13533	6593600	1057500
259	HNRNPM	Heterogeneous nuclear ribonucleoprotein M	17	0.325856		AAGVEAAAEVAATEIKMEEESGAPGVPSGNG	_(ac)AAGVEAAAEVAATEIK(gl)M(ox)EEESGAPGVPSGNGAPGPK_	1	92.343	9.78e-19	-0.19729	10910000	1526000
260	HNRNPM	Heterogeneous nuclear ribonucleoprotein M	55	0.303018		GERPAQNEKRKEKNIKRGGNRFEPYANPTKR	_NIK(gl)RGGNRFEPYANPTK_	1	149.18	7.86e-15	0.59661	17494000	3266300
261	HNRNPM	Heterogeneous nuclear ribonucleoprotein M	37			SGAPGVPSGNGAPGPKGEGERPAQNEKRKEK	_SGAPGVPSGNGAPGPK(gl)GE_	1	54.764	0.000397793	0.85037	1307200	0
262	HNRNPR;HNRNPR	Heterogeneous nuclear ribonucleoprotein R	13	0.654634		___MANQVNGNAVQLKEEEEPMDTSSVTHTE	_(ac)ANQVNGNAVQLK(gl)EE_	1	75.669	8.82e-06	0.8328	5859300	1855100
263	HNRNPR;HNRNPR	Heterogeneous nuclear ribonucleoprotein R	171	0.487025		YSGVQPGIGTEVFVGKIPRDLYEDELVPLFE	_VFVGK(gl)IPRDLYEDE_	1	55.196	0.018012	0.60798	3447900	982000
264	HNRNPU	Heterogeneous nuclear ribonucleoprotein U	670	0.563515		VELQKEEAQKLLEQYKEESKKALPPEKKQNT	_LLEQYK(gl)EESK_	1	138.71	1.98e-11	1.0332	49901000	10298000
265	HNRNPU	Heterogeneous nuclear ribonucleoprotein U	609	0.511314		CLFAGFQRKAVVVCPKDEDYKQRTQKKAEVE	_AVVVCPK(gl)DEDYK_	1	92.925	0.00215006	0.072312	2517900	574670
266	HNRNPU	Heterogeneous nuclear ribonucleoprotein U	637	0.461777		EVEGKDLPEHAVLKMKGNFTLPEVAECFDEI	_M(ox)K(gl)GNFTLPE_	1	65.347	0.00465193	-0.38622	2571700	568390
267	HNRNPU	Heterogeneous nuclear ribonucleoprotein U	524			GKTTWVTKHAAENPGKYNILGTNTIMDKMMV	_HAAENPGK(gl)YNILGTNTIM(ox)DK_	1	81.356	3.3e-07	-0.083394	4713700	0
268	HNRNPU	Heterogeneous nuclear ribonucleoprotein U	635			KAEVEGKDLPEHAVLKMKGNFTLPEVAECFD	_DLPEHAVLK(gl)M(ox)K_	1	39.785	0.03584	0.40095	6270300	0
269	HNRNPUL1		17	1.92339		DNITRQNQFYDTQVIKQENESGYERRPLEME	_(ac)M(ox)DNITRQNQFYDTQVIK(gl)QE_	1	57.496	0.000294	-0.19627	2234700	2485100
270	HOOK3;HOOK3	Protein Hook homolog 3	547	0.375478		QDQGSKAEDSVLLKKKLEEHLEKLHEANNEL	_K(gl)LEEHLEK_	1	32.633	0.033936	-0.16146	104470000	19288000
271	HOXB9	Homeobox protein Hox-B9	117	1.40941		APRGEAAPGQGQAAVKAEPLLGAPGELLKQG	_AAPGQGQAAVK(gl)AEPLLGAPGELLK_	1	47.058	0.00198225	-0.44118	1907400	1308100
272	HOXC10;HOXC10	Homeobox protein Hox-C10	215			ETPKSDSQTPSPNEIKTEQSLAGPKGSPSES	_SDSQTPSPNEIK(gl)TEQSLAGPK_	1	46.982	9.6e-19	0.35971	0	0
273	HSF1;HSF1;HSF1	Heat shock factor protein 1	126			LLENIKRKVTSVSTLKSEDIKIRQDSVTKLL	_VTSVSTLK(gl)SEDIK_	1	64.798	0.00535705	0.76447	3610900	0
274	HSF2	Heat shock factor protein 2	139	0.5755		EDLTKIISSAQKVQIKQETIESRLSELKSEN	_VQIK(gl)QETIESRLSELK_	1	64.565	0.000808194	0.081493	2851400	607410
275	HSF2	Heat shock factor protein 2	82	0.509608		MYGFRKVVHIDSGIVKQERDGPVEFQHPYFK	_VVHIDSGIVK(gl)QERDGPVEFQHPYFK_	1	68.44	0.000422204	-1.3413	7756800	1749600
276	HSP90AA2;HSP90AA4P	Putative heat shock protein HSP 90-alpha A2;Putative heat shock protein HSP 90-alpha A4	69			DALDKIWYESLTDPSKLDSGKELHINLIPNK	_SLTDPSK(gl)LDSGK_	1	50.562	0.0142054	-0.23674	604720	0
277	HSP90AB1;HSP90AB3P	Heat shock protein HSP 90-beta;Putative heat shock protein HSP 90-beta-3	72	0.207165		ESLTDPSKLDSGKELKIDIIPNPQERTLTLV	_ELK(gl)IDIIPNPQERTLTLVDTGIGM(ox)TK_	1	100.02	6.45e-13	0.56318	4946100	213400
278	HSP90AB1;HSP90AB3P;HSP90AA1;HSP90AA1;HSP90AB1;HSP90AB1;HSP90AB1	Heat shock protein HSP 90-beta;Putative heat shock protein HSP 90-beta-3;Heat shock protein HSP 90-alpha	399	0.389701		EDLPLNISREMLQQSKILKVIRKNIVKKCLE	_MLQQSK(gl)ILK_	1	97.911	0.00198161	0.33068	6840500	829170
279	HSP90AB1;HSP90AB3P;HSP90AA1;HSP90AB2P;HSP90AB1;HSP90AA1	Heat shock protein HSP 90-beta;Putative heat shock protein HSP 90-beta-3;Heat shock protein HSP 90-alpha;Putative heat shock protein HSP 90-beta 2	64			DALDKIRYESLTDPSKLDSGKELKIDIIPNP	_SLTDPSK(gl)LDSGK_	1	50.562	2.93e-08	-0.23674	604720	0
280	HSP90AB1;HSP90AB3P;HSP90AB1	Heat shock protein HSP 90-beta;Putative heat shock protein HSP 90-beta-3	186			HGEPIGRGTKVILHLKEDQTEYLEERRVKEV	_VILHLK(gl)EDQTEYLEERRVK_	1	37.624	0.0180451	-1.0394	1463000	0
281	HSP90AB1;HSP90AB3P;HSP90AB2P	Heat shock protein HSP 90-beta;Putative heat shock protein HSP 90-beta-3;Putative heat shock protein HSP 90-beta 2	538			QQLKEFDGKSLVSVTKEGLELPEDEEEKKKM	_SLVSVTK(gl)E_	1	65.347	0.0315724	0.85974	461300	0
282	HSPA1A;HSPA1B;HSPA1A;HSPA1A	Heat shock 70 kDa protein 1A/1B	526	0.918906		SKEEIERMVQEAEKYKAEDEVQRERVSAKNA	_YK(gl)AEDEVQRERVSAK_	1	40.237	0.0280304	0.84563	1384900	535150
283	HSPA1A;HSPA1B;HSPA1A;HSPA1A;HSPA8;HSPA6;HSPA1L;HSPA1L;HSPA2;HSPA8;HSPA1L;HSPA1L;HSPA8;HSPA8;HSPA8;HSPA8	Heat shock 70 kDa protein 1A/1B;Heat shock cognate 71 kDa protein;Heat shock 70 kDa protein 6;Heat shock 70 kDa protein 1-like;Heat shock-related 70 kDa protein 2	507	0.73443		DKSTGKANKITITNDKGRLSKEEIERMVQEA	_ITITNDK(gl)GRLSK_	1	144.46	3.4e-11	0.53918	63700000	28239000
284	HSPA1A;HSPA1B;HSPA1A;HSPA1A;HSPA8;HSPA6;HSPA1L;HSPA1L;HSPA2;HSPA8;HSPA1L;HSPA1L;HSPA8;HSPA8;HSPA8;HSPA8	Heat shock 70 kDa protein 1A/1B;Heat shock cognate 71 kDa protein;Heat shock 70 kDa protein 6;Heat shock 70 kDa protein 1-like;Heat shock-related 70 kDa protein 2	512	0.50658		KANKITITNDKGRLSKEEIERMVQEAEKYKA	_GRLSK(gl)EEIERM(ox)VQEAEK_	1	87.157	2.09e-06	-0.75973	5735800	1654000
285	HSPA5	78 kDa glucose-regulated protein	352	0.323724		STMKPVQKVLEDSDLKKSDIDEIVLVGGSTR	_VLEDSDLK(gl)K_	1	140.14	2.22e-16	0.78646	3299800000	394280000
286	HTATSF1	HIV Tat-specific factor 1	429	0.982282		QETATGMAFEEPIDEKKFEKTEDGGEFEEGA	_M(ox)NAQETATGM(ox)AFEEPIDEK(gl)K_	1	162.33	1.34e-29	0.25752	3292400	955010
287	HTATSF1;HTATSF1	HIV Tat-specific factor 1	221			IRGYKLHVEVAKFQLKGEYDASKKKKKCKDY	_FQLK(gl)GEYDASK_	1	35.204	0.0334416	0.6221	512490	0
288	IFI16;IFI16	Gamma-interferon-inducible protein 16	561	0.362065		STPSSSFLTTLKPRLKTEPEEVSIEDSAQSD	_PRLK(gl)TEPEEVSIEDSAQSDLK_	1	124.69	1.12e-16	0.38426	11378000	959180
289	IFI16;IFI16;IFI16	Gamma-interferon-inducible protein 16	116	0.433416		EVDATSPAPSTSSTVKTEGAEATPGAQKRKK	_EVDATSPAPSTSSTVK(gl)TEGAEATPGAQK_	1	122.78	7.65e-23	0.79658	17270000	1504500
290	IGF2BP1	Insulin-like growth factor 2 mRNA-binding protein 1	330	0.520078		LQDLTLYNPERTITVKGAIENCCRAEQEIMK	_RTITVK(gl)GAIE_	1	79.82	0.00809364	-0.20117	1587100	455610
291	IGF2BP1	Insulin-like growth factor 2 mRNA-binding protein 1	309	0.439621		KEGRNLKKVEQDTETKITISSLQDLTLYNPE	_TK(gl)ITISSLQD_	1	103.22	0.00087002	-0.058671	2661000	642290
292	IGF2BP1	Insulin-like growth factor 2 mRNA-binding protein 1	561	0.41416		SQMAQRKIRDILAQVKQQHQKGQSNQAQARR	_IRDILAQVK(gl)QQHQK_	1	91.307	0.000164429	-0.1723	6526000	1501400
293	IGF2BP1	Insulin-like growth factor 2 mRNA-binding protein 1	440	0.368206		GQHIKQLSRFASASIKIAPPETPDSKVRMVI	_(gl)QLSRFASASIK(gl)IAPPETPDSK_	1	59.814	3.19e-05	1.1961	1119700	83800
294	IGF2BP1	Insulin-like growth factor 2 mRNA-binding protein 1	475	0.343385		PEAQFKAQGRIYGKLKEENFFGPKEEVKLET	_LK(gl)EENFFGPK_	1	157.38	1.17e-11	0.44565	28887000	4498100
295	IGF2BP1	Insulin-like growth factor 2 mRNA-binding protein 1	487	0.29242		GKLKEENFFGPKEEVKLETHIRVPASAAGRV	_EEVK(gl)LETHIRVPASAAGRVIGK_	1	145.14	5.56e-23	-0.098342	12918000	1783600
296	IGF2BP1	Insulin-like growth factor 2 mRNA-binding protein 1	450	0.197026		ASASIKIAPPETPDSKVRMVIITGPPEAQFK	_IAPPETPDSK(gl)VRM(ox)VIITGPPEAQFK_	1	49.25	0.00022249	-0.19727	4302000	324700
297	IGF2BP2;IGF2BP2	Insulin-like growth factor 2 mRNA-binding protein 2	503	0.719119		PEAQFKAQGRIFGKLKEENFFNPKEEVKLEA	_LK(gl)EENFFNPK_	1	112.13	2.98e-06	0.23602	8313900	1033100
298	IGF2BP3	Insulin-like growth factor 2 mRNA-binding protein 3	330	0.49999		LQELTLYNPERTITVKGNVETCAKAEEEIMK	_RTITVK(gl)GNVE_	1	63.408	0.0209055	0.53044	574400	99434
299	IGF2BP3;IGF2BP1	Insulin-like growth factor 2 mRNA-binding protein 3;Insulin-like growth factor 2 mRNA-binding protein 1	228	0.583667		KEGATIRNITKQTQSKIDVHRKENAGAAEKA;KEGATIRNITKQTQSKIDVHRKENAGAAEKS	_(gl)QTQSK(gl)IDVHRK_	1	73.632	0.00251	-0.036619	7012300	2243300
300	IGF2BP3;IGF2BP1	Insulin-like growth factor 2 mRNA-binding protein 3;Insulin-like growth factor 2 mRNA-binding protein 1	223			GAIIGKEGATIRNITKQTQSKIDVHRKENAG	_EGATIRNITK(gl)QTQSK_	1	74.966	0.000167563	0.69429	1859800	0
301	IK	Protein Red	404			VDDEPMDVDKGPGSTKELIKSINEKFAGSAG	_GPGSTK(gl)ELIK_	1	43.405	0.03664	1.1136	850480	0
302	ILF2	Interleukin enhancer-binding factor 2	59	3.03338		VKPAPDETSFSEALLKRNQDLAPNSAEQASI	_ALLK(gl)RNQDLAPNSAE_	1	42.568	0.0116862	-0.38277	1827900	2428300
303	ILF2	Interleukin enhancer-binding factor 2	45	1.54264		IPFDFYLCEMAFPRVKPAPDETSFSEALLKR	_M(ox)AFPRVK(gl)PAPDETSFSE_	1	35.091	0.0265751	-0.16119	4844300	3689700
304	ILF3;ILF3	Interleukin enhancer-binding factor 3	489	0.397975		RDSSKGEDSAEETEAKPAVVAPAPVVEAVST	_AK(gl)PAVVAPAPVVE_	1	95.656	3.67e-05	-0.32906	52468000	10070000
305	IMMT	Mitochondrial inner membrane protein	180			PEESLKTDHPEIGEGKPTPALSEEASSSSIR	_GK(gl)PTPALSEE_	1	85.821	8.29e-34	-0.48729	0	0
306	INTS12;INTS12;INTS12;INTS12	Integrator complex subunit 12	68			DVEPPKISSTKNISIKQEPKISSSLPSGNNN	_NISIK(gl)QEPK_	1	57.174	0.0246159	0.26917	1015800	0
307	INTS7	Integrator complex subunit 7	867			LNVSSTLQSKSGQDYKIPIDNMTNEMEQRVE	_SGQDYK(gl)IPIDNM(ox)TNE_	1	63.681	0.00113058	0.47272	1321600	0
308	IRF2	Interferon regulatory factor 2	166	0.802198		VSDLSPEYAVLTSTIKNEVDSTVNIIVVGQS	_YAVLTSTIK(gl)NE_	1	99.283	0.000133781	-0.23377	4816500	798200
309	IST1;IST1;IST1;IST1	IST1 homolog	218			GVETDLIDVGFTDDVKKGGPGRGGSGGFTAP	_TDLIDVGFTDDVK(gl)K_	1	40.025	0.007183	0.61275	0	0
310	KAT6B	Histone acetyltransferase KAT6B	673	0.531486		IKPDQDDDTEIKINIKQESADVNVIGNKDVV	_INIK(gl)QESADVNVIGNK_	1	178.03	6.22e-20	-0.049814	11934000	3058700
311	KCTD15	BTB/POZ domain-containing protein KCTD15	278	0.790576		REERRPQPTPTAVRIKQEPLD__________	_RRPQPTPTAVRIK(gl)QEPLD_	1	110.9	1.06e-10	0.020799	16297000	7147400
312	KCTD7	BTB/POZ domain-containing protein KCTD7	148	0.401387		AIGPLLEQLENMQPLKGEKVRQAFLGLMPYY	_N(de)M(ox)QPLK(gl)GEK_	1	49.081	0.0119291	-1.1114	4126600	806590
313	KDM2B	Lysine-specific demethylase 2B	890	0.744857		AEDRMALANKPLRRFKQEPEDELPEAPPKTR	_PLRRFK(gl)QEPEDELPEAPPK_	1	115.26	3.64e-10	0.0095892	14163000	5274400
314	KDM5C;JARID1C	Lysine-specific demethylase 5C	282	1.36025		CPPTVVVKEELGGDVKVESTSPKTFLESKEE	_LGGDVK(gl)VE_	1	70.256	0.0156609	-0.47638	1211000	964550
315	KHDRBS1	KH domain-containing, RNA-binding, signal transduction-associated protein 1	175			VLIPVKQYPKFNFVGKILGPQGNTIKRLQEE	_FNFVGK(gl)ILGPQGNTIK_	1	64.565	2.02e-07	-0.82081	0	0
316	KHDRBS1	KH domain-containing, RNA-binding, signal transduction-associated protein 1	102			LPPSATASVKMEPENKYLPELMAEKDSLDPS	_M(ox)EPENK(gl)YLPELM(ox)AEK_	1	52.569	0.00894468	0.15488	14828000	0
317	KIAA1429	Protein virilizer homolog	533	0.915025		EAFLRGRQNEKSGYQKLLELILLDQTVRVVT	_SGYQ(de)K(gl)LLE_	1	49.418	0.0125	-0.17072	1926400	958730
318	KIAA1958;KIAA1958	Uncharacterized protein KIAA1958	204			QMVDECSNDVIIKKIKQEIPEDYYIVANAEL	_IK(gl)QEIPE_	1	77.058	3.03e-09	0.072401	0	0
319	KRR1	KRR1 small subunit processome component homolog	340	0.387462		KEKPIVKPKEASTETKIDVASIKEKVKKAKN	_TK(gl)IDVASIK_	1	99.283	0.000295954	-0.088286	15915000	2885700
320	KRR1	KRR1 small subunit processome component homolog	369			KNKKLGALTAEEIALKMEADEKKKKKKK___	_LGALTAEEIALK(gl)M(ox)EADEK_	1	83.253	1.46e-06	1.0816	3928600	0
321	KRT5;KRT6A;KRT6B;KRT6C;KRT75;KRT5;KRT2;KRT76;KRT3;KRT84;KRT79;KRT8P11;KRT8;KRT7;KRT7;KRT8;KRT8;KRT8;KRT8	Keratin, type II cytoskeletal 5;Keratin, type II cytoskeletal 6A;Keratin, type II cytoskeletal 6B;Keratin, type II cytoskeletal 6C;Keratin, type II cytoskeletal 75;Keratin, type II cytoskeletal 2 epidermal;Keratin, type II cytoskeletal 2 oral;Keratin, type II cytoskeletal 3;Keratin, type II cuticular Hb4;Keratin, type II cytoskeletal 79;Keratin, type II cytoskeletal 8;Keratin, type II cytoskeleta…	179			RVRTEEREQIKTLNNKFASFIDKVRFLEQQN	_TLNNK(gl)FASFIDK_	1	31.827	0.0423584	-0.067173	1654800	0
322	L3MBTL2	Lethal(3)malignant brain tumor-like protein 2	675	1.21975		ISSEPVPGEIIAVRVKEEHLDVASPDKASSP	_IIAVRVK(gl)EE_	1	101.11	0.00755427	0.29964	509600	304730
323	LARP7;LARP7;LARP7	La-related protein 7	410	0.680351		QKASMASLKKTISQIKSESEMETDSGVPQNT	_TISQIK(gl)SESE_	1	72.2	0.0134238	-0.19702	3864700	1067500
324	LAS1L	Ribosomal biogenesis protein LAS1L	565			AKAQQQEEQGSVNDVKEEEKEEKEVLPDQVE	_(gl)QGSVNDVK(gl)EEEK_	1	93.348	0.000208	1.1884	617540	0
325	LCOR	Ligand-dependent corepressor	414	0.648429		KKMKLMRSEGPDVSVKIELDPQGEAAQSANE	_LM(ox)RSEGPDVSVK(gl)IE_	1	68.972	0.000487218	-0.85651	2568700	723790
326	LMNA;LMNA;LMNA;LMNA	Prelamin-A/C;Lamin-A/C	378	1.36441		LDIKLALDMEIHAYRKLLEGEEERLRLSPSP	_IHAYRK(gl)LLE_	1	74.962	0.00372502	-0.10509	2148000	1629800
327	LMNB1;LMNB1	Lamin-B1	271	2.79369		QVRLYKEELEQTYHAKLENARLSSEMNTSTV	_(gl)QTYHAK(gl)LE_	1	49.777	0.0222	-1.9757	819650	1029900
328	LMNB1;LMNB1	Lamin-B1	312	2.31752		RMRIESLSSQLSNLQKESRACLERIQELEDL	_SLSSQLSNLQK(gl)E_	1	51.286	0.00196236	-1.0679	486220	625770
329	LMNB1;LMNB1	Lamin-B1	241	1.29074		RLVEVDSGRQIEYEYKLAQALHEMREQHDAQ	_YK(gl)LAQALHE_	1	88.495	0.00295269	-0.6551	1869300	1155200
330	LMNB2	Lamin-B2	275	10.4329		LEELRSQHDEQVRLYKLELEQTYQAKLDSAK	_(gl)QVRLYK(gl)LE_	1	52.79	0.0209693	0.5104	341530	1668300
331	LMNB2	Lamin-B2	77	4.25654		DRVRALELENDRLLLKISEKEEVTTREVSGI	_NDRLLLK(gl)ISEK_	1	38.178	0.00726	-0.40624	373620	678450
332	MAFG	Transcription factor MafG	14	0.897283		__MTTPNKGNKALKVKREPGENGTSLTDEEL	_VK(gl)REPGENGTSLTDEE_	1	61.732	0.00039643	0.52903	2970000	1495000
333	MATR3		764			AFKSGDKNDDGLVEIKVDKIEELDQENEAAL	_NDDGLVEIK(gl)VDK_	1	71.697	0.00436963	-0.1684	2340100	0
334	MATR3;MATR3;MATR3;MATR3	Matrin-3	588	0.5098		KKLVLRIPNRGIDLLKKDKSRKRSYSPDGKE	_LVLRIPNRGIDLLK(gl)K_	1	80.382	0.000108006	-0.30968	6145600	1837300
335	MATR3;MATR3;MATR3;MATR3	Matrin-3	784	0.487665		EELDQENEAALENGIKNEENTEPGAESSENA	_AALEN(de)GIK(gl)NEE_	1	72.652	0.00178	0.20325	9892800	908580
336	MATR3;MATR3;MATR3;MATR3;MATR3	Matrin-3	245	1.59062		CRDDSFFGETSHNYHKFDSEYERMGRGPGPL	_TSHNYHK(gl)FDSEYE_	1	69.03	0.000761375	0.7183	3691500	3553600
337	MATR3;MATR3;MATR3;MATR3;MATR3	Matrin-3	692	0.478517		DETDLANLGDVASDGKKEPSDKAVKKDGSAS	_TDLANLGDVASDGK(gl)K_	1	140.32	4.79e-14	0.32425	22395000	4614900
338	MATR3;MATR3;MATR3;MATR3;MATR3;MATR3	Matrin-3	491	0.605908		RIKKPEGKPDQKFDQKQELGRVIHLSNLPHS	_FDQK(gl)QELGRVIHLSNLPHSGYSDSAVLK_	1	37.637	0.0102227	0.55326	10212000	1852000
339	MATR3;MATR3;MATR3;MATR3;MATR3;MATR3	Matrin-3	473	0.581641		PALVFGKPVRVHLSQKYKRIKKPEGKPDQKF	_PVRVHLSQK(gl)YK_	1	52.265	0.0222202	1.0093	1258600	159530
340	MATR3;MATR3;MATR3;MATR3;MATR3;MATR3	Matrin-3	522	0.535666		GYSDSAVLKLAEPYGKIKNYILMRMKSQAFI	_LAEPYGK(gl)IK_	1	72.652	0.00179102	0.31786	3074000	937660
341	MATR3;MATR3;MATR3;MATR3;MATR3;MATR3	Matrin-3	515			LSNLPHSGYSDSAVLKLAEPYGKIKNYILMR	_SAVLK(gl)LAEPYGK_	1	81.431	3.34e-06	0.63204	0	0
342	MATR3;MATR3;MATR3;MATR3;MATR3;MATR3;MATR3;MATR3;MATR3;MATR3	Matrin-3	3	0.553813		_____________MSKSFQQSSLSRDSQGHG	_(ac)SK(gl)SFQQSSLSRD_	1	89.013	0.000682106	0.2272	1015700	154850
343	MBD1		134	0.933236		VPGPVAASTEALLQVKQEKADTQDEWTPGTA	_ALLQVK(gl)QE_	1	80.165	0.00792086	0.55279	2035600	887300
344	MBD1;MBD1	Methyl-CpG-binding domain protein 1	90	0.615717		LATRTAQPDHTQAPTKQEAGGGFVLPPPGTD	_PTLATRTAQPDHTQAPTK(gl)QE_	1	74.953	1.12e-07	0.016588	6602400	2325000
345	MBD1;MBD1	Methyl-CpG-binding domain protein 1	173	0.338011		PGCPSKAVDPGLPSVKQEPPDPEEDKEENKD	_AVDPGLPSVK(gl)QEPPDPEEDKEENK_	1	110.4	9.22e-12	-0.18225	52397000	7334100
346	MBIP;MBIP;MBIP;MBIP;MBIP;MBIP	MAP3K12-binding inhibitory protein 1	94			ILYLQPFLAKLQSPIKEENTTAVEEIGRTEM	_LQSPIK(gl)EE_	1	53.756	6.42e-06	0.47526	0	0
347	MBTD1	MBT domain-containing protein 1	596	0.677131		SQQYKGHKKMTTLQLKEELLDGEDYNFLQGA	_M(ox)TTLQLK(gl)EE_	1	65.535	0.00696171	-0.59489	3999600	1537500
348	MDC1;MDC1;MDC1;MDC1;MDC1;MDC1;MDC1	Mediator of DNA damage checkpoint protein 1	1840	0.779125		KQPQRGEVSQKTVIIKEEEEDTAEKPGKEED	_TVIIK(gl)EEEE_	1	73.985	0.0244754	0.41257	1210700	422290
349	MDC1;MDC1;MDC1;MDC1;MDC1;MDC1;MDC1	Mediator of DNA damage checkpoint protein 1	2071	0.610834		GLPLLSPEFLLTGVLKQEAKPEAFVLSPLEM	_FLLTGVLK(gl)QE_	1	68.786	0.00222055	0.54749	2967700	885570
350	MDC1;MDC1;MDC1;MDC1;MDC1;MDC1;MDC1	Mediator of DNA damage checkpoint protein 1	616			PAEGDAGAEWAAAVLKQERAHEVGAQGGPPV	_WAAAVLK(gl)QE_	1	59.931	0.0343229	-0.54024	1952400	0
351	MDC1;MDC1;MDC1;MDC1;MDC1;MDC1;MDC1	Mediator of DNA damage checkpoint protein 1	420			DDEEEVSAALTLAHLKESQPAIWNRDAEEDM	_VSAALTLAHLK(gl)E_	1	45.115	0.0331745	0.12834	684560	0
352	MED7	Mediator of RNA polymerase II transcription subunit 7	185	0.271949		SLPDDLPHSEAGMRVKTEPMDADDSNNCTGQ	_AGM(ox)RVK(gl)TEPM(ox)DADDSNNCTGQNE_	1	33.676	0.00224134	-0.25085	2935500	278230
353	MEPCE	7SK snRNA methylphosphate capping enzyme	21	0.205882		AEKEPFLVPAPPPPLKDESGGGGGPTVPPHQ	_EPFLVPAPPPPLK(gl)DE_	1	37.177	0.0378069	0.33404	2215000	298450
354	METAP1;METAP1	Methionine aminopeptidase 1;Methionine aminopeptidase	123	0.842373		YADHPLGMSESEQALKGTSQIKLLSSEDIEG	_(gl)QALK(gl)GTSQIK_	1	55.401	0.00526575	0.20637	916420	390450
355	MGA;MGA;MGA	MAX gene-associated protein	2629	0.841712		GPVVAVSPDLLESDLKPQVAGSAVALPENDD	_SDLK(gl)PQVAGSAVALPE_	1	38.093	0.0143164	0.66536	996300	422750
356	MKI67	Antigen KI-67	1035			HTKQQLKASLGKVGVKEELLAVGKFTRTSGE	_VGVK(gl)EELLAVGK_	1	103.43	0.000128115	0.059587	7142800	0
357	MKI67	Antigen KI-67	2009			SSKQRLKISLGKVGVKEEVLPVGKLTQTSGK	_VGVK(gl)EEVLPVGK_	1	87.566	0.00099803	0.62173	2069300	0
358	MKI67	Antigen KI-67	2852			SSKRRPRTRAQKVEVKEELLAVGKLTQTSGE	_VEVK(gl)EELLAVGK_	1	57.802	0.0123546	0.11324	955320	0
359	MKI67	Antigen KI-67	892			RSTEFRNIQKLPVESKSEETNTEIVECILKR	_LPVESK(gl)SEE_	1	44.98	0.0342685	1.5562	1273400	0
360	MKI67IP;MKI67IP;MKI67IP	MKI67 FHA domain-interacting nucleolar phosphoprotein	192			AKKGIDYDFPSLILQKTESISKTNRQTSTKG	_GIDYDFPSLILQK(gl)TESISK_	1	67.43	7.33e-10	-0.15785	0	0
361	MORC3	MORC family CW-type zinc finger protein 3	597	1.13012		ENSTPKPAVDHDIDMKSEQSHVEQGGVQVEF	_PAVDHDIDMK(gl)SE_	1	72.152	0.00203392	-0.16431	8863300	5492600
362	MORC3	MORC family CW-type zinc finger protein 3	650	0.96631		GNTAATQTEVPSLVVKKEETVEDEIDVRNDA	_VPSLVVK(gl)K_	1	98.754	0.00552779	0.15811	11187000	5463000
363	MORC3;MORC3;MORC3	MORC family CW-type zinc finger protein 3	794	0.817935		EIERLKKQCSALQHVKAECSQCSNNESKSEM	_(gl)QCSALQHVK(gl)AE_	1	82.362	0.000401436	-0.37925	1160700	343420
364	MPHOSPH10;MPHOSPH10	U3 small nucleolar ribonucleoprotein protein MPP10	350			LPDDAETEDTGVLNVKKNSDEVKSSFEKRQE	_DTGVLNVK(gl)K_	1	89.548	1.24e-42	-0.82102	0	0
365	MSH2	DNA mismatch repair protein Msh2	912			TEMSEENITIKLKQLKAEVIAKNNSFVNEII	_(gl)QLK(gl)AEVIAK_	1	73.435	4.12e-05	0.11806	0	0
366	MSI2		527			NTYILPKDSQVGPDVKSEAAPKRALYESVFG	_DSQVGPDVK(gl)SE_	1	80.979	0.00290904	-0.068388	652650	0
367	MSL2	Male-specific lethal 2 homolog	375	0.424247		IIRGPTLGASAPVTVKRESKISLQPIATVPN	_VQPLPISTIIRGPTLGASAPVTVK(gl)RE_	1	41.763	0.00375753	0.89637	518220	72975
368	MST4;STK25;MST4;MST4;STK25;STK25;STK25;STK25;STK25;STK25;STK25;STK25	Serine/threonine-protein kinase 25;Serine/threonine-protein kinase MST4	181			DIKAANVLLSEQGDVKLADFGVAGQLTDTQI	_(gl)QGDVK(gl)LADFGVAGQLTDTQIK_	1	46.178	0.00210285	0.60838	668470	0
369	MYBBP1A	Myb-binding protein 1A	1148	0.54185		DLYWQAMKTLGVQRPKLEKKDAKEIPSATQS	_TLGVQRPK(gl)LEK_	1	70.281	0.00184833	0.24441	1950700	437950
370	MYEF2	Myelin expression factor 2	53			AEKQQPQHSSSSNGVKMENDESAKEEKSDLK	_(gl)QQPQHSSSSNGVK(gl)M(ox)ENDESAK_	1	81.665	6.86e-10	0.76223	596950	0
371	MYEF2	Myelin expression factor 2	174			ETMNKYDLSGRPLNIKEDPDGENARRALQRT	_YDLSGRPLNIK(gl)EDPDGE_	1	49.049	0.00192512	0.8654	652180	0
372	MYO1B;MYO1B;MYO1B	Unconventional myosin-Ib	287	0.576822		LAVVAAVLKLGNIEFKPESRVNGLDESKIKD	_LGNIEFK(gl)PESRVNGLDESK_	1	54.658	0.00109602	0.39752	3164700	531530
373		Putative TAF11-like protein ENSP00000332601	185			LQPKHLREAVRRLKPKGLFPNSNYKKIMF__	_PK(gl)GLFPNSNYK_	1	36.284	0.0300627	1.0632	2038500	0
374	NACC1	Nucleus accumbens-associated protein 1	483			RRVVRKSWMPKVKVLKAEDDAYTTFISETGK	_VLK(gl)AEDDAYTTFISETGK_	1	105.9	2.8e-08	-0.88062	2998400	0
375	NCL	Nucleolin	377	0.302634		KALELTGLKVFGNEIKLEKPKGKDSKKERDA	_VFGNEIK(gl)LEK_	1	157.86	1.02e-12	0.30608	106010000	15132000
376	NCL	Nucleolin	324			LFVGNLNFNKSAPELKTGISDVFAKNDLAVV	_SAPELK(gl)TGISDVFAK_	1	36.193	0.0310153	-0.66089	1702700	0
377	NCL;NCL	Nucleolin	577			GSPNARSQPSKTLFVKGLSEDTTEETLKESF	_TLFVK(gl)GLSEDTTEETLK_	1	95.767	6.53e-07	0.4653	3707900	0
378	NCL;NCL	Nucleolin	624			SKGFGFVDFNSEEDAKAAKEAMEDGEIDGNK	_GFGFVDFNSEEDAK(gl)AAK_	1	85.619	3.13e-06	0.3656	2474500	0
379	NCL;NCL	Nucleolin	486			QDYRGGKNSTWSGESKTLVLSNLSYSATEET	_SK(gl)TLVLSNLSYSATEE_	1	41.871	0.036842	0.24114	1254700	0
380	NDRG1;NDRG1;NDRG1;NDRG1;NDRG1;NDRG1;NDRG1	Protein NDRG1	14			__MSREMQDVDLAEVKPLVEKGETITGLLQE	_(ac)SREM(ox)QDVDLAEVK(gl)PLVEK_	1	67.995	8.67e-05	0.72985	523120	0
381	NFAT5;NFAT5	Nuclear factor of activated T-cells 5	574			YTPDPAAAGALNVNVKKEISSPARPCSFEEA	_VQPFTYTPDPAAAGALNVNVK(gl)K_	1	57.496	0.000304082	0.70661	657860	0
382	NFIL3	Nuclear factor interleukin-3-regulated protein	219	0.693103		VQGSCRSPENKFQIIKQEPMELESYTREPRD	_FQIIK(gl)QEPM(ox)ELE_	1	54.772	0.00535855	0.12418	4849500	1888800
383	NHP2;NHP2;NHP2	H/ACA ribonucleoprotein complex subunit 2	5	0.92396		___________MTKIKADPDGPEAQAEACSG	_IK(gl)ADPDGPEAQAE_	1	116.71	1.08e-12	0.72359	179080000	466580
384	NKAP	NF-kappa-B-activating protein	283			ESQEEFLENPWKDRTKAEEPSDLIGPEAPKT	_DRTK(gl)AEEPSDLIGPEAPK_	1	38.417	1.72e-07	-0.59549	0	0
385	NKRF;NKRF	NF-kappa-B-repressing factor	96	1.09014		SSKDERQEDPYGPQTKEVNEQTHFASMPRDI	_DERQEDPYGPQTK(gl)E_	1	82.529	8.83e-06	0.38257	1955200	1108100
386	NKRF;NKRF	NF-kappa-B-repressing factor	565	0.729546		EIQGRSAEEAYKQQIKEDNIGNQLLRKMGWT	_(gl)QQIK(gl)EDNIGNQLLRK_	1	157.38	6.26e-19	-0.1816	7747500	2520900
387	NKRF;NKRF	NF-kappa-B-repressing factor	598	0.647682		GLGKSGEGIREPISVKEQHKREGLGLDVERV	_SGEGIREPISVK(gl)EQHK_	1	89.311	2.66e-06	-0.060518	6081700	445630
388	NKRF;NKRF	NF-kappa-B-repressing factor	689	0.571512		VVGRKRRKEDLLDQLKQEGQVGHYELVMPQA	_EDLLDQLK(gl)QEGQVGHYELVM(ox)PQAN_	1	93.096	1.94e-07	0.12125	20495000	6147300
389	NKRF;NKRF	NF-kappa-B-repressing factor	515			ESEVIAEAVGVKKTVKYEAAGEAVKTLKKTQ	_TVK(gl)YEAAGEAVK_	1	85.457	0.00128042	0.75425	7878300	0
390	NKRF;NKRF	NF-kappa-B-repressing factor	538			VKTLKKTQPTVINNLKKGAVEDVISRNEIQG	_TQPTVINNLK(gl)K_	1	78.653	0.00333656	0.28033	1677800	0
391	NOL9	Polynucleotide 5'-hydroxyl-kinase NOL9	255			GSSYIFVQESPTPQIKPEYLALRSVGIRREK	_SPTPQIK(gl)PE_	1	45.598	0.0259756	-0.28483	367220	0
392	NOLC1	Nucleolar and coiled-body phosphoprotein 1	614			NEAAKEAETPQAKKIKLQTPNTFPKRKKGEK	_IK(gl)LQTPNTFPK_	1	64.64	0.0115335	-0.018699	1554100	0
393	NOLC1	Nucleolar and coiled-body phosphoprotein 1	425			VKPAAAPKQPVGGGQKLLTRKADSSSSEEES	_(gl)QPVGGGQK(gl)LLTRK_	1	41.092	0.0147025	1.1233	0	0
394	NOMO2;NOMO3;NOMO1	Nodal modulator 2;Nodal modulator 3;Nodal modulator 1	159			PAGVQVSLRNTGTEAKIQSTVTQPGGKFAFF	_AK(gl)IQSTVTQPGGK_	1	87.498	0.0061507	0.47027	1813100	0
395	NONO	Non-POU domain-containing octamer-binding protein	371	0.572088		RRQQEEMMRRQQEGFKGTFPDAREQEIRMGQ	_GFK(gl)GTFPDAREQE_	1	87.138	0.000140901	1.3517	9709000	2947900
396	NONO;NONO	Non-POU domain-containing octamer-binding protein	243	0.55006		DQLDDEEGLPEKLVIKNQQFHKEREQPPRFA	_LVIK(gl)NQQFHK_	1	163.34	1.74e-15	-0.26687	160300000	42362000
397	NONO;NONO;NONO	Non-POU domain-containing octamer-binding protein	290	0.676129		IEMEKQQQDQVDRNIKEAREKLEMEMEAARH	_QQQDQVDRNIK(gl)EAREK_	1	78.285	9.83e-06	-0.344	7007700	1837600
398	NONO;NONO;NONO	Non-POU domain-containing octamer-binding protein	198	0.413819		DRGRPSGKGIVEFSGKPAARKALDRCSEGSF	_GIVEFSGK(gl)PAARK_	1	142.1	2.24e-11	0.058593	33185000	6858300
399	NONO;NONO;NONO;NONO	Non-POU domain-containing octamer-binding protein	99			DITEEEMRKLFEKYGKAGEVFIHKDKGFGFI	_YGK(gl)AGEVFIHK_	1	75.764	0.00452662	0.19482	3078400	0
400	NONO;NONO;NONO;NONO;NONO	Non-POU domain-containing octamer-binding protein	96	0.661053		LPPDITEEEMRKLFEKYGKAGEVFIHKDKGF;LPPDITEEEMRKLFEKYGKETRTLAEIAKVE	_LFEK(gl)YGK_	1	98.044	0.000186064	0.20114	16131000	3721700
401	NONO;NONO;NONO;NONO;NONO	Non-POU domain-containing octamer-binding protein	60	0.476065		GQQASSQNEGLTIDLKNFRKPGEKTFTQRSR	_GLTIDLK(gl)NFRK_	1	128.54	1.94e-06	-0.15453	29627000	6850000
402	NONO;NONO;NONO;NONO;NONO	Non-POU domain-containing octamer-binding protein	5	0.467769		___________MQSNKTFNLEKQNHTPRKHH	_(ac)M(ox)QSNK(gl)TFNLEK_	1	167.44	4.62e-16	0.035268	15695000	3634600
403	NOP2	Putative ribosomal RNA methyltransferase NOP2	648			ETATPTNVDLPQVIPKSENSSQPAKKAKGAA	_TATPTNVDLPQVIPK(gl)SE_	1	41.871	0.035475	-0.0096639	1042100	0
404	NOP56	Nucleolar protein 56	540	0.459133		TAGSTSIPKRKKSTPKEETVNDPEEAGHRSG	_STPK(gl)EETVNDPEEAGHRSGSK_	1	66.644	6.2e-05	0.12773	4916100	757970
405	NOP56;NOL5A;NOP56	Nucleolar protein 56	240	0.802689		EDKLEKLEELTMDGAKAKAILDASRSSMGMD	_LEELTM(ox)DGAK(gl)AK_	1	101.89	7.82e-05	0.48817	8981000	3668000
406	NOP58	Nucleolar protein 58	444	0.533384		DPSGDSTLPTCSKKRKIEQVDKEDEITEKKA	_RK(gl)IEQVDKEDEITEK_	1	174.74	2.07e-19	1.0885	11772000	2767500
407	NOP58	Nucleolar protein 58	497			TSVKKKKKRGKKKHIKEEPLSEEEPCTSTAI	_HIK(gl)EEPLSE_	1	51.268	0.0248997	1.3839	585050	0
408	NPM1	Nucleophosmin	267	0.308605		QASIEKGGSLPKVEAKFINYVKNCFRMTDQE	_VEAK(gl)FINYVK_	1	100.69	0.000349885	0.76692	30312000	4259000
409	NPM1	Nucleophosmin	248	0.270051		KTPKTPKGPSSVEDIKAKMQASIEKGGSLPK	_GPSSVEDIK(gl)AK_	1	159.75	1.01e-15	-0.012793	97461000	11955000
410	NPM1	Nucleophosmin	239	0.260071		GQESFKKQEKTPKTPKGPSSVEDIKAKMQAS	_TPK(gl)GPSSVEDIK_	1	90.89	3.59e-05	0.7869	10667000	878790
411	NPM1;NPM1	Nucleophosmin	134	0.324897		VEEDAESEDEEEEDVKLLSISGKRSAPGGGS	_VK(gl)LLSISGK_	1	132.06	0.000157369	-0.20454	137340000	23440000
412	NPM1;NPM1	Nucleophosmin	32	0.30643		YLFGCELKADKDYHFKVDNDENEHQLSLRTV	_DYHFK(gl)VDNDENE_	1	49.448	0.00762363	-0.040549	14926000	2139300
413	NPM1;NPM1	Nucleophosmin	141			EDEEEEDVKLLSISGKRSAPGGGSKVPQKKV	_LLSISGK(gl)RSAPGGGSK_	1	55.589	0.000568795	0.56337	784950	0
414	NPM1;NPM1	Nucleophosmin	54			EHQLSLRTVSLGAGAKDELHIVEAEAMNYEG	_HQLSLRTVSLGAGAK(gl)DE_	1	50.053	0.0123297	-0.62099	900270	0
415	NSF;NSF	Vesicle-fusing ATPase	489	0.326389		QVTRGDFLASLENDIKPAFGTNQEDYASYIM	_NDIK(gl)PAFGTNQE_	1	31.526	0.0401434	-0.025349	1772900	376260
416	NSMCE2;NSMCE2;NSMCE2;NSMCE2	E3 SUMO-protein ligase NSE2	107			ERPEKIPDLKLLVEKKFLALQSKNSDADFQN	_K(gl)FLALQSK_	1	83.182	0.00158547	0.69811	1648300	0
417	NSUN2;NSUN2	tRNA (cytosine(34)-C(5))-methyltransferase	660	0.322764		TYSQAKDLAKGSIVLKYEPDSANPDALQCPI	_GSIVLK(gl)YEPDSANPD_	1	38.376	0.0393	0.4236	3076100	495370
418	NSUN2;NSUN2	tRNA (cytosine(34)-C(5))-methyltransferase	654			RKLSSETYSQAKDLAKGSIVLKYEPDSANPD	_DLAK(gl)GSIVLK_	1	63.76	0.0150693	0.3418	1525900	0
419	NSUN2;NSUN2;NSUN2	tRNA (cytosine(34)-C(5))-methyltransferase	511			SKKDGVCGPPPSKKMKLFGFKEDPFVFIPED	_M(ox)K(gl)LFGFK_	1	56.432	0.0238912	0.045281	1506500	0
420	NUP50;NUP50;NUP50	Nuclear pore complex protein Nup50	353			EEENDEPPKVVVTEVKEEDAFYSKKCKLFYK	_VVVTEVK(gl)EEDAFYSK_	1	99.566	1.83e-05	0.22029	7645800	0
421	NXF1;NXF1	Nuclear RNA export factor 1	347	0.415525		RDQSTYISAIRERFPKLLRLDGHELPPPIAF	_RFPK(gl)LLRLD_	1	62.14	0.0330484	0.13264	748350	122380
422	NXF1;NXF1	Nuclear RNA export factor 1	304	0.173296		KAPNLKILNLSGNELKSERELDKIKGLKLEE	_ILNLSGNELK(gl)SERELDK_	1	179.46	3.56e-35	-0.077671	58409000	4969600
423	NXF1;NXF1	Nuclear RNA export factor 1	205			IINSSAPPHTILNELKPEQVEQLKLIMSKRY	_LK(gl)PEQVEQLK_	1	99.283	0.00120165	0.56489	1175000	0
424	NXF1;NXF1	Nuclear RNA export factor 1	22			SYSEHDDERVNFPQRKKKGRGPFRWKYGEGN	_SYSEHDDERVNFPQRK(gl)K_	1	92.492	7.3e-07	0.73129	2236400	0
425	NXF1;NXF1	Nuclear RNA export factor 1	294			RLDDMSSIVQKAPNLKILNLSGNELKSEREL	_APNLK(gl)ILNLSGNELK_	1	69.602	0.0105391	0.53267	3105600	0
426	NXF1;NXF1	Nuclear RNA export factor 1	289			NNRLYRLDDMSSIVQKAPNLKILNLSGNELK	_M(ox)SSIVQK(gl)APNLK_	1	58.172	0.00789134	-0.85504	957500	0
427		Putative RNA polymerase II subunit A C-terminal domain phosphatase SSU72-like protein 3;Putative RNA polymerase II subunit A C-terminal domain phosphatase SSU72-like protein 1;Putative RNA polymerase II subunit A C-terminal domain phosphatase SSU72-like protein 2	92	0.242862		THNGILHILGRNERIKPGPERFQECTEFFDV	_RIK(gl)PGPERFQE_	1	96.756	0.000421606	-0.54797	626090	89306
428	PA2G4	Proliferation-associated protein 2G4	355			PDLYKSEMEVQDAELKALLQSSASRKTQKKK	_SEM(ox)EVQDAELK(gl)ALLQSSASRK_	1	47.75	0.00108965	0.021009	1955700	0
429	PA2G4;PA2G4;PA2G4;PA2G4	Proliferation-associated protein 2G4	248	0.578805		GEGKAKDAGQRTTIYKRDPSKQYGLKMKTSR	_DAGQRTTIYK(gl)RDPSK_	1	58.83	0.00171656	0.27582	1526000	363200
430	PAICS;PAICS;PAICS	Multifunctional protein ADE2;Phosphoribosylaminoimidazole-succinocarboxamide synthase;Phosphoribosylaminoimidazole carboxylase	242	0.583432		GDRSQQKDKQSYRDLKEVTPEGLQMVKKNFE	_(gl)QSYRDLK(gl)E_	1	68.536	0.0396	0.35193	803370	159060
431	PARP1	Poly [ADP-ribose] polymerase 1	467	0.460263		RVVSEDFLQDVSASTKSLQELFLAHILSPWG	_VSASTK(gl)SLQE_	1	134.2	2.87e-05	0.35737	254640000	62385000
432	PARP1	Poly [ADP-ribose] polymerase 1	761	0.448087		MKKPPLLNNADSVQAKVEMLDNLLDIEVAYS	_KPPLLNNADSVQAK(gl)VE_	0.999991	79.652	9.02e-06	-0.27482	3519600	553860
433	PARP1	Poly [ADP-ribose] polymerase 1	486	0.312806		ELFLAHILSPWGAEVKAEPVEVVAPRGKSGA	_VK(gl)AEPVEVVAPRGK_	1	104.95	1.05e-06	-0.45748	90635000	15927000
434	PARP1	Poly [ADP-ribose] polymerase 1	548			VDPDSGLEHSAHVLEKGGKVFSATLGLVDIV	_GGAAVDPDSGLEHSAHVLEK(gl)GGK_	1	119.79	2.59e-18	-0.020914	3624500	0
435	PARP1	Poly [ADP-ribose] polymerase 1	203			ATEDKEALKKQLPGVKSEGKRKGDEVDGVDE	_QLPGVK(gl)SEGK_	1	57.328	0.020784	0.28755	1224000	0
436	PBRM1;PBRM1	Protein polybromo-1	1293	0.62382		SLSAKVVDDEIYYFRKPIVPQKEPSPLLEKK	_VVDDEIYYFRK(gl)PIVPQK_	1	76.151	0.000135893	-0.20054	166720000	55165000
437	PCBP4;PCBP3;PCBP2;PCBP3;PCBP1;PCBP4;PCBP2;PCBP2;PCBP2;PCBP2;PCBP2;PCBP2;PCBP2;PCBP4;PCBP2;PCBP4;PCBP4;PCBP4;PCBP4;PCBP4;PCBP2;PCBP4;PCBP4;PCBP2	Poly(rC)-binding protein 4;Poly(rC)-binding protein 3;Poly(rC)-binding protein 2;Poly(rC)-binding protein 1	35	1.33639		LRMLMHGKEVGSIIGKKGETVKRIREQSSAR	_EVGSIIGK(gl)K_	1	65.563	0.00318561	1.5224	2089900	1469000
438	PCF11	Pre-mRNA cleavage complex 2 protein Pcf11	1546	0.702251		PPACTEESIATPSEIKTENDTVESV______	_SIATPSEIK(gl)TE_	1	72.652	0.000430066	0.12904	2746900	1029900
439	PCNA	Proliferating cell nuclear antigen	164	0.59902		RDLSHIGDAVVISCAKDGVKFSASGELGNGN	_LSHIGDAVVISCAK(gl)DGVK_	1	100.04	7.1e-10	-0.57395	2765900	677320
440	PCYT1A;PCYT1A;PCYT1A;PCYT1A	Choline-phosphate cytidylyltransferase A	266	0.39612		KKVKDVEEKSKEFVQKVEEKSIDLIQKWEEK	_EFVQK(gl)VEEK_	1	36.424	0.0268405	0.19127	16098000	3568300
441	PDIA3;PDIA3	Protein disulfide-isomerase A3	366			RFLQDYFDGNLKRYLKSEPIPESNDGPVKVV	_RYLK(gl)SEPIPESNDGPVK_	1	80.545	5.21e-06	-0.29448	2755000	0
442	PEA15;PEA15;PEA15	Astrocytic phosphoprotein PEA-15	143			KYKDIIRQPSEEEIIKLAPPPKKA_______	_IIK(gl)LAPPPK_	1	44.203	0.0274535	0.32453	265190	0
443	PEG10	Retrotransposon-derived protein PEG10	22			DELSEEINNLREKVMKQSEENNNLQSQVQKL	_VM(ox)K(gl)QSEENNNLQSQVQK_	1	67.605	0.000331189	1.4963	1038300	0
444	PES1;PES1;PES1	Pescadillo homolog	517	0.324726		QRMEGKKPRVMAGTLKLEDKQRLAQEEESEA	_KPRVM(ox)AGTLK(gl)LEDK_	0.999991	93.495	6.65e-05	0.21945	29081000	4395000
445	PGAM1;PGAM4;PGAM2	Phosphoglycerate mutase 1;Probable phosphoglycerate mutase 4;Phosphoglycerate mutase 2	100	0.429684		WRLNERHYGGLTGLNKAETAAKHGEAQVKIW	_RHYGGLTGLNK(gl)AE_	1	97.551	3.33e-05	0.54648	8070600	1789800
446	PHAX	Phosphorylated adapter RNA export protein	339			KRRTQVLGKKMKQAIKSLNFQEDDDTSRETF	_(gl)QAIK(gl)SLNFQEDDDTSRE_	1	55.864	0.000180273	-0.45948	417110	0
447	PHF12;PHF12;PHF12	PHD finger protein 12	467			MPSHWDSEQTEKADIKPVIVTDSSVTTSLQT	_ADIK(gl)PVIVTDSSVTTSLQTADK_	1	96.903	3.47e-11	2.038	3580200	0
448	PHF14	PHD finger protein 14	98			NSAEEEVLSSEKQLIKMEKKEEEENGERPRK	_(gl)QLIK(gl)M(ox)EK_	1	123.86	1.23e-10	-0.028901	8179000	0
449	PHF21A;PHF21A;PHF21A;PHF21A	PHD finger protein 21A	65			KQKRVVEQLRKNLIVKQEQPDKFQIQPLPQS	_NLIVK(gl)QEQPDK_	1	94.767	0.000650129	0.21908	1024600	0
450	PHF6;PHF6;PHF6	PHD finger protein 6	350	0.652544		ERDEEDEERESKSRGKVEIDQQQLTQQQLNG	_SRGK(gl)VEIDQQQLTQQQLN(de)GN_	1	85.146	1.47e-07	0.17999	1319800	179790
451	PHGDH;PHGDH	D-3-phosphoglycerate dehydrogenase	394			LKEASKQADVNLVNAKLLVKEAGLNVTTSHS	_(gl)QADVNLVNAK(gl)LLVK_	1	100.54	3.32e-05	-0.09298	1593300	0
452	PHTF1;PHTF1;PHTF1;PHTF1	Putative homeodomain transcription factor 1	506	88.8306		PFLHRLFREKSLDQLKSISAEEILTLFCGAP	_QLK(gl)SISAE_	1	37.727	0.0383356	-0.85959	750660	24149000
453	PIAS1;PIAS1;PIAS1	E3 SUMO-protein ligase PIAS1	119	1.5297		HPASSPLLPVSLLGPKHELELPHLTSALHPV	_GHPASSPLLPVSLLGPK(gl)HE_	1	73.11	7.6e-07	-0.078149	1626600	1540300
454	PIAS2		562	0.998915		DLPGEQRRNDINNELKLGTSSDTVQQ_____	_LK(gl)LGTSSDTVQQ_	1	87.001	0.000255809	-0.23551	1033600	545980
455	PIAS2;PIAS2;PIAS2	E3 SUMO-protein ligase PIAS2	443	3.69742		RPKKEAMKVSSQPCTKIESSSVLSKPCSVTV	_VSSQPCTK(gl)IE_	1	74.944	9.04e-11	0.37512	1692600	2554100
456	PML;PML;PML	Protein PML	160	2.12912		QLLCAKCFEAHQWFLKHEARPLAELRNQSVR	_AHQWFLK(gl)HE_	1	88.187	0.00297	-0.024816	5329600	5925500
457	PML;PML;PML	Protein PML	426	1.57117		RDPIDVDLPEEAERVKAQVQALGLAEAQPMA	_RVK(gl)AQVQALGLAE_	1	72.898	5.08e-05	0.060472	2329200	2155900
458	PMP2	Myelin P2 protein	45			TRKLGNLAKPTVIISKKGDIITIRTESTFKN	_PTVIISK(gl)K_	1	37.727	0.02761	1.0294	629510	0
459	PNN	Pinin	365	1.21685		EKEQEEEEQKQEMEVKMEEETEVRESEKQQD	_QEM(ox)EVK(gl)M(ox)EEETEVRESEK_	1	85.636	3.35e-06	0.17872	3237100	2293200
460	POLD1	DNA polymerase delta catalytic subunit	574	1.048		LLRQAMHEGLLMPVVKSEGGEDYTGATVIEP	_GLLM(ox)PVVK(gl)SE_	1	59.426	0.00332832	-0.2588	18396000	5821900
461	POLD3;POLD3;POLD3	DNA polymerase delta subunit 3	258			AMNKFKVNLDSEQAVKEEKIVEQPTVSVTEP	_VNLDSEQAVK(gl)EEK_	1	174.37	5.65e-33	0.86813	17733000	0
462	POLR3D	DNA-directed RNA polymerase III subunit RPC4	262	4.79924		KDVSVAELLRELSLTKEEELLFLQLPDTLPG	_LSLTK(gl)EEE_	1	65.224	0.0388	-0.71331	821420	2106100
463	POLR3D	DNA-directed RNA polymerase III subunit RPC4	302	1.20768		IKTEVQGEDGQVVLIKQEKDREAKLAENACT	_VQGEDGQVVLIK(gl)QEK_	1	147.26	8.15e-13	-0.10194	60113000	24205000
464	POLR3D;POLR3D	DNA-directed RNA polymerase III subunit RPC4	141	0.981578		TVDVSDMGPSHIINIKKEKRETDEETKQILR	_TVDVSDM(ox)GPSHIINIK(gl)K_	1	98.269	2.28e-06	0.88894	28766000	14496000
465	POLR3E;POLR3E	DNA-directed RNA polymerase III subunit RPC5	171	2.18339		NEAGDSSQDEAEDDVKQITVRFSRPESEQAR	_VK(gl)QITVRFSRPE_	1	62.378	0.00107	-0.61061	413350	581360
466	PPIL1	Peptidyl-prolyl cis-trans isomerase-like 1	161			ETNSQDRPVDDVKIIKAYPSG__________	_IIK(gl)AYPSG_	1	50.04	0.026884	0.64445	3505300	0
467	PPIL4	Peptidyl-prolyl cis-trans isomerase-like 4	405	1.30157		HHCSEEKEDEDYMPIKNTNQDIYREMGFGHY	_DYM(ox)PIK(gl)NTNQDIYRE_	1	110.77	6.77e-09	0.41283	1069000	538330
468	PPIL4	Peptidyl-prolyl cis-trans isomerase-like 4	218	0.534088		RSAEEVEEIKAEKEAKTQAILLEMVGDLPDA	_EAK(gl)TQAILLE_	1	62.303	0.00496492	0.76305	2370300	457860
469	PPIL4	Peptidyl-prolyl cis-trans isomerase-like 4	352	0.353194		KEYEKEQDKPPNLVLKDKVKPKQDTKYDLIL	_EQDKPPNLVLK(gl)DK_	0.99834	41.378	0.0341059	0.96625	2420700	280070
470	PPIL4	Peptidyl-prolyl cis-trans isomerase-like 4	362	0.341423		PNLVLKDKVKPKQDTKYDLILDEQAEDSKSS	_(gl)QDTK(gl)YDLILDE_	1	72.496	0.00474589	0.029266	854430	178910
471	PPM1G	Protein phosphatase 1G	320	0.408722		DEEEEEEMMVPGMEGKEEPGSDSGTTAVVAL	_GK(gl)EEPGSDSGTTAVVALIRGK_	1	64.723	2.89e-05	0.65168	1374800	153520
472	PPP1R8	Nuclear inhibitor of protein phosphatase 1;Activator of RNA decay	151	0.410279		AVKGDEKMGGEDDELKGLLGLPEEETELDNL	_LK(gl)GLLGLPEEE_	1	46.706	0.0153746	-0.38866	393250	64853
473	PPP2R5D;PPP2R5D	Serine/threonine-protein phosphatase 2A 56 kDa regulatory subunit delta isoform	82	0.354026		TQLSKIKYSGGPQIVKKERRQSSSRFNLSKN	_YSGGPQIVK(gl)K_	1	130.69	2.27e-07	0.44268	5173100	1231500
474	PRDM1	PR domain zinc finger protein 1	765	1.11682		SVISVVEKEILAVVRKEKEETGLKVSLQRNM	_ILAVVRK(gl)E_	1	92.866	0.00416499	-0.20078	11867000	7491900
475	PRKCSH	Glucosidase 2 subunit beta	180	0.45619		GKKSLEDQVEMLRTVKEEAEKPEREAKEQHQ	_SLEDQVEM(ox)LRTVK(gl)EEAEKPEREAK_	0.999623	102.21	5.86e-13	0.7638	5779900	718470
476	PRKCSH	Glucosidase 2 subunit beta	471	0.395437		WGSWIGPDHDKFSAMKYEQGTGCWQGPNRST	_FSAM(ox)K(gl)YE_	1	87.149	0.0381559	-0.0073739	3754300	706490
477	PROX1	Prospero homeobox protein 1	556	1.20303		AHPPSTAEGLSLSLIKSECGDLQDMSEISPY	_GLSLSLIK(gl)SE_	1	77.662	0.00173823	-0.23273	10878000	6961900
478	PROX1;PROX1	Prospero homeobox protein 1	75	1.69289		QHADGEKSNVLRKLLKRANSYEDAMMPFPGA	_LLK(gl)RANS(ph)YE_	1	95.401	0.00192541	0.45324	645380	540760
479	PRPF3;PRPF3	U4/U6 small nuclear ribonucleoprotein Prp3	647	0.838087		LVWEGTAKDRSFGEMKFKQCPTENMAREHFK	_DRSFGEM(ox)K(gl)FK_	1	46.282	0.027937	0.0046372	2786300	919900
480	PRPF3;PRPF3;PRPF3	U4/U6 small nuclear ribonucleoprotein Prp3	376	4.33992		KTGIHTSTRLALIAPKKELKEGDIPEIEWWD	_TGIHTSTRLALIAPK(gl)K_	1	72.086	0.000504309	-0.54977	3920300	9405200
481	PRPF3;PRPF3;PRPF3	U4/U6 small nuclear ribonucleoprotein Prp3	289	2.5523		LTHRMPTLKANIRAVKREQFKQQLKEKPSED	_ANIRAVK(gl)REQFK_	1	60.324	0.00183	0.55038	6818800	11331000
482	PRPF40A	Pre-mRNA-processing factor 40 homolog A	517	47.5062		RDRLEIYEDVLFFLSKKEKEQAKQLRKRNWE	_DVLFFLSK(gl)K_	1	83	0.00493074	-0.35941	662900	13141000
483	PRPF40A	Pre-mRNA-processing factor 40 homolog A	707	7.78955		VNTTFEDFVAIISSTKRSTTLDAGNIKLAFN	_DFVAIISSTK(gl)RSTTLD_	1	50.608	0.00106	-0.039558	402520	1553400
484	PRPF40A;PRPF40A	Pre-mRNA-processing factor 40 homolog A	241	145.803		VAGSLITKSNLHAMIKAEESSKQEECTTTST	_SNLHAM(ox)IK(gl)AEESSK_	1	195.02	1.28e-23	-0.55178	24368000	1566600000
485	PRPF40A;PRPF40A	Pre-mRNA-processing factor 40 homolog A	375	45.4548		GEETSKQETVADFTPKKEEEESQPAKKTYTW	_TVADFTPK(gl)K_	1	184.17	8.84e-23	0.25934	13762000	308330000
486	PRPF4B;PRPF4B	Serine/threonine-protein kinase PRP4 homolog	117	1.59712		DLALLEDLEKQRALIKAELDNELMEGKVQSG	_(gl)QRALIK(gl)AELDNELM(ox)EGK_	1	115.34	2.09e-10	-0.49076	24537000	19368000
487	PRPF4B;PRPF4B;PRPF4B	Serine/threonine-protein kinase PRP4 homolog	892	3.13062		CTLYELYTGKILFPGKTNNHMLKLAMDLKGK	_ILFPGK(gl)T(ph)NNHMLK_	1	46.68	0.0113653	-0.043461	113840000	177180000
488	PSMA5	Proteasome subunit alpha type-5	231	0.440346		ELATVQPGQNFHMFTKEELEEVIKDI_____	_LATVQPGQNFHM(ox)FTK(gl)EE_	1	42.813	0.00561759	0.42109	2086300	317580
489	PSMC3;PSMC3;PSMC3;PSMC3	26S protease regulatory subunit 6A	209			QIQELVEAIVLPMNHKEKFENLGIQPPKGVL	_(gl)QIQELVEAIVLPM(ox)NHK(gl)EK_	1	51.348	0.000545749	-0.98914	1390900	0
490	PSMD12	26S proteasome non-ATPase regulatory subunit 12	15	0.505172		_MADGGSERADGRIVKMEVDYSATVDQRLPE	_(ac)ADGGSERADGRIVK(gl)M(ox)E_	1	65.467	0.0019287	0.24236	6197200	1535000
491	PSMD12	26S proteasome non-ATPase regulatory subunit 12	92	0.487132		AKEWDLLNENIMLLSKRRSQLKQAVAKMVQQ	_NIM(ox)LLSK(gl)RRSQLK_	1	43.594	0.00866128	0.53615	10571000	2658900
492	PTBP1	Polypyrimidine tract-binding protein 1	13	0.701867		___MDGIVPDIAVGTKRGSDELFSTCVTNGP	_(ac)M(ox)DGIVPDIAVGTK(gl)RGSDE_	1	55.33	0.00023527	0.084676	950010	237390
493	PTBP1;PTBP3	Polypyrimidine tract-binding protein 1;Polypyrimidine tract-binding protein 3	266	0.720526		CTLRIDFSKLTSLNVKYNNDKSRDYTRPDLP	_LTSLNVK(gl)YNNDK_	1	110.77	3.43e-07	1.6607	2771600	1027300
494	PTBP1;PTBP3	Polypyrimidine tract-binding protein 1;Polypyrimidine tract-binding protein 3	259			QNIYNACCTLRIDFSKLTSLNVKYNNDKSRD	_FSK(gl)LTSLNVK_	1	94.616	0.00438232	-0.49796	5124000	0
495	PTMA;PTMA	Prothymosin alpha;Thymosin alpha-1	15			_MSDAAVDTSSEITTKDLKEKKEVVEEAENG	_(ac)SDAAVDTSSEITTK(gl)DLK_	1	72.184	0.000125967	0.054785	715460	0
496	PUF60		14			__MATATIALGTDSIKMENGQSTAAKLGLPP	_(ac)ATATIALGTDSIK(gl)M(ox)E_	1	58.831	0.00644546	-0.031339	328490	0
497	QRICH1	Glutamine-rich protein 1	353	0.401174		NAVHVSGSPTALAAVKLEDDKEKMVGTTSVV	_AYNAVHVSGS(ph)PTALAAVK(gl)LE_	1	130	6.79e-15	0.18055	11838000	2063400
498	RALY;RALY;RALY;RALY	RNA-binding protein Raly	165	0.441199		VTVPLVRRVKTNVPVKLFARSTAVTTSSAKI	_TNVPVK(gl)LFARSTAVTTSSAK_	1	89.859	4.68e-08	-0.070815	1273400	409230
499	RALY;RALY;RALY;RALY;RALY	RNA-binding protein Raly	4	0.3607		____________MSLKLQASNVTNKNDPKSI	_(ac)SLK(gl)LQASNVTNK_	1	154.36	7.43e-12	0.32628	32507000	5878500
500	RALY;RALY;RALY;RALY;RALY	RNA-binding protein Raly	13			___MSLKLQASNVTNKNDPKSINSRVFIGNL	_LQASNVTNK(gl)NDPK_	1	59.898	0.00734858	0.29062	2289400	0
501	RAN;RAN;RAN;RAN	GTP-binding nuclear protein Ran	170	0.979829		VFHRKKNLQYYDISAKSNYNFEKPFLWLARK	_NLQYYDISAK(gl)SNYNFEK_	1	63.918	0.000594949	0.12026	4094200	663140
502	RANBP1;RANBP1;RANBP1;PKIB;PKIB;PKIB	Ran-specific GTPase-activating protein;cAMP-dependent protein kinase inhibitor beta	190	0.385287		DHAEKVAEKLEALSVKEETKEDAEEKQ____	_LEALSVK(gl)EETK_	1	172.92	4.56e-16	-0.19404	431260000	92215000
503	RANBP1;RANBP1;RANBP1;RANBP1;RANBP1;RANBP1	Ran-specific GTPase-activating protein	76			ENDLPEWKERGTGDVKLLKHKEKGAIRLLMR	_ERGTGDVK(gl)LLK_	1	41.092	0.0376197	-0.70819	4395700	0
504	RANBP2	E3 SUMO-protein ligase RanBP2;Putative peptidyl-prolyl cis-trans isomerase	1414	0.837277		TSPENVQDRFALVTPKKEGHWDCSICLVRNE	_TSPENVQDRFALVTPK(gl)K_	1	56.407	0.00192222	-0.1261	2462000	1072400
505	RANGAP1;RANGAP1	Ran GTPase-activating protein 1	524	1.1414		SNTFLTRLLVHMGLLKSEDKVKAIANLYGPL	_AFNSSSFNSNTFLTRLLVHM(ox)GLLK(gl)SEDK_	1	88.517	2.74e-09	-0.0057456	13374000	8179600
506	RAX	Retinal homeobox protein Rx	125			RPSPGLPVGPATGEAKLSEEEQPKKKHRRNR	_AK(gl)LSEEEQPK_	1	33.875	0.0280209	-0.948	0	0
507	RBBP5	Retinoblastoma-binding protein 5	397			PIAAFCSSDEELEDSKALLYLPIAPEVEDPE	_DSK(gl)ALLYLPIAPE_	1	99.011	0.00024963	0.17374	2757900	0
508	RBBP6;RBBP6;RBBP6	E3 ubiquitin-protein ligase RBBP6	232			KYAIPTIDAEAYAIGKKEKPPFLPEEPSSSS	_YAIPTIDAEAYAIGK(gl)K_	1	128.9	8.04e-13	0.25482	7544900	0
509	RBBP8;RBBP8	DNA endonuclease RBBP8	578			PLNKCSPDNKPSLQIKEENAVFKIPLRPRES	_PSLQIK(gl)EENAVFK_	1	39.947	0.0294734	1.136	0	0
510	RBM10	RNA-binding protein 10	536			AANSQSYTIMSPAVLKSELQSPTHPSSALPP	_ASSSQGTAANSQSYTIM(ox)SPAVLK(gl)SE_	1	34.715	0.0105537	0.54401	2279700	0
511	RBM14	RNA-binding protein 14	126	2.09522		VKDYAFVHMEKEADAKAAIAQLNGKEVKGKR	_EADAK(gl)AAIAQLNGK_	1	74.537	0.000778555	-0.53573	8314200	3537500
512	RBM14	RNA-binding protein 14	135	0.905663		EKEADAKAAIAQLNGKEVKGKRINVELSTKG	_AAIAQLNGK(gl)EVK_	1	105.17	2.53e-06	-0.12339	4216000	1598400
513	RBM14	RNA-binding protein 14	140	0.827361		AKAAIAQLNGKEVKGKRINVELSTKGQKKGP	_GK(gl)RINVELSTK_	1	192.32	5.75e-23	-0.33037	15206000	7369400
514	RBM14	RNA-binding protein 14	149	0.745774		GKEVKGKRINVELSTKGQKKGPGLAVQSGDK	_RINVELSTK(gl)GQK_	1	150.51	1.87e-11	-0.023907	65187000	25407000
515	RBM14	RNA-binding protein 14	630	0.700161		RRLSESQLSFRRSPTKSSLDYRRLPDAHSDY	_SQLSFRRS(ph)PTK(gl)SSLD_	1	36.856	0.0108975	0.20898	2179600	868860
516	RBM19	Probable RNA-binding protein 19	481	0.431518		QVFQGRMLHVLPSTIKKEASEDASALGSSSY	_AYSEVDGQVFQGRM(ox)LHVLPSTIK(gl)K_	1	51.39	0.000177442	0.49111	8407600	1041700
517	RBM27	RNA-binding protein 27	85			ESLYTKNYLPLLEPVKPEPKPLVQEKEEIKE	_NYLPLLEPVK(gl)PEPK_	1	84.566	0.000384547	1.2413	1207300	0
518	RBM39;RBM39;RBM39;RBM39;RBM39;RBM39;RBM39	RNA-binding protein 39	178			RIRPRDLEEFFSTVGKVRDVRMISDRNSRRS	_FFSTVGK(gl)VRD_	1	48.112	0.0016469	0.088875	0	0
519	RBM4;RBM4B;RBM4;RBM4;RBM4B;RBM4B	RNA-binding protein 4;RNA-binding protein 4B	3	2.68707		_____________MVKLFIGNLPREATEQEI	_VK(gl)LFIGNLPREATEQE_	1	39.685	0.0259	-0.34362	734970	1143800
520	RCN1;RCN1;RCN1	Reticulocalbin-1	81	0.494041		KEDSKTFDQLTPDESKERLGKIVDRIDNDGD	_TFDQLTPDESK(gl)ERLGK_	1	115.91	5.1e-09	0.87023	6924200	1215300
521	RCN1;RCN1;RCN1	Reticulocalbin-1	70			SFQYDHEAFLGKEDSKTFDQLTPDESKERLG	_EDSK(gl)TFDQLTPDESK_	1	91.969	3.61e-05	0.92097	2775700	0
522	RCOR1	REST corepressor 1	297	0.801047		ESKKEVPPTETVPQVKKEKHSTQAKNRAKRK	_EVPPTETVPQVK(gl)K_	1	78.529	0.000202566	0.32112	3476800	1267100
523	RDBP;RDBP;RDBP;RDBP;RDBP;RDBP;RDBP;RDBP	Negative elongation factor E	85			EQAKQLVKSGAISAIKAETKNSGFKRSRTLE	_SGAISAIK(gl)AETK_	1	79.471	0.00208215	-0.29088	6718200	0
524	REXO4	RNA exonuclease 4	115			PKIIQQNKKETSPQVKGEEMPAGKDQEASRG	_ETSPQVK(gl)GEEM(ox)PAGK_	1	47.545	0.0120666	0.21259	2262900	0
525	RIC8A;RIC8A;RIC8A	Synembryn-A	456			YSEDEDTDTDEYKEAKASINPVTGRVEEKPP	_EAK(gl)ASINPVTGRVEE_	1	63.894	0.00208995	-0.063695	840940	0
526	RLF	Zinc finger protein Rlf	839	0.905344		MHNVENSNGDIKKSVKLEESATGEKQDCINQ	_SVK(gl)LEESATGEK_	1	127.71	2.52e-09	1.1945	8972700	2922500
527	RNF113A	RING finger protein 113A	316			QQTNGVFNPAKELIAKLEKHRATGEGGASDL	_ELIAK(gl)LEK_	1	54.066	5.93e-06	-0.15425	0	0
528	RNF40;RNF40;RNF40	E3 ubiquitin-protein ligase BRE1B	578			EMAPVPGTTTTTTSVKKEELVPSEEDFQGIT	_M(ox)APVPGTTTTTTSVK(gl)K_	1	147.64	5.4e-19	1.3686	10071000	0
529	RNGTT;RNGTT;RNGTT	mRNA-capping enzyme;Polynucleotide 5'-triphosphatase;mRNA guanylyltransferase	287			QPVSMDKQNIKLLDLKPYKVSWKADGTRYMM	_LLDLK(gl)PYK_	1	83	0.0018597	0.55497	1073100	0
530	RNPEP;RNPEP;RNPEP	Aminopeptidase B	398	0.461969		MDITGEENPLNKLRVKIEPGVDPDDTYNETP	_LRVK(gl)IEPGVDPDDTYNETPYEK_	1	82.635	8.63e-08	-0.15973	4074700	703880
531	RPL10;RPL10L;RPL10;RPL10;RPL10	60S ribosomal protein L10;60S ribosomal protein L10-like	158	2.21197		QNKEHVIEALRRAKFKFPGRQKIHISKKWGF	_FK(gl)FPGRQK_	1	58.592	0.00503	1.2182	5346700	5470700
532	RPL10A	60S ribosomal protein L10a	130	0.91639		SLIKQIPRILGPGLNKAGKFPSLLTHNENMV	_(gl)QIPRILGPGLNK(gl)AGK_	1	62.357	0.000175	1.0477	1628400	175530
533	RPL10A	60S ribosomal protein L10a	4	0.459176		____________MSSKVSRDTLYEAVREVLH	_(ac)SSK(gl)VSRDTLYE_	1	87.001	0.000241778	0.19507	4871700	1066400
534	RPL10A	60S ribosomal protein L10a	78	0.440879		FSVCVLGDQQHCDEAKAVDIPHMDIEALKKL	_AK(gl)AVDIPHM(ox)D_	1	33.87	0.0353841	0.16793	1262600	290510
535	RPL10A	60S ribosomal protein L10a	133			KQIPRILGPGLNKAGKFPSLLTHNENMVAKV	_AGK(gl)FPSLLTHNE_	1	61.641	0.0122735	-0.79159	1135700	0
536	RPL11;RPL11;RPL11	60S ribosomal protein L11	88	0.407848		TVRGAKAEEILEKGLKVREYELRKNNFSDTG	_GLK(gl)VREYELRK_	1	99.941	7.98e-05	-0.15283	10167000	2298900
537	RPL11;RPL11;RPL11	60S ribosomal protein L11	85			VHCTVRGAKAEEILEKGLKVREYELRKNNFS	_AEEILEK(gl)GLK_	1	71.241	0.00886711	0.3775	724370	0
538	RPL12	60S ribosomal protein L12	99	0.502912		ALKEPPRDRKKQKNIKHSGNITFDEIVNIAR	_NIK(gl)HSGNITFDE_	1	43.184	0.0150505	-0.001684	1039000	277830
539	RPL12	60S ribosomal protein L12	83	0.431028		QAQIEVVPSASALIIKALKEPPRDRKKQKNI	_VVPSASALIIK(gl)ALK_	1	32.275	0.023938	0.10289	1024100	203820
540	RPL12	60S ribosomal protein L12	40			TSALAPKIGPLGLSPKKVGDDIAKATGDWKG	_IGPLGLSPK(gl)K_	1	91.307	0.000737499	0.73733	2037200	0
541	RPL13	60S ribosomal protein L13	145	0.469518		KPSAPKKGDSSAEELKLATQLTGPVMPVRNV	_LK(gl)LATQLTGPVMPVRNVYK_	1	100.77	9.57e-11	-0.15263	9446300	1361000
542	RPL13	60S ribosomal protein L13	162	0.382643		ATQLTGPVMPVRNVYKKEKARVITEEEKNFK	_LATQLTGPVMPVRNVYK(gl)K_	1	127.2	1.32e-09	0.78019	65583000	12205000
543	RPL13A	60S ribosomal protein L13a	201	2.52586		EKNVEKKIDKYTEVLKTHGLLV_________	_YTEVLK(gl)THGLLV_	1	45.911	0.0129758	-0.60676	3863100	4580600
544	RPL14	60S ribosomal protein L14	137	0.428319		IIKNEVKKLQKAALLKASPKKAPGTKGTAAA	_AALLK(gl)AS(ph)PK_	1	112.15	0.000713387	-0.19751	2045700	389700
545	RPL14	60S ribosomal protein L14	124			RFKVMKAKKMRNRIIKNEVKKLQKAALLKAS	_M(ox)RNRIIK(gl)NEVK_	1	66.267	0.00095207	2.0533	0	0
546	RPL15;RPL15;RPL15;RPL15	60S ribosomal protein L15;Ribosomal protein L15;Ribosomal protein L15;Ribosomal protein L15	83	1.67144		RGGRKRPVPKGATYGKPVHHGVNQLKFARSL	_GATYGK(gl)PVHHGVNQLK_	1	44.294	0.0121805	1.7326	3820200	2320800
547	RPL15;RPL15;RPL15;RPL15;RPL15	60S ribosomal protein L15;Ribosomal protein L15;Ribosomal protein L15;Ribosomal protein L15;Ribosomal protein L15	5	1.8047		___________MGAYKYIQELWRKKQSDVMR	_GAYK(gl)YIQE_	1	62.107	0.0132757	0.33085	1266000	978500
548	RPL17	60S ribosomal protein L17	37	0.535367		LRVHFKNTRETAQAIKGMHIRKATKYLKDVT	_NTRETAQAIK(gl)GM(ox)HIRK_	1	66.335	0.000561216	-1.4595	3940700	788710
549	RPL17	60S ribosomal protein L17	105			FLLHMLKNAESNAELKGLDVDSLVIEHIQVN	_LK(gl)GLDVDSLVIE_	1	84.289	0.00406907	-0.12705	1005600	0
550	RPL18;RPL18;RPL18;RPL18;RPL18;RPL18	60S ribosomal protein L18;60S ribosomal protein L18;60S ribosomal protein L18;60S ribosomal protein L18;60S ribosomal protein L18	80			LSRMIRKMKLPGRENKTAVVVGTITDDVRVQ	_NK(gl)TAVVVGTITDDVRVQE_	1	44.382	0.00701857	0.16683	455030	0
551	RPL18A	60S ribosomal protein L18a	149	3.47245		ASKCRRPAVKQFHDSKIKFPLPHRVLRRQHK	_(gl)QFHDSK(gl)IK_	1	39.918	0.0131083	0.028818	13358000	21786000
552	RPL18A;RPL18A	60S ribosomal protein L18a;60S ribosomal protein L18a	170	2.05999		PHRVLRRQHKPRFTTKRPNTFF_________	_PRFTTK(gl)RPNTFF_	1	35.594	0.026124	0.076775	1005400	1149300
553	RPL21	60S ribosomal protein L21	107	0.755306		RIEHIKHSKSRDSFLKRVKENDQKKKEAKEK	_SRDSFLK(gl)RVK_	1	60.196	0.0180241	-0.09121	1223000	348990
554	RPL21;RPL21	60S ribosomal protein L21	43	0.515109		ATYMRIYKKGDIVDIKGMGTVQKGMPHKCYH	_KGDIVDIK(gl)GM(ox)GTVQK_	0.999968	107.34	2.27e-07	-1.0022	10702000	2871500
555	RPL23	60S ribosomal protein L23	113			FEDNAGVIVNNKGEMKGSAITGPVAKECADL	_GEM(ox)K(gl)GSAITGPVAK_	1	72.321	0.00114317	0.27751	4196400	0
556	RPL23	60S ribosomal protein L23	123			NKGEMKGSAITGPVAKECADLWPRIASNAGS	_GSAITGPVAK(gl)E_	1	53.967	0.0232854	0.13649	2098600	0
557	RPL24	60S ribosomal protein L24	147	0.702934		APTKAAPKQKIVKPVKVSAPRVGGKR_____	_IVKPVK(gl)VSAPRVGGKR_	0.971733	94.384	5.23e-07	0.54086	757060	151810
558	RPL26;RPL26L1;RPL26L1	60S ribosomal protein L26;60S ribosomal protein L26-like 1	110	0.400726		VHVGIHPSKVVITRLKLDKDRKKILERKAKS	_VVITRLK(gl)LDK_	1	101.3	0.000117838	0.31062	49132000	10362000
559	RPL26;RPL26L1;RPL26L1;RPL26L1	60S ribosomal protein L26;60S ribosomal protein L26-like 1	2	0.293977		______________MKFNPFVTSDRSKNRKR	_M(ox)K(gl)FNPFVTSDRSK_	1	142.1	2.25e-16	-0.056342	40215000	6929000
560	RPL27	60S ribosomal protein L27	125	3.55263		RDPALKRKARREAKVKFEERYKTGKNKWFFQ	_VK(gl)FEERYK_	1	70.942	0.00284016	0.8124	2698800	4145800
561	RPL3;RPL3	60S ribosomal protein L3	366	0.498029		LLVQTKRRALEKIDLKFIDTTSKFGHGRFQT	_IDLK(gl)FIDTTSK_	1	94.191	0.000150901	0.22325	15614000	1880800
562	RPL3;RPL3	60S ribosomal protein L3	386	0.384114		TSKFGHGRFQTMEEKKAFMGPLKKDRIAKEE	_K(gl)AFM(ox)GPLK_	1	110.38	4.98e-14	-0.066617	14464000	1380400
563	RPL3;RPL3;RPL3	60S ribosomal protein L3	294	0.571533		EINKKIYKIGQGYLIKDGKLIKNNASTDYDL	_IGQGYLIK(gl)DGK_	1	69.594	0.00195392	-0.077878	2265400	623730
564	RPL3;RPL3;RPL3	60S ribosomal protein L3	300			YKIGQGYLIKDGKLIKNNASTDYDLSDKSIN	_LIK(gl)NNASTDYDLSDK_	1	147.1	2.2e-17	0.07237	12308000	0
565	RPL3;RPL3;RPL3	60S ribosomal protein L3	286			QKGYHHRTEINKKIYKIGQGYLIKDGKLIKN	_IYK(gl)IGQGYLIK_	1	78.488	0.0038684	0.57381	5749000	0
566	RPL3;RPL3;RPL3;RPL3;RPL3	60S ribosomal protein L3	224			QVFGQDEMIDVIGVTKGKGYKGVTSRWHTKK	_M(ox)IDVIGVTK(gl)GK_	1	102.4	4.98e-05	0.14446	503290	0
567	RPL35;RPL35;RPL35	60S ribosomal protein L35	25	0.805077		RGKKKEELLKQLDDLKVELSQLRVAKVTGGA	_(gl)QLDDLK(gl)VELSQLRVAK_	1	85.619	2.08e-06	-0.47707	903650	133460
568	RPL38	60S ribosomal protein L38	67			KAEKLKQSLPPGLAVKELK____________	_QSLPPGLAVK(gl)ELK_	1	83.499	3.44e-07	-0.21621	0	0
569	RPL4;RPL4;RPL4	60S ribosomal protein L4	364			LRVDKAAAAAAALQAKSDEKAAVAGKKPVVG	_AAAAAAALQAK(gl)SDEK_	1	161.76	1.17e-24	-0.23424	7735500	0
570	RPL4;RPL4;RPL4	60S ribosomal protein L4	20			RPLISVYSEKGESSGKNVTLPAVFKAPIRPD	_GESSGK(gl)NVTLPAVFK_	1	53.995	0.00455	1.0462	0	0
571	RPL5	60S ribosomal protein L5	220	0.863953		ADYMRYLMEEDEDAYKKQFSQYIKNSVTPDM	_HIM(ox)GQNVADYM(ox)RYLM(ox)EEDEDAYK(gl)K_	1	67.864	1.41e-06	0.39247	3840400	625330
572	RPL5	60S ribosomal protein L5	188	0.472781		IPHSTKRFPGYDSESKEFNAEVHRKHIMGQN	_RFPGYDSESK(gl)EFNAEVHRK_	1	104.89	5.73e-11	0.58281	3827100	929590
573	RPL5	60S ribosomal protein L5	284			PKMSLAQKKDRVAQKKASFLRAQERAAES__	_K(gl)ASFLRAQERAAES_	1	84.566	0.00033512	0.4481	2125200	0
574	RPL5	60S ribosomal protein L5	164			GLARTTTGNKVFGALKGAVDGGLSIPHSTKR	_VFGALK(gl)GAVDGGLSIPHSTK_	1	83.213	4.53e-13	-0.097485	0	0
575	RPL5	60S ribosomal protein L5	221			DYMRYLMEEDEDAYKKQFSQYIKNSVTPDMM	_K(gl)QFSQYIK_	1	51.113	0.0346373	0.26913	2198200	0
576	RPL6;RPL6;RPL6;RPL6;RPL6	60S ribosomal protein L6;60S ribosomal protein L6	94			KVEKKKKEKVLATVTKPVGGDKNGGTRVVKL	_VLATVTK(gl)PVGGDK_	1	55.33	0.0119484	0.43897	2907200	0
577	RPL7A;RPL7A	60S ribosomal protein L7a	34	0.698285		VKKQEAKKVVNPLFEKRPKNFGIGQDIQPKR	_VVNPLFEK(gl)RPK_	1	38.634	0.0352501	0.15091	998260	328370
578	RPL7A;RPL7A	60S ribosomal protein L7a	264	0.51029		RIAKLEKAKAKELATKLG_____________	_ELATK(gl)LG_	1	44.395	0.0214413	0.3231	7863200	2056200
579	RPL7A;RPL7A	60S ribosomal protein L7a	252	0.44073		WGGNVLGPKSVARIAKLEKAKAKELATKLG_	_SVARIAK(gl)LEK_	1	112.43	2.9e-06	0.1142	16636000	3600000
580	RPL7A;RPL7A	60S ribosomal protein L7a	11			_____MPKGKKAKGKKVAPAPAVVKKQEAKK	_K(gl)VAPAPAVVK_	1	71.241	0.00772739	0.17343	909380	0
581	RPL7L1;RPL7L1	60S ribosomal protein L7-like 1	8			________MAEQEQRKIPLVPENLLKKRKAY	_(ac)AEQEQRK(gl)IPLVPENLLK_	1	45.094	0.00779338	0.2529	5302500	0
582	RPL8;RPL8;RPL8;RPL8	60S ribosomal protein L8	144	0.778592		ASGNYATVISHNPETKKTRVKLPSGSKKVIS	_LARASGNYATVISHNPETK(gl)K_	1	96.79	1.52e-10	0.032145	9075600	2227100
583	RPL9;RPL9;RPL9	60S ribosomal protein L9	2	0.359591		______________MKTILSNQTVDIPENVD	_M(ox)K(gl)TILSNQTVDIPENVDITLK_	1	83.905	1.5e-07	0.5234	5122300	323250
584	RPL9;RPL9;RPL9;RPL9	60S ribosomal protein L9	174	0.844036		ALIQQATTVKNKDIRKFLDGIYVSEKGTVQQ	_DIRK(gl)FLDGIYVSEK_	1	82.609	0.000450561	0.75052	2171100	943410
585	RPL9;RPL9;RPL9;RPL9	60S ribosomal protein L9	168	0.630026		LVSNSAALIQQATTVKNKDIRKFLDGIYVSE	_LVSNSAALIQQATTVK(gl)NK_	1	105.39	1.45e-10	0.3897	12559000	4153000
586	RPLP0;RPLP0;RPLP0;RPLP0	60S acidic ribosomal protein P0	297	0.204726		AAATTAAPAAAAAPAKVEAKEESEESDEDMG	_AFLADPSAFVAAAPVAAATTAAPAAAAAPAK(gl)VEAK_	1	78.588	8.64e-09	0.19091	18363000	1028400
587	RPLP0;RPLP0P6;RPLP0;RPLP0;RPLP0	60S acidic ribosomal protein P0;60S acidic ribosomal protein P0-like	162			ISRGTIEILSDVQLIKTGDKVGASEATLLNM	_ILSDVQLIK(gl)TGDK_	1	49.929	0.00281359	0.84332	0	0
588	RPS11	40S ribosomal protein S11	12	0.806292		____MADIQTERAYQKQPTIFQNKKRVLLGE	_(ac)ADIQTERAYQK(gl)QPTIFQNK_	1	61.102	0.000208142	0.65664	1617600	425230
589	RPS11	40S ribosomal protein S11	45	0.768399		KEKLPRYYKNIGLGFKTPKEAIEGTYIDKKC	_NIGLGFK(gl)TPK_	1	96.135	0.000240475	-0.26894	10093000	3403200
590	RPS11	40S ribosomal protein S11	30	0.649218		TIFQNKKRVLLGETGKEKLPRYYKNIGLGFK	_RVLLGETGK(gl)EK_	1	83.106	0.000292754	0.23923	2387100	634920
591	RPS11	40S ribosomal protein S11	38	0.587036		VLLGETGKEKLPRYYKNIGLGFKTPKEAIEG	_LPRYYK(gl)NIGLGFK_	1	70.412	0.00307548	0.068304	2281200	415650
592	RPS11	40S ribosomal protein S11	20			QTERAYQKQPTIFQNKKRVLLGETGKEKLPR	_(gl)QPTIFQNK(gl)K_	1	103.21	5.45e-05	0.26218	5647400	0
593	RPS11	40S ribosomal protein S11	48			LPRYYKNIGLGFKTPKEAIEGTYIDKKCPFT	_TPK(gl)EAIEGTYIDK_	1	65.565	0.00504558	0.13293	3439300	0
594	RPS16	40S ribosomal protein S16	131	0.725815		DRTLLVADPRRCESKKFGGPGARARYQKSYR	_K(gl)FGGPGARARYQK_	1	67.456	0.00372696	-0.11	1757000	783830
595	RPS17;RPS17L	40S ribosomal protein S17;40S ribosomal protein S17-like	129			LSNLQVTQPTVGMNFKTPRGPV_________	_LLDFGSLSNLQVTQPTVGM(ox)NFK(gl)TPRGPV_	1	91.722	1.36e-15	1.202	3491600	0
596	RPS17;RPS17L;RPS17;RPS17L	40S ribosomal protein S17;40S ribosomal protein S17-like	103	0.567738		VSALDQEIIEVDPDTKEMLKLLDFGSLSNLQ	_LQEEERERRDNYVPEVSALDQEIIEVDPDTK(gl)EM(ox)LK_	1	155.15	5.68e-44	-0.03535	10352000	2008600
597	RPS18	40S ribosomal protein S18	94	1.64619		IPDWFLNRQKDVKDGKYSQVLANGLDNKLRE	_DGK(gl)YSQVLAN(de)GLDNK_	1	83.106	1.72e-05	-0.55575	1203800	971610
598	RPS2;RPS2;RPS2;RPS2;RPS2	40S ribosomal protein S2	89	1.39316		KIKSLEEIYLFSLPIKESEIIDFFLGASLKD	_IYLFSLPIK(gl)E_	1	42.001	0.0127006	-0.66533	597780	379420
599	RPS23;RPS23;RPS23;RPS23;RPS23	40S ribosomal protein S23	48			GTALKANPFGGASHAKGIVLEKVGVEAKQPN	_ANPFGGASHAK(gl)GIVLEK_	1	93.754	7.66e-07	1.1544	3960700	0
600	RPS23;RPS23;RPS23;RPS23;RPS23	40S ribosomal protein S23	37			WHDKQYKKAHLGTALKANPFGGASHAKGIVL	_AHLGTALK(gl)ANPFGGASHAK_	1	91.589	3.73e-10	-0.22701	4915800	0
601	RPS24;RPS24	40S ribosomal protein S24;40S ribosomal protein S24	37	0.328799		QMVIDVLHPGKATVPKTEIREKLAKMYKTTP	_ATVPK(gl)TEIREK_	1	107.65	2.14e-06	-0.40666	13677000	2330900
602	RPS3;RPS3;RPS3;RPS3	40S ribosomal protein S3	246	0.195989		DEILPTTPISEQKGGKPEPPAMPQPVPTA__	_GGK(gl)PEPPAM(ox)PQPVPTA_	1	56.407	0.0107895	-0.052495	8381900	656380
603	RPS3;RPS3;RPS3;RPS3;RPS3;RPS3;RPS3;RPS3;RPS3	40S ribosomal protein S3	7	0.495534		_________MAVQISKKRKFVADGIFKAELN	_(ac)AVQISK(gl)K_	1	105.2	2.93e-07	0.50976	5225600	679720
604	RPS3;RPS3;RPS3;RPS3;RPS3;RPS3;RPS3;RPS3;RPS3;RPS3;RPS3	40S ribosomal protein S3	18	0.688774		VQISKKRKFVADGIFKAELNEFLTRELAEDG	_FVADGIFK(gl)AE_	1	61.958	0.00505058	0.3141	2607600	871170
605	RPS3A;RPS3A;RPS3A;RPS3A;RPS3A;RPS3A	40S ribosomal protein S3a	27			GGKKGAKKKVVDPFSKKDWYDVKAPAMFNIR	_VVDPFSK(gl)K_	1	83.775	0.00147107	0.18493	2153100	0
606	RPS3A;RPS3A;RPS3A;RPS3A;RPS3A;RPS3A;RPS3A;RPS3A	40S ribosomal protein S3a	182	0.77196		KMMEIMTREVQTNDLKEVVNKLIPDSIGKDI	_M(ox)M(ox)EIM(ox)TREVQTNDLK(gl)EVVNK_	1	78.088	2.27e-07	-0.19529	5243100	1585500
607	RPS3A;RPS3A;RPS3A;RPS3A;RPS3A;RPS3A;RPS3A;RPS3A;RPS3A;RPS3A;RPS3A;RPS3A	40S ribosomal protein S3a	63	0.381129		LVTRTQGTKIASDGLKGRVFEVSLADLQNDE	_IASDGLK(gl)GRVFE_	1	55.314	0.00277893	0.13712	1692200	295350
608	RPS3A;RPS3A;RPS3A;RPS3A;RPS3A;RPS3A;RPS3A;RPS3A;RPS3A;RPS3A;RPS3A;RPS3A	40S ribosomal protein S3a	56			IRNIGKTLVTRTQGTKIASDGLKGRVFEVSL	_TLVTRTQGTK(gl)IASDGLK_	1	82.007	4.61e-06	-1.003	490920	0
609	RPS5	40S ribosomal protein S5;40S ribosomal protein S5, N-terminally processed	201	4.14715		NSYAIKKKDELERVAKSNR____________	_DELERVAK(gl)SNR_	1	144.68	1.54e-10	-0.16386	4690300	9639100
610	RPS5	40S ribosomal protein S5;40S ribosomal protein S5, N-terminally processed	193	3.71106		INAAKGSSNSYAIKKKDELERVAKSNR____	_K(gl)DELERVAKSNR_	0.899006	79.089	0.000178	0.28064	1117000	1629700
611	RPS5	40S ribosomal protein S5;40S ribosomal protein S5, N-terminally processed	42	3.17945		DVQINDISLQDYIAVKEKYAKYLPHSAGRYA	_ISLQDYIAVK(gl)EK_	1	45.79	0.0199405	-0.11758	425860	438430
612	RPS5	40S ribosomal protein S5;40S ribosomal protein S5, N-terminally processed	18	0.887538		EWETAAPAVAETPDIKLFGKWSTDDVQINDI	_TPDIK(gl)LFGK_	1	81.92	6.52e-06	0.15734	18029000	21228000
613	RPS6;RPS6	40S ribosomal protein S6	23	0.407017		PATGCQKLIEVDDERKLRTFYEKRMATEVAA	_LIEVDDERK(gl)LRTFYEK_	1	50.874	0.00513337	0.90197	6471200	1651900
614	RPS6;RPS6	40S ribosomal protein S6;40S ribosomal protein S6	243	0.336433		IAKRRRLSSLRASTSKSESSQK_________	_RRRLSSLRASTSK(gl)SESSQK_	1	37.817	0.0174575	-0.091612	2308200	526550
615	RPS6;RPS6	40S ribosomal protein S6;40S ribosomal protein S6	211			KQRTKKNKEEAAEYAKLLAKRMKEAKEKRQE	_EEAAEYAK(gl)LLAK_	1	65.092	0.00792541	-0.32554	1458100	0
616	RPS6;RPS6	40S ribosomal protein S6;40S ribosomal protein S6	149			GPKRASRIRKLFNLSKEDDVRQYVVRKPLNK	_LFNLSK(gl)E_	1	51.436	0.0373027	-0.35032	663770	0
617	RPS7	40S ribosomal protein S7	169	0.579573		IKVHLDKAQQNNVEHKVETFSGVYKKLTGKD	_AQQNNVEHK(gl)VETFSGVYK_	1	88.551	7.7e-07	1.8471	9789700	2658800
618	RPS7	40S ribosomal protein S7	178			QNNVEHKVETFSGVYKKLTGKDVNFEFPEFQ	_VETFSGVYK(gl)K_	1	55.314	0.0201112	-1.0881	1042100	0
619	RPS7;RPS7	40S ribosomal protein S7	49	0.602837		SDLKAQLRELNITAAKEIEVGGGRKAIIIFV	_LNITAAK(gl)E_	1	66.299	0.0101397	-0.2761	1089600	211800
620	RPS7;RPS7	40S ribosomal protein S7	37	0.52381		GISQALLELEMNSDLKAQLRELNITAAKEIE	_MNSDLK(gl)AQLRE_	1	116.51	3.25e-06	0.67829	7892400	1861800
621	RPS7;RPS7	40S ribosomal protein S7	70			GGRKAIIIFVPVPQLKSFQKIQVRLVRELEK	_AIIIFVPVPQLK(gl)SFQK_	1	78.069	9.97e-06	-0.30144	896670	0
622	RPS8;RPS8	40S ribosomal protein S8	26	0.353663		RRKTGGKRKPYHKKRKYELGRPAANTKIGPR	_RK(gl)YELGRPAANTK_	1	34.909	0.0302283	0.18149	10507000	1889400
623	RPS8;RPS8	40S ribosomal protein S8	157			SKKIQKKYDERKKNAKISSLLEEQFQQGKLL	_NAK(gl)ISSLLEEQFQQGK_	1	106.52	7.72e-08	0.68043	3286400	0
624	RPS8;RPS8	40S ribosomal protein S8	201			DGYVLEGKELEFYLRKIKARKGK________	_ELEFYLRK(gl)IK_	1	68.626	0.0110352	-0.58754	831200	0
625	RPSAP58;RPSA;RPSA;RPSAP58	40S ribosomal protein SA	11	0.676385		_____MSGALDVLQMKEEDVLKFLAAGTHLG	_(ac)SGALDVLQM(ox)K(gl)EEDVLK_	1	51.286	8.02e-10	0.96606	2458600	739060
626	RREB1	Ras-responsive element-binding protein 1	913	0.437318		EPLDFSQKGLALVQVKQENISFLSPSSLVPY	_GLALVQVK(gl)QE_	1	94.804	0.00128153	0.31654	3108200	707970
627	RREB1;RREB1	Ras-responsive element-binding protein 1	615			SIIEALLPLSMEAKIKQEITEGELKAFMTAP	_IK(gl)QEITEGELK_	1	89.9	1.41e-45	-0.56796	0	0
628	RRP7A;RRP7B	Ribosomal RNA-processing protein 7 homolog A;Putative ribosomal RNA-processing protein 7 homolog B	183	4.58621		ALRVEVDTFMEAYDQKIAEEEAKAKEEEGVP	_AYDQK(gl)IAEEE_	1	36.585	0.037838	-0.24534	493470	1376100
629	RSF1;RSF1;RSF1	Remodeling and spacing factor 1	277	1.02346		LENRSTANVLEETTVKKEKEDEKELVKLPVI	_SEEQPM(ox)DLENRSTANVLEETTVK(gl)K_	1	92.336	1.42e-12	0.21349	5836600	349880
630	RSF1;RSF1;RSF1	Remodeling and spacing factor 1	323	0.580298		IKEESDSFKENVKPIKVEVKECRADPKDTKS	_ENVKPIK(gl)VEVK_	0.998366	78.069	0.00424943	0.51354	2937300	896900
631	RSF1;RSF1;RSF1	Remodeling and spacing factor 1	294	0.448642		EKEDEKELVKLPVIVKLEKPLPENEEKKIIK	_LPVIVK(gl)LEK_	1	97.594	0.000156056	0.73539	14678000	3301500
632	RSL1D1;RSL1D1	Ribosomal L1 domain-containing protein 1	254	0.974967		EKLPEKWESVKLLFVKTEKSAALPIFSSFVS	_LLFVK(gl)TEK_	1	94.363	0.000556277	0.62433	1093400	481430
633	RUVBL1;RUVBL1;RUVBL1;RUVBL1	RuvB-like 1	225	0.384925		ATEFDLEAEEYVPLPKGDVHKKKEIIQDVTL	_YVPLPK(gl)GDVHK_	1	62.528	0.00172838	0.3496	8492400	1403200
634	SAE1;SAE1	SUMO-activating enzyme subunit 1	109	0.387654		ASLERAQNLNPMVDVKVDTEDIEKKPESFFT	_RAQNLNPM(ox)VDVK(gl)VDTE_	1	30.956	0.0298	0.14316	2961300	549060
635	SAFB;SAFB;SAFB;SAFB;SAFB	Scaffold attachment factor B1	578	0.785544		TVVMDKSKGVPVISVKTSGSKERASKSQDRK	_GVPVISVK(gl)TSGS(ph)K_	1	130.27	2.04e-10	0.13374	10272000	915500
636	SAFB;SAFB;SAFB;SAFB;SAFB	Scaffold attachment factor B1	392	0.655444		GADQKMSSPEDDSDTKRLSKEEKGRSSCGRN	_M(ox)SSPEDDSDTK(gl)RLSK_	1	130.56	1.53e-11	0.0035522	6347100	1479500
637	SAFB;SAFB;SAFB;SAFB;SAFB	Scaffold attachment factor B1	381			PPAPKESSTSEGADQKMSSPEDDSDTKRLSK	_ESSTSEGADQK(gl)M(ox)SSPEDDSDTK_	1	39.288	0.00821318	0.48687	589780	0
638	SAFB;SAFB;SAFB;SAFB;SAFB;SAFB2	Scaffold attachment factor B1;Scaffold attachment factor B2	293	0.434397		AHAQSSKADSLLAVVKREPAEQPGDGERTDC	_SLLAVVK(gl)REPAEQPGDGE_	1	110.31	9.21e-08	0.43119	144860000	36670000
639	SAFB;SAFB;SAFB;SAFB;SAFB;SAFB2	Scaffold attachment factor B1;Scaffold attachment factor B2	350	0.244035		AEAPTEAPSPEARDSKEDGRKFDFDACNEVP	_LAEAPTEAPS(ph)PEARDSK(gl)E_	1	40.349	0.00458462	0.050868	6973800	797530
640	SAFB2	Scaffold attachment factor B2	517	0.574775		KEKLSSVDRHHSVEIKIEKTVIKKEEKIEKK	_LSSVDRHHSVEIK(gl)IEK_	1	205.43	3.24e-27	0.17781	90332000	29154000
641	SAFB2	Scaffold attachment factor B2	391	0.542383		GADQKMSSFKEEKDIKPIIKDEKGRVGSGSG	_DIK(gl)PIIK_	1	87.895	0.000154911	-0.40274	59601000	3363200
642	SAFB2	Scaffold attachment factor B2	395	0.476022		KMSSFKEEKDIKPIIKDEKGRVGSGSGRNLW	_DIKPIIK(gl)DEK_	0.990968	59.542	0.0163724	0.37492	9418800	2535600
643	SAFB2	Scaffold attachment factor B2	551	0.431987		KPEDIKKEEKDQDELKPGPTNRSRVTKSGSR	_DQDELK(gl)PGPTNRSRVTK_	1	81.428	4.85e-06	0.48948	7020500	1562800
644	SAFB2	Scaffold attachment factor B2	380			PPAPKESSTSEGADQKMSSFKEEKDIKPIIK	_ESSTSEGADQK(gl)M(ox)SSFK_	1	41.871	0.0144179	1.0402	1662600	0
645	SALL2;SALL2;SALL2	Sal-like protein 2	475	0.727734		KAEEEAATPGGGVERKPLVASTTALSATESL	_RK(gl)PLVASTTALSATE_	1	77.527	6.54e-06	0.15639	1064500	423610
646	SALL4	Sal-like protein 4	475	0.357949		SVPDPIDEPSLSLDSKPVLVTTSVGLPQNLS	_SK(gl)PVLVTTSVGLPQNLSSGTNPK_	1	98.533	4.7e-13	0.49581	4777700	1019100
647	SALL4;SALL4	Sal-like protein 4	156	0.630879		EDMKEKPDAESVVYLKTETALPPTPQDISYL	_SVVYLK(gl)TE_	1	78.516	0.00832093	0.011075	3355000	909230
648	SAMHD1	SAM domain and HD domain-containing protein 1	622	0.878198		PTRLREASKSRVQLFKDDPM___________	_SRVQLFK(gl)DDPM(ox)_	1	35.774	0.0219	-1.1149	2376900	1091800
649	SAMHD1	SAM domain and HD domain-containing protein 1	469	0.772174		FKYVGETQPTGQIKIKREDYESLPKEVASAK	_IK(gl)REDYESLPK_	1	108.66	2.05e-06	-0.10201	8657000	3131100
650	SAP130;SAP130	Histone deacetylase complex subunit SAP130	904	0.497879		NSTDDEKSTAKSLLVKAEKRKSPPKEYIDEE	_SLLVK(gl)AEK_	1	97.163	0.000428104	0.34166	9521400	2575400
651	SAP18	Histone deacetylase complex subunit SAP18	13	0.661053		___MAVESRVTQEEIKKEPEKPIDREKTCPL	_M(ox)AVESRVTQEEIK(gl)K_	1	148.36	1.17e-11	-0.07034	152870000	55736000
652	SARNP;SARNP;CIP29	SAP domain-containing ribonucleoprotein	386	0.331059		DETEEEETKPIELPVKEEEPPEKTVDVAAEK	_TKPIELPVK(gl)E_	0.997083	37.968	0.0385637	0.17068	1619400	260630
653	SARNP;SARNP;CIP29	SAP domain-containing ribonucleoprotein	379			NEEDVLGDETEEEETKPIELPVKEEEPPEKT	_TK(gl)PIELPVK_	1	76.143	0.0405587	0.19605	1570700	0
654	SART1	U4/U6.U5 tri-snRNP-associated protein 1	709	0.434589		FTQDFKEKDGYKPDVKIEYVDETGRKLTPKE	_DGYKPDVK(gl)IEYVDETGRK_	0.987942	85.203	2.92e-06	0.036446	14460000	2497600
655	SART1;SART1	U4/U6.U5 tri-snRNP-associated protein 1	141	2.25845		LRAKLGLKPLEVNAIKKEAGTKEEPVTADVI	_PLEVNAIK(gl)K_	1	204.17	9.23e-22	-0.26365	453220000	526390000
656	SART1;SART1	U4/U6.U5 tri-snRNP-associated protein 1	94	1.91462		HGRERSQAEPSERRVKREKRDDGYEAAASSK	_RSQAEPSERRVK(gl)REK_	1	83.106	5.4e-05	-1.1724	169530000	191470000
657	SATB1	DNA-binding protein SATB1	718	1.08428		DEEAIQTLSAQLDLPKYTIIKFFQNQRYYLK	_AIQTLSAQLDLPK(gl)YTIIK_	1	38.824	0.00832298	-0.0085504	778480	296030
658	SATB1	DNA-binding protein SATB1	776	0.99691		EESVQDKNTNTLFSVKLEEELSVEGNTDINT	_NTNTLFSVK(gl)LEEE_	1	55.452	0.00189265	-0.17019	3753900	1970400
659	SATB2;SATB2;SATB2;SATB2	DNA-binding protein SATB2	30	0.915963		DRRSGSPDVKGPPPVKVARLEQNGSPMGARG	_GPPPVK(gl)VARLE_	1	64.394	0.0120839	-0.064641	659780	355790
660	SCAF11;SCAF11;SCAF11	Protein SCAF11	601			ESSLVEITEHKDFTLKTEELIESPKLESSEG	_DFTLK(gl)TEE_	1	49.813	0.0335436	0.78601	672560	0
661	SCAPER;SCAPER;SCAPER	S phase cyclin A-associated protein in the endoplasmic reticulum	1368	0.617807		QTPGQAENQPYQPKGKCLGSQDYLELANRFP	_GK(gl)CLGSQ(de)DYLE_	1	37.594	0.0211	-0.0060108	2230600	664020
662	SCML2	Sex comb on midleg-like protein 2	252			LQPPGTSVPIVKNIAKTESSPSEASQHSMQS	_NIAK(gl)TESSPSEASQHSM(ox)QSPQK_	1	77.681	1.15e-07	0.72944	2268000	0
663	SCML2	Sex comb on midleg-like protein 2	177			KEPPKPPLNNFKVGMKLEAIDKKNPYLICPA	_VGM(ox)K(gl)LEAIDK_	1	47.288	0.00241	-1.6435	0	0
664	SEC23IP;SEC23IP	SEC23-interacting protein	910	0.270712		STQLQEELEKVANQIKEEEEKQVVEAEKVVE	_VANQIK(gl)EEEEK_	1	124.42	6.65e-07	-0.15973	8124000	1114500
665	SEC31A;SEC31A;SEC31A;SEC31A	Protein transport protein Sec31A	545			EESPAAEEQLLGEHIKEEKEESEFLPSSGGT	_EQLLGEHIK(gl)E_	1	60.178	0.013651	-0.487	1362200	0
666	SERBP1	Plasminogen activator inhibitor 1 RNA-binding protein	102	0.330697		GVVDKKEETQPPVALKKEGIRRVGRRPDQQL	_KEETQPPVALK(gl)K_	1	101.75	0.00019637	0.85169	12802000	2078200
667	SET;SET	Protein SET	83	0.249004		KVEQKYNKLRQPFFQKRSELIAKIPNFWVTT	_LRQPFFQK(gl)RSELIAK_	1	106.44	2.09e-06	-0.61989	12314000	1873800
668	SF3A2	Splicing factor 3A subunit 2	10	22.5675		______MDFQHRPGGKTGSGGVASSSESNRD	_(ac)M(ox)DFQHRPGGK(gl)TGSGGVASSSE_	1	70.453	6.7e-07	-0.60743	418590	9699400
669	SF3B1	Splicing factor 3B subunit 1	413	5.05343		PLSDEELDAMFPEGYKVLPPPAGYVPIRTPA	_GYK(gl)VLPPPAGYVPIRTPARK_	1	111.66	2.44e-12	0.49425	33264000	86232000
670	SF3B2;SF3B2	Splicing factor 3B subunit 2	563	56.5328		TMKSKMREKVRPKMGKIDIDYQKLHDAFFKW	_M(ox)GK(gl)IDIDYQK_	1	83.775	0.00409677	-0.77695	2418400	72485000
671	SF3B2;SF3B2;SF3B2	Splicing factor 3B subunit 2	680	94.3685		YHAGGWGKPPVDETGKPLYGDVFGTNAAEFQ	_TGK(gl)PLYGDVFGTNAAE_	1	43.454	0.00745	-0.56519	300670	19544000
672	SFPQ	Splicing factor, proline- and glutamine-rich	338	0.954795		PGEVFINKGKGFGFIKLESRALAEIAKAELD	_GFGFIK(gl)LE_	1	41.029	0.0346268	0.2735	1025400	482690
673	SIRT1;SIRT1;SIRT1	NAD-dependent protein deacetylase sirtuin-1;SirtT1 75 kDa fragment	601			RNVESIAEQMENPDLKNVGSSTGEKNERTSV	_(gl)QM(ox)ENPDLK(gl)NVGSSTGEK_	1	61.648	0.000212	-0.15152	546410	0
674	SIX4	Homeobox protein SIX4	17	0.760722		SSSSPTGQIASAADIKQENGMESASEGQEAH	_(ac)SSSSPTGQIASAADIK(gl)QE_	1	45.704	0.00139671	-0.15653	1429700	549130
675	SLC35F5;SLC35F5;SLC35F5	Solute carrier family 35 member F5	230	0.308178		LSRMSYPVKEQESILKTVGKLTATQVAKISF	_QESILK(gl)TVGK_	1	47.228	0.0108861	0.28808	4478700	585630
676	SLK	STE20-like serine/threonine-protein kinase	691	0.422327		TTQIDKEKKEIPVSIKKEPEVTVVSQPTEPQ	_EIPVSIK(gl)K_	1	74.53	0.00230742	0.1413	5004900	797110
677	SLK	STE20-like serine/threonine-protein kinase	487			EKDQEKQQMFENKLIKSEEIKDTILQTVDLV	_LIK(gl)SEEIK_	1	59.908	0.0211696	1.2924	646370	0
678	SLX4	Structure-specific endonuclease subunit SLX4	1575			ITPMPQYSIMETPVLKKELDRFGVRPLPKRQ	_VPITPM(ox)PQYSIM(ox)ETPVLK(gl)K_	1	58.672	3.35e-18	-1.4322	0	0
679	SMAD4	Mothers against decapentaplegic homolog 4	159	3.18734		SGLTLQSNAPSSMMVKDEYVHDFEGQPSLST	_RVVSPGIDLSGLTLQSNAPSSM(ox)MVK(gl)DE_	1	75.226	1.44e-08	-0.22799	4356500	7152700
680	SMARCAD1	SWI/SNF-related matrix-associated actin-dependent regulator of chromatin subfamily A containing DEAD/H box 1	724	0.341295		AHAKQIIKPFILRRVKEEVLKQLPPKKDRIE	_PFILRRVK(gl)E_	1	37.613	0.0185	-0.51457	958030	187410
681	SMARCAD1;SMARCAD1	SWI/SNF-related matrix-associated actin-dependent regulator of chromatin subfamily A containing DEAD/H box 1	77	0.528437		KTEDSSVPETPDNERKASISYFKNQRGIQYI	_RK(gl)ASISYFK_	1	101.39	0.00191727	0.12688	6973300	2188500
682	SMARCAD1;SMARCAD1	SWI/SNF-related matrix-associated actin-dependent regulator of chromatin subfamily A containing DEAD/H box 1	229			SEPYEEDEFNDDQSIKKTRLDHGEESNESAE	_DEFNDDQSIK(gl)K_	1	39.509	0.0203923	0.25551	442480	0
683	SMARCB1;SMARCB1;SMARCB1	SWI/SNF-related matrix-associated actin-dependent regulator of chromatin subfamily B member 1	115	0.634312		AVSISTEPPTYLREQKAKRNSQWVPTLPNSS	_AVSISTEPPTYLREQK(gl)AK_	1	47.09	0.00469164	-0.07062	1677000	514350
684	SMARCC2;SMARCC2	SWI/SNF complex subunit SMARCC2	879	1.07653		EVLKEVVESEGERKTKVERDIGEGNLSTAAA	_TK(gl)VERDIGEGNLSTAAAAALAAAAVK_	1	140.66	4.81e-28	-0.084575	4174400	1660300
685	SMC5	Structural maintenance of chromosomes protein 5	719			KRQLEQKISSKLGSLKLMEQDTCNLEEEERK	_LGSLK(gl)LM(ox)E_	1	48.794	0.0362742	-0.069892	566040	0
686	SMCHD1	Structural maintenance of chromosomes flexible hinge domain-containing protein 1	1374	0.374071		LMILPDPEKPVRLNVKYDKDASFLAGGLFTD	_PVRLNVK(gl)YDK_	1	134.13	1.16e-10	-0.90092	55848000	8073000
687	SNAI1	Zinc finger protein SNAI1	16	0.209722		MPRSFLVRKPSDPNRKPNYSELQDSNPEFTF	_PRSFLVRKPSDPNRK(gl)PNYSE_	0.984589	43.598	0.00657941	-0.60328	2019800	244300
688	SNAI1	Zinc finger protein SNAI1	146	0.190249		GLGQVPKQLAQLSEAKDLQARKAFNCKYCNK	_(gl)QLAQLSEAK(gl)DLQARK_	1	104.89	4.97e-06	0.85862	8029800	545670
689	SNIP1	Smad nuclear-interacting protein 1	30	0.670627		RHRDGDVVLPAGVVVKQERLSPEVAPPAHRR	_RGSRRRHRDGDVVLPAGVVVK(gl)QE_	1	69.398	1.13e-06	-0.099681	7738900	2820500
690	SNRNP200;SNRNP200	U5 small nuclear ribonucleoprotein 200 kDa helicase	46	1.8453		TRRDEPTGEVLSLVGKLEGTRMGDKAQRTKP	_VLSLVGK(gl)LE_	1	36.424	0.0286691	-0.12174	551370	446170
691	SNRPD2	Small nuclear ribonucleoprotein Sm D2	8	16.1534		________MSLLNKPKSEMTPEELQKREEEE	_PK(gl)SEM(ox)TPEELQK_	1	92.856	0.000240093	-0.042017	7103500	62647000
692	SNRPD3;SNRPD3;SNRPD3	Small nuclear ribonucleoprotein Sm D3	8	0.366692		________MSIGVPIKVLHEAEGHIVTCETN	_(ac)SIGVPIK(gl)VLHEAE_	1	80.979	0.000155615	0.59833	3132500	595730
693	SP1;SP1	Transcription factor Sp1	16	0.515237		MSDQDHSMDEMTAVVKIEKGVGGNNGGNGNG	_(ac)SDQDHSM(ox)DEM(ox)TAVVK(gl)IEK_	1	117.3	1.66e-09	-0.1885	25033000	3596800
694	SP3;SP3;SP3	Transcription factor Sp3	551	0.667962		LHPGENADSPADIRIKEEEPDPEEWQLSGDS	_NADSPADIRIK(gl)E_	1	100.55	4.89e-05	0.62103	823040	226240
695	SRRT;SRRT	Serrate RNA effector molecule homolog	150			GSIAEIDLGVPPPVMKTFKEFLLSLDDSVDE	_IDLGVPPPVMK(gl)TFK_	1	50.843	0.0227279	-0.32892	285410	0
696	SRSF1	Serine/arginine-rich splicing factor 1	38	1.36251		LPPDIRTKDIEDVFYKYGAIRDIDLKNRRGG	_DIEDVFYK(gl)YGAIRDIDLK_	1	60.764	0.000445906	0.28735	1651400	1020600
697	SRSF1	Serine/arginine-rich splicing factor 1	174	0.522381		VVEFVRKEDMTYAVRKLDNTKFRSHEFCLSN	_EDM(ox)TYAVRK(gl)LDNTK_	1	93.342	5.9e-05	-0.16787	5421100	952770
698	SSB;SSB	Lupus La protein	216	0.291268		VEAKLRAKQEQEAKQKLEEDAEMKSLEEKIG	_(gl)QK(gl)LEEDAEM(ox)K_	1	43.382	0.00852368	0.26975	2434500	440850
699	SSB;SSB;SSB;SSB	Lupus La protein	37			EYYFGDFNLPRDKFLKEQIKLDEGWVPLEIM	_FLK(gl)EQIK_	1	71.614	0.00495433	0.21037	3947700	0
700	SSB;SSB;SSB;SSB	Lupus La protein	116			TDEYKNDVKNRSVYIKGFPTDATLDDIKEWL	_NRSVYIK(gl)GFPTDATLDDIK_	1	70.413	7.67e-05	-0.018936	1815400	0
701	SSB;SSB;SSB;SSB;SSB	Lupus La protein	109	0.478026		SKPLPEVTDEYKNDVKNRSVYIKGFPTDATL	_NDVK(gl)NRSVYIK_	1	35.677	0.032	0.081408	2914700	805520
702	SSB;SSB;SSB;SSB;SSB	Lupus La protein	105	0.370275		RRSPSKPLPEVTDEYKNDVKNRSVYIKGFPT	_VTDEYK(gl)NDVK_	1	163.41	2.84e-17	0.79863	18028000	1989800
703	SSB;SSB;SSB;SSB;SSB	Lupus La protein	76			LTTDFNVIVEALSKSKAELMEISEDKTKIRR	_SK(gl)AELM(ox)EISEDK_	1	79.875	0.00169826	0.70747	2659300	0
704	SSB;SSB;SSB;SSB;SSB	Lupus La protein	86			ALSKSKAELMEISEDKTKIRRSPSKPLPEVT	_AELM(ox)EISEDK(gl)TK_	1	32.734	0.0273974	1.0967	625980	0
705	SSR4;SSR4;SSR4	Translocon-associated protein subunit delta	117	0.336774		YEVRFFDEESYSLLRKAQRNNEDISIIPPLF	_SYSLLRK(gl)AQRNNE_	1	113.76	4.13e-06	-0.089127	13190000	2937400
706	SSRP1	FACT complex subunit SSRP1	661	1.6534		GSSSKSSSRQLSESFKSKEFVSSDESSSGEN	_SSSRQLSESFK(gl)SK_	1	91.207	0.000302441	1.6711	616150	788360
707	ST18	Suppression of tumorigenicity 18 protein	942			RHLDEEIKELNESNLKIEADMMKLQTQITSM	_LNESNLK(gl)IE_	1	78.556	0.0349993	0.70167	1356200	0
708	SUB1;SUB1;SUB1	Activated RNA polymerase II transcriptional coactivator p15	41	0.400065		KRKKQVAPEKPVKKQKTGETSRALSSSKQSS	_(gl)QK(gl)TGETSRALSSSK_	1	56.215	0.0011	0.50748	3583900	462040
709	SUDS3	Sin3 histone deacetylase corepressor complex component SDS3	179	0.826209		NEKLTMELTGDSMEVKPIMTRKLRRRPNDPV	_LTM(ox)ELTGDSM(ox)EVK(gl)PIM(ox)TRK_	1	72.772	1.54e-05	0.074831	6022700	1893200
710	SUMO1;SUMO1;SUMO1;SUMO1	Small ubiquitin-related modifier 1	23	7.04448		PSTEDLGDKKEGEYIKLKVIGQDSSEIHFKV	_EGEYIK(gl)LK_	1	95.573	0.000501	0.06668	27643000	107220000
711	SUMO1;SUMO1;SUMO1;SUMO1	Small ubiquitin-related modifier 1	25	6.90416		TEDLGDKKEGEYIKLKVIGQDSSEIHFKVKM	_LK(gl)VIGQDSSEIHFK_	1	138.87	7.31e-12	-0.056959	25788000	88604000
712	SUMO1;SUMO1;SUMO1;SUMO1	Small ubiquitin-related modifier 1	37	5.63196		IKLKVIGQDSSEIHFKVKMTTHLKKLKESYC	_VIGQDSSEIHFK(gl)VK_	1	129.62	5.9e-09	-0.3473	59194000	168430000
713	SUMO1;SUMO1;SUMO1;SUMO1	Small ubiquitin-related modifier 1	7	1.51978		_________MSDQEAKPSTEDLGDKKEGEYI	_(ac)SDQEAK(gl)PSTEDLGDK(gl)K_	1	158.29	4.21e-19	1.1078	120170000	95435000
714	SUMO1;SUMO1;SUMO1;SUMO1	Small ubiquitin-related modifier 1	16			MSDQEAKPSTEDLGDKKEGEYIKLKVIGQDS	_(ac)SDQEAK(gl)PSTEDLGDK(gl)K_	1	111.33	5.36e-09	1.1078	3358500	0
715	SUMO2	Small ubiquitin-related modifier 2	11	3.08797	1.48025	_____MADEKPKEGVKTENNDHINLKVAGQD	_PK(gl)EGVK(gl)TENNDHINLK_	1	212.69	2.6e-35	0.27186	2165600000	3632400000
716	SUMO2	Small ubiquitin-related modifier 2	7		1.48025	_________MADEKPKEGVKTENNDHINLKV	_PK(gl)EGVK(gl)TENNDHINLK_	1	210.66	2.6e-35	0.27186	120310000	113720000
717	SUMO2;SUMO4	Small ubiquitin-related modifier 2;Small ubiquitin-related modifier 4	21	8.72184		PKEGVKTENNDHINLKVAGQDGSVVQFKIKR	_TENNDHINLK(gl)VAGQDGSVVQFK_	1	158.58	9.75e-19	-0.02389	32224000	149310000
718	SUMO2;SUMO4	Small ubiquitin-related modifier 2;Small ubiquitin-related modifier 4	33	1.55518		INLKVAGQDGSVVQFKIKRHTPLSKLMKAYC	_VAGQDGS(ph)VVQFK(gl)IK_	1	154.47	1.32e-12	0.79022	439750000	353840000
719	SUMO3-T90K		14	0.680586		__MHHHHHHASMSEEKPKEGVKTENDHINLK	_(ac)M(ox)HHHHHHASM(ox)SEEK(gl)PK_	1	32.702	0.00282288	-0.56387	22607000	2532600
720	SUMO3-T90K		99	0.612796		LEMEDEDTIDVFQQQKGG_____________	_DTIDVFQQQK(gl)GG_	1	59.198	0.00451782	0.45752	5604900	1561900
721	SUMO3-T90K;SUMO3		20	0.563494	0.469454	HHHASMSEEKPKEGVKTENDHINLKVAGQDG	_PK(gl)EGVK(gl)TEN(de)DHINLK_	1	201.29	9.33e-28	0.53855	43018000000	6758800000
722	SUMO3-T90K;SUMO3;SUMO3;SUMO3;SUMO3	Small ubiquitin-related modifier 3	29	2.4073		KPKEGVKTENDHINLKVAGQDGSVVQFKIKR	_TENDHINLK(gl)VAGQDGSVVQFK_	1	150.45	1.37e-17	0.34593	213610000	264210000
723	SUMO3;6His-SUMO3-T90K		7		0.483571	_________MSEEKPKEGVKTENDHINLKVA;MHHHHHHASMSEEKPKEGVKTENDHINLKVA	_PK(gl)EGVK(gl)TENDHINLK_	1	201.29	4.77e-27	0.56055	650930000	190580000
724	SUMO3;SUMO3;SUMO3;SUMO3	Small ubiquitin-related modifier 3	41	1.55518		INLKVAGQDGSVVQFKIKRHTPLSKLMKAYC	_VAGQDGS(ph)VVQFK(gl)IK_	1	154.47	1.32e-12	0.79022	439750000	353840000
725	SUMO3;SUMO3;SUMO3;SUMO3	Small ubiquitin-related modifier 3	20	0.763686	0.483571	_____MSEEKPKEGVKTENDHINLKVAGQDG;HHHASMSEEKPKEGVKTENDHINLKVAGQDG	_PK(gl)EGVK(gl)TENDHINLK_	1	201.29	4.77e-27	0.56055	32076000000	4962600000
726	SUMO3;SUMO3;SUMO3;SUMO3;SUMO2	Small ubiquitin-related modifier 3;Small ubiquitin-related modifier 2	50	2.49793		GSVVQFKIKRHTPLSKLMKAYCERQGLSMRQ;GSVVQFKIKRHTPLSKLMKAYCERQVRHLAP	_RHTPLSK(gl)LMK_	1	130.23	2.24e-06	-0.28054	1491000000	2082200000
727	SUMO3;SUMO3;SUMO3;SUMO3;SUMO2;SUMO4	Small ubiquitin-related modifier 3;Small ubiquitin-related modifier 2;Small ubiquitin-related modifier 4	53	1.11121		VQFKIKRHTPLSKLMKAYCERQGLSMRQIRF;VQFKIKRHTPLSKLMKAYCERQVRHLAPPQS	_LM(ox)K(gl)AYCE_	1	67.981	0.0318426	-0.56251	2334700	1583200
728	SUPT16H	FACT complex subunit SPT16	647	0.436956		YKTREAEEKEKEGIVKQDSLVINLNRSNPKL	_EGIVK(gl)QDSLVINLNRSNPK_	1	133.94	1.05e-16	0.53413	11328000	2139000
729	SYAP1	Synapse-associated protein 1	254			PLAEAVRPKTPPVVIKSQLKTQEDEEEISTS	_TPPVVIK(gl)SQLK_	1	76.82	0.0042715	0.44648	1929500	0
730	SYNCRIP;SYNCRIP	Heterogeneous nuclear ribonucleoprotein Q	168	0.211106		YSGQQPSVGTEIFVGKIPRDLFEDELVPLFE	_IFVGK(gl)IPRDLFEDE_	1	32.068	0.0384	0.56553	432040	53993
731	TARDBP;TARDBP;TARDBP	TAR DNA-binding protein 43	95			DNKRKMDETDASSAVKVKRAVQKTSDLIVLG	_M(ox)DETDASSAVK(gl)VK_	1	101.53	9.1e-05	-0.32359	2932800	0
732	TARDBP;TARDBP;TARDBP;TARDBP	TAR DNA-binding protein 43	181	0.457896		HMIDGRWCDCKLPNSKQSQDEPLRSRKVFVG	_LPNSK(gl)QSQDEPLRSRK_	1	102.39	1.34e-06	0.71333	5743900	1177200
733	TARDBP;TARDBP;TARDBP;TARDBP	TAR DNA-binding protein 43	251			DDQIAQSLCGEDLIIKGISVHISNAEPKHNS	_DLIIK(gl)GISVHISNAEPK_	1	36.593	0.02862	-0.19433	304710	0
734	TCF20	Transcription factor 20	929			LVSMETKLKSQSGQIKEEDFEQSKSQASFNN	_SQSGQIK(gl)EEDFEQSK_	1	83.106	0.000101991	0.69076	1401400	0
735	TCF20;TCF20	Transcription factor 20	1825			KAATEGSSEKTVLDSKPSVPTTSEGGPELEL	_TVLDSK(gl)PSVPTTSE_	1	50.562	0.023684	0.32352	709180	0
736	TCF7L2;TCF7L2;TCF7L2	Transcription factor 7-like 2	22	51.1591		GGGDDLGANDELISFKDEGEQEEKSSENSSA	_LISFK(gl)DE_	1	56.013	0.0228	-0.4553	405150	11077000
737	TCOF1;TCOF1;TCOF1	Treacle protein	755	0.510269		APVLPGKTGPTVTQVKAEKQEDSESSEEESD	_TGPTVTQVK(gl)AEK_	1	214.89	1.78e-56	0.22429	64340000	2361400
738	TCOF1;TCOF1;TCOF1	Treacle protein	600	0.456212		AKGPPQKAGPVAVQVKAEKPMDNSESSEESS	_AGPVAVQVK(gl)AEK_	1	163.8	2.34e-16	0.71229	68014000	14671000
739	TFAP2A;TFAP2A;TFAP2A;TFAP2A;TFAP2A	Transcription factor AP-2-alpha	12	1.82438		____MKMLWKLTDNIKYEDCEDRHDGTSNGT	_LTDNIK(gl)YE_	1	96.034	0.00853022	-0.051177	3111100	2990900
740	TFAP2C	Transcription factor AP-2 gamma	10	0.884574		______MLWKITDNVKYEEDCEDRHDGSSNG	_ITDNVK(gl)YEE_	1	52.725	0.0264868	-0.32244	924310	396520
741	TFCP2;TFCP2;TFCP2L1;UBP1;UBP1	Alpha-globin transcription factor CP2;Transcription factor CP2-like protein 1;Upstream-binding protein 1	50	0.854144		AGAYSMSDVLALPIFKQEESSLPPDNENKIL	_VLALPIFK(gl)QEE_	1	47.288	0.00611582	-0.075553	7480500	3314000
742	TFEB;TFEB;TFEB;TFEB	Transcription factor EB	433	0.808745		SPSGMNMAELAQQVVKQELPSEEGPGEALML	_LAQQVVK(gl)QE_	1	117.3	0.000572881	0.71064	6364200	2349000
743	TFPT;TFPT	TCF3 fusion partner	216	0.643375		RAGNALTPELAPVQIKVEEDFGFEADEALDS	_LAPVQIK(gl)VEE_	1	52.167	0.00748635	-0.19708	16130000	5361700
744	TH1L	Negative elongation factor C/D	567	0.486641		LFLPILENDSIAGTIKTEGEHDPVTEFIAHC	_NDSIAGTIK(gl)TE_	1	46.73	0.00723146	0.42994	2704100	777720
745	THOC1	THO complex subunit 1	408			NEGCPSFVKERTSDTKPTRIIRKRTAPEDFL	_ERTSDTK(gl)PTRIIRK_	1	66.215	0.00298178	0.32462	4181800	0
746	TIPRL	TIP41-like protein	245			SLFTEPNEISQYLPIKEAVCEKLIFPERIDP	_ISQYLPIK(gl)E_	1	45.598	0.00980494	0.19122	499590	0
747	TMCO5A;TMCO5A;TMCO5A;TMCO5A;TMCO5A	Transmembrane and coiled-coil domain-containing protein 5A	105			RKNKTLVHSITELQQKLTRKSQKITNCEQSS	_TLVHSITELQQK(gl)LTRK_	1	38.028	6.43e-08	-2.7616	0	0
748	TMPO;TMPO	Lamina-associated polypeptide 2, isoforms beta/gamma;Thymopoietin;Thymopentin	401			FSSKYVPKYVPLADVKSEKTKKGRSIPVWIK	_YVPLADVK(gl)SEK_	1	125.28	3.41e-10	-0.45025	4099000	0
749	TMPO;TMPO;TMPO;TMPO	Lamina-associated polypeptide 2, isoforms beta/gamma;Thymopoietin;Thymopentin;Lamina-associated polypeptide 2, isoform alpha;Thymopoietin;Thymopentin	17	0.613094		PEFLEDPSVLTKDKLKSELVANNVTLPAGEQ	_LK(gl)SELVANNVTLPAGEQRK_	1	108.14	2.11e-12	0.12775	5743600	1333100
750	TNPO2	Transportin-2	334	0.264464		DVEEDEAVPDSEQDIKPRFHKSRTVTLPHEA	_(gl)QDIK(gl)PRFHK_	1	46.985	0.0187597	0.69765	2854100	461980
751	TOMM20	Mitochondrial import receptor subunit TOM20 homolog	61			KLAKERAGLSKLPDLKDAEAVQKFFLEEIQL	_LPDLK(gl)DAEAVQK_	1	39.424	0.0285	0.24363	859330	0
752	TOMM34	Mitochondrial import receptor subunit TOM34	197			NRVPSAGDVEKARVLKEEGNELVKKGNHKKA	_ARVLK(gl)EEGNELVK_	1	62.68	0.00621792	0.42674	1730600	0
753	TOP1	DNA topoisomerase 1	137	0.419982		DDGYFVPPKEDIKPLKRPRDEDDADYKPKKI	_PLK(gl)RPRDEDDADYKPK_	1	77.08	1.14e-05	0.29349	1251300	331430
754	TOP1	DNA topoisomerase 1	117			IKKEKENGFSSPPQIKDEPEDDGYFVPPKED	_ENGFSSPPQIK(gl)DEPEDDGYFVPPK_	1	58.015	2.66e-05	-0.027862	21654000	0
755	TOP2A	DNA topoisomerase 2-alpha	1367	0.639942		GTKTKKQTTLAFKPIKKGKKRNPWSDSESDR	_(gl)QTTLAFKPIK(gl)K_	0.972035	53.995	0.0121812	0.26426	1652500	579440
756	TOP2A	DNA topoisomerase 2-alpha	1321	0.444867		IEMKAEAEKKNKKKIKNENTEGSPQEDGVEL	_IK(gl)NENTEGS(ph)PQEDGVELEGLK_	1	183.45	1.09e-24	0.52371	32789000	4829900
757	TOP2A	DNA topoisomerase 2-alpha	1466	0.33332		KPQKSVVSDLEADDVKGSVPLSSSPPATHFP	_SVVSDLEADDVK(gl)GSVPLSSSPPATHFPDETEITNPVPK_	1	52.909	3.67e-05	0.23448	15289000	2359400
758	TOP2A	DNA topoisomerase 2-alpha	261			IAGSTKDVKVFLNGNKLPVKGFRSYVDMYLK	_VFLNGNK(gl)LPVK_	1	77.185	0.00418339	0.2608	2468600	0
759	TOP2A	DNA topoisomerase 2-alpha	1277			VEAKEKQDEQVGLPGKGGKAKGKKTQMAEVL	_(gl)QDEQVGLPGK(gl)GGK_	1	76.588	0.00074753	0.6787	4869500	0
760	TOP2A	DNA topoisomerase 2-alpha	521			KKCSAVKHNRIKGIPKLDDANDAGGRNSTEC	_GIPK(gl)LDDANDAGGRNSTE_	1	40.756	0.0131748	0.99967	429560	0
761	TOP2B;TOP2B	DNA topoisomerase 2-beta	1271	0.719908		KLLKKKKGDLDTAAVKVEFDEEFSGAPVEGA	_KKGDLDTAAVK(gl)VE_	1	133.16	3.19e-07	0.10517	35604000	13230000
762	TOP2B;TOP2B	DNA topoisomerase 2-beta;DNA topoisomerase 2	373			LIEVVKKKNKAGVSVKPFQVKNHIWVFINCL	_AGVSVK(gl)PFQVK_	1	43.419	0.0315356	-1.2268	1498300	0
763	TOP2B;TOP2B	DNA topoisomerase 2-beta	1299			EGAGEEALTPSVPINKGPKPKREKKEPGTRV	_ALTPSVPINK(gl)GPK_	1	40.725	0.02659	-0.44031	0	0
764	TOPORS	E3 ubiquitin-protein ligase Topors	950	1.8872		LQNEFLAPSLEPFETKDVVTIEAEFGVLDKE	_FLAPSLEPFETK(gl)D_	1	43.991	0.0293	-0.47845	421360	547800
765	TOR1AIP1;TOR1AIP1	Torsin-1A-interacting protein 1	474			RIDGTDKATQDSDTVKLEVDQELSNGFKNGQ	_ATQDSDTVK(gl)LE_	1	30.205	0.0270132	0.56459	0	0
766	TP53	Cellular tumor antigen p53	386	0.624844		SKKGQSTSRHKKLMFKTEGPDSD________	_LM(ox)FK(gl)TEGPDSD_	1	136.39	1.99e-10	-0.30259	83042000	24081000
767	TP53;TP53	Cellular tumor antigen p53;Cellular tumor antigen p53	319	0.328095		TKRALPNNTSSSPQPKKKPLDGEYFTLQIRG	_RALPNNTSSS(ph)PQPK(gl)K_	1	97.32	2.79e-05	0.26824	4412400	552410
768	TP53BP1;TP53BP1;TP53BP1;TP53BP1	Tumor suppressor p53-binding protein 1	1568	0.740528		SEDEYFSAGVVKGHRKESGELYYSIEKEGQR	_GHRK(gl)ESGELYYSIEK_	1	70.907	0.000683365	0.20399	2584900	828340
769	TP53BP1;TP53BP1;TP53BP1;TP53BP1	Tumor suppressor p53-binding protein 1	935			IPPLTGATPPLIGHLKLEPKRHSTPIGISNY	_EGDIIPPLTGATPPLIGHLK(gl)LEPK_	1	31.27	0.0298011	-0.64343	713530	0
770	TPI1	Triosephosphate isomerase	179	0.372812		CIGEKLDEREAGITEKVVFEQTKVIADNVKD	_LDEREAGITEK(gl)VVFEQTK_	1	78.794	2.57e-06	0.95726	7455300	2101000
771	TRA2A	Transformer-2 protein homolog alpha	29	0.343918		SRSQSKSPTGTPARVKSESRSGSRSPSRVSK	_S(ph)PTGTPARVK(gl)SE_	1	107.98	4.7e-05	-0.16019	3542100	608250
772	TRIM24	Transcription intermediary factor 1-alpha	723	0.503424		STHKVPVVMLEPIRIKQENSGPPENYDFPVV	_VPVVMLEPIRIK(gl)QE_	1	166.52	8.29e-16	-0.088065	25477000	7301900
773	TRIM24;TRIM24	Transcription intermediary factor 1-alpha	992	0.692869		AEFNEPDSEVANAGIKLENYFEELLKNLYPE	_VANAGIK(gl)LE_	1	86.18	0.00308481	-0.2511	1813600	670170
774	TRIM28	Transcription intermediary factor 1-beta	750	0.69193		GGTLDLTLIRARLQEKLSPPYSSPQEFAQDV	_K(gl)LSPPYSSPQEFAQDVGRM(ox)FK_	1	148.62	6.63e-24	0.064022	504800000	60444000
775	TRIM28	Transcription intermediary factor 1-beta	779	0.599831		DVGRMFKQFNKLTEDKADVQSIIGLQRFFET	_LTEDK(gl)ADVQSIIGLQRFFETRM(ox)NEAFGDTK_	1	155.22	5.56e-42	-0.039913	382900000	123350000
776	TRIM28	Transcription intermediary factor 1-beta	484	0.577867		KRSRSGEGEVSGLMRKVPRVSLERLDLDLTA	_VSGLM(ox)RK(gl)VPRVSLE_	1	39.509	0.0244218	-0.35352	645890	136570
777	TRIM28	Transcription intermediary factor 1-beta	507	0.441007		RLDLDLTADSQPPVFKVFPGSTTEDYNLIVI	_RLDLDLTADSQPPVFK(gl)VFPGSTTE_	1	41.904	0.00338635	0.17714	1964500	439800
778	TRIM28	Transcription intermediary factor 1-beta	575	0.397847		AAIGAPPTATEGPETKPVLMALAEGPGAEGP	_TK(gl)PVLMALAE_	1	69.979	0.00776989	-0.20776	100700000	13708000
779	TRIM28	Transcription intermediary factor 1-beta	554	0.319822		AGTPGAPPLAGMAIVKEEETEAAIGAPPTAT	_RGAAAAATGQPGTAPAGTPGAPPLAGM(ox)AIVK(gl)EEETE_	1	62.302	1.1e-11	0.51485	497930000	54413000
780	TRIM28	Transcription intermediary factor 1-beta	469	0.291801		GDDPYSSAEPHVSGVKRSRSGEGEVSGLMRK	_GYGFGSGDDPYSSAEPHVSGVK(gl)RS(ph)RSGEGE_	1	127.95	4.64e-22	-0.098715	15015000	2759000
781	TRIM28	Transcription intermediary factor 1-beta	774			QEFAQDVGRMFKQFNKLTEDKADVQSIIGLQ	_(gl)QFNK(gl)LTEDK_	1	108.72	1.2e-05	-0.67429	8747400	0
782	TRIM28	Transcription intermediary factor 1-beta	804			QRFFETRMNEAFGDTKFSAVLVEPPPMSLPG	_TK(gl)FSAVLVEPPPM(ox)SLPGAGLSSQE_	1	87.052	1.45e-30	0.106	37341000	0
783	TRIM28	Transcription intermediary factor 1-beta	261			EDAVRNQRKLLASLVKRLGDKHATLQKSTKE	_LLASLVK(gl)RLGDK_	1	53.136	0.0288723	-0.49984	0	0
784	TRIM33;TRIM33;TRIM33	E3 ubiquitin-protein ligase TRIM33	793	0.998275		EPGTEDEICSFSGGVKQEKTEDGRRSACMLS	_ICSFSGGVK(gl)QEK_	1	82.663	0.000252878	1.0494	3348800	1392100
785	TRIM49;TRIM49L2;TRIM49L2;TRIM49	Tripartite motif-containing protein 49;Tripartite motif-containing protein 49-like protein 2	65			VQCSECTKSTEQINLKTNIHLKKMASLARKV	_STEQINLK(gl)TNIHLK_	1	58.274	0.00939745	0.68229	4021300	0
786	TRIM49L1	Tripartite motif-containing protein 49-like protein 1;Tripartite motif-containing protein LOC642612	65	0.486215		TQCFECLKTTQQRNLKTNIRLKKMASRARKA	_TTQQRNLK(gl)TNIRLK_	1	96.464	0.00011149	0.33017	3523200	783080
787	TRPS1;TRPS1	Zinc finger transcription factor Trps1	1214	0.695918		KAPPNVKNEGPLNVVKTEKVDRSTQDELSTK	_NEGPLNVVK(gl)TEK_	1	109.44	3.65e-07	-0.081542	2907500	1436600
788	TSR1	Pre-rRNA-processing protein TSR1 homolog	346	0.507241		TDAVDDMEEGLKVLMKADPGRQESLQAEVIP	_VLM(ox)K(gl)ADPGRQE_	1	57.164	0.00228554	0.58332	2528100	564780
789	TTN	Titin	6668			GSDSCTTMLLVTEPPKFVKKLEASKIVKAGD	_(gl)EPPK(gl)FVK(gl)KLE_	0.905431	30.55	0.0355892	-0.24533	6176600	0
790	TUBA1C;TUBA1B;TUBA1A;TUBA1C;TUBA1A;TUBA3C;TUBA3E;TUBA1A	Tubulin alpha-1B chain;Tubulin alpha-1A chain;Tubulin alpha-1C chain;Tubulin alpha-3C/D chain;Tubulin alpha-3E chain	406	0.403861		GDVVPKDVNAAIATIKTKRTIQFVDWCPTGF	_DVNAAIATIK(gl)TK_	1	142.57	4.14e-16	-0.22156	9193000	1433900
791	TUBA1C;TUBA1B;TUBA1A;TUBA1C;TUBA1A;TUBA4A;TUBA4A;TUBA1B;TUBA1A;TUBA4A;TUBA4A;TUBA4A;TUBA1C;TUBA4A;TUBA1A;TUBA1B;TUBA1B;TUBA1B	Tubulin alpha-1B chain;Tubulin alpha-1A chain;Tubulin alpha-1C chain;Tubulin alpha-4A chain	130	0.383666		GDDSFNTFFSETGAGKHVPRAVFVDLEPTVI	_TGAGK(gl)HVPRAVFVDLEPTVIDE_	1	72.771	1.98e-07	0.18434	4338400	624480
792	TUBB4B	Tubulin beta-4B chain	58	0.485063		QLERINVYYNEATGGKYVPRAVLVDLEPGTM	_ATGGK(gl)YVPRAVLVDLE_	1	66.965	0.000202039	0.39378	3967900	983650
793	TYMS;TS;TS	Thymidylate synthase;Thymidylate synthase	308			AEDFQIEGYNPHPTIKMEMAV__________	_AEDFQIEGYNPHPTIK(gl)M(ox)EM(ox)AV_	1	41.136	0.00543784	0.10572	13428000	0
794	U2SURP;U2SURP;U2SURP;U2SURP	U2 snRNP-associated SURP motif-containing protein	822	10.0467		QSSKSEEHHLYSNPIKEEMTESKFSKYSEMS	_HHLYSNPIK(gl)EE_	1	33.088	0.0345	-0.43736	5700400	27032000
795	UBA2;UBA2	SUMO-activating enzyme subunit 2	257	2.15226		EWAKSTGYDPVKLFTKLFKDDIRYLLTMDKL	_LFTK(gl)LFK_	1	119.62	3.15e-05	0.08823	33090000	35229000
796	UBA2;UBA2	SUMO-activating enzyme subunit 2	316	1.38021		NEPQLGLKDQQVLDVKSYARLFSKSIETLRV	_DQQVLDVK(gl)SYARLFSK_	1	71.558	0.000263115	0.1778	1748400	1008200
797	UBA2;UBA2	SUMO-activating enzyme subunit 2	236	1.26777		EAEARARASNEDGDIKRISTKEWAKSTGYDP	_ARARASNEDGDIK(gl)RISTK_	1	127.28	7.08e-16	0.37951	6084600	2617700
798	UBA2;UBA2	SUMO-activating enzyme subunit 2	152	0.683827		IESGTAGYLGQVTTIKKGVTECYECHPKPTQ	_SGTAGYLGQVTTIK(gl)K_	1	88.561	1.86e-06	0.27133	5544500	2147000
799	UBC;UBC;UBC;UBC;UBB;UBC;UBC;RPS27A;UBC;UBB;UBC;UBC;UBC;UBC;UBA52;UBC	Polyubiquitin-C;Ubiquitin;Polyubiquitin-B;Ubiquitin;Ubiquitin-40S ribosomal protein S27a;Ubiquitin;40S ribosomal protein S27a;Ubiquitin-60S ribosomal protein L40;Ubiquitin;60S ribosomal protein L40	63	3.17071		KQLEDGRTLSDYNIQKESTLHLVLRLRGGMQ	_DGRTLSDYNIQK(gl)E_	1	121.45	2.82e-06	0.036913	71220000	124910000
800	UBC;UBC;UBC;UBC;UBB;UBC;UBC;RPS27A;UBC;UBB;UBC;UBC;UBC;UBC;UBA52;UBC;UBC;UBC	Polyubiquitin-C;Ubiquitin;Polyubiquitin-B;Ubiquitin;Ubiquitin-40S ribosomal protein S27a;Ubiquitin;40S ribosomal protein S27a;Ubiquitin-60S ribosomal protein L40;Ubiquitin;60S ribosomal protein L40	11	1.71347		_____MQIFVKTLTGKTITLEVEPSDTIENV	_TLTGK(gl)TITLEVEPSDTIENVK_	1	165.19	5.39e-23	-0.035295	64445000	65966000
801	UBC;UBC;UBC;UBC;UBB;UBC;UBC;RPS27A;UBC;UBB;UBC;UBC;UBC;UBC;UBA52;UBC;UBC;UBC	Polyubiquitin-C;Ubiquitin;Polyubiquitin-B;Ubiquitin;Ubiquitin-40S ribosomal protein S27a;Ubiquitin;40S ribosomal protein S27a;Ubiquitin-60S ribosomal protein L40;Ubiquitin;60S ribosomal protein L40	6	1.28082		__________MQIFVKTLTGKTITLEVEPSD	_MQIFVK(gl)TLTGK_	1	92.939	0.00129121	-0.61134	4525900	3039800
802	UBC;UBC;UBC;UBC;UBB;UBC;UBC;RPS27A;UBC;UBB;UBC;UBC;UBC;UBC;UBA52;UBC;UBC;UBC	Polyubiquitin-C;Ubiquitin;Polyubiquitin-B;Ubiquitin;Ubiquitin-40S ribosomal protein S27a;Ubiquitin;40S ribosomal protein S27a;Ubiquitin-60S ribosomal protein L40;Ubiquitin;60S ribosomal protein L40	48	0.714406		KEGIPPDQQRLIFAGKQLEDGRTLSDYNIQK	_EGIPPDQQRLIFAGK(gl)QLE_	1	40.844	0.0140707	-0.1952	5008100	1764900
803	UBC;UBC;UBC;UBC;UBB;UBC;UBC;RPS27A;UBC;UBB;UBC;UBC;UBC;UBC;UBA52;UBC;UBC;UBC	Polyubiquitin-C;Ubiquitin;Polyubiquitin-B;Ubiquitin;Ubiquitin-40S ribosomal protein S27a;Ubiquitin;40S ribosomal protein S27a;Ubiquitin-60S ribosomal protein L40;Ubiquitin;60S ribosomal protein L40	27			TITLEVEPSDTIENVKAKIQDKEGIPPDQQR	_TITLEVEPSDTIENVK(gl)AK_	1	32.926	0.0364229	0.64428	1041600	0
804	UBE2D1;UBE2D4;UBE2D4;UBE2D4;UBE2D4;UBE2D4;UBE2D4	Ubiquitin-conjugating enzyme E2 D1;Ubiquitin-conjugating enzyme E2 D4	4	0.348375		____________MALKRIQKELSDLQRDPPA	_(ac)ALK(gl)RIQK_	1	72.879	0.00280331	0.81647	1428900	212380
805	UBE2K;UBE2K;UBE2K;UBE2K	Ubiquitin-conjugating enzyme E2 K	10	0.564923		______MANIAVQRIKREFKEVLKSEETSKN	_(ac)ANIAVQRIK(gl)RE_	1	72.958	0.00179155	-1.0679	574710	88445
806	UBE2S	Ubiquitin-conjugating enzyme E2 S	197			PGAPGGPGGAEGPMAKKHAGERDKKLAAKKK	_ASSTDPGAPGGPGGAEGPM(ox)AK(gl)K_	1	52.09	0.000568216	-0.098667	2468400	0
807	UBR7;UBR7	Putative E3 ubiquitin-protein ligase UBR7	274	0.495384		PCAGSSSESDLQTVFKNESLNAESKSGCKLQ	_SDLQTVFK(gl)NE_	1	76.843	0.00265378	0.32412	4092600	947950
808	UBR7;UBR7	Putative E3 ubiquitin-protein ligase UBR7	252			KEDVPEQGKDDVREVKVEQNSEPCAGSSSES	_VK(gl)VEQNSEPCAGSSSE_	1	45.33	0.00680578	0.99026	685580	0
809	UBXN1;UBXN1	UBX domain-containing protein 1	293	0.609171		LQELGLVPSAVLIVAKKCPS___________	_LGLVPSAVLIVAK(gl)K_	1	49.31	0.00170733	0.21605	836550	270120
810	UBXN1;UBXN1;UBXN1	UBX domain-containing protein 1	83	0.536775		EQGGLEGSGSAAGEGKPALSEEERQEQTKRM	_GK(gl)PALSEEE_	1	81.95	0.0106059	0.40644	3182900	841930
811	UBXN7;UBXN7;UBXN7	UBX domain-containing protein 7	84	0.515429		VRPHTEEEVRAPIPQKQEILVEPEPLFGAPK	_VRAPIPQK(gl)QE_	1	48.981	0.00548431	0.39298	3175100	770640
812	UCHL1;UCHL1	Ubiquitin carboxyl-terminal hydrolase isozyme L1	195			PFPVNHGASSEDTLLKDAAKVCREFTEREQG	_DTLLK(gl)DAAK_	1	105.03	0.000108241	0.10271	3728800	0
813	UCHL1;UCHL1;UCHL1;UCHL1	Ubiquitin carboxyl-terminal hydrolase isozyme L1	71			TAQHENFRKKQIEELKGQEVSPKVYFMKQTI	_(gl)QIEELK(gl)GQEVSPK_	1	105	3.17e-05	0.5736	1850200	0
814	UCHL1;UCHL1;UCHL1;UCHL1	Ubiquitin carboxyl-terminal hydrolase isozyme L1	78			RKKQIEELKGQEVSPKVYFMKQTIGNSCGTI	_GQEVSPK(gl)VYFM(ox)K_	1	55.213	0.0129553	-0.21151	2099000	0
815	UHRF1	E3 ubiquitin-protein ligase UHRF1	683			GPSRAGSPRRTSKKTKVEPYSLTAQQSSLIR	_TK(gl)VEPYSLTAQQSSLIRE_	1	81.723	0.00101471	1.1574	976090	0
816	USP39;USP39;USP39;USP39;USP39	U4/U6.U5 tri-snRNP-associated protein 2	73	1.17266		SAREAPASVVPFVRVKREREVDEDSEPEREV	_REFEPASAREAPASVVPFVRVK(gl)RE_	1	166.34	5.26e-28	0.066826	105070000	70049000
817	UTP11L;UTP11L	Probable U3 small nucleolar RNA-associated protein 11	7			_________MAAAFRKAAKSRQREHRERSQP	_(ac)AAAFRK(gl)AAK_	1	43.897	0.00815246	0.8038	0	0
818	UTP3	Something about silencing protein 10	408	0.357672		EENSTEEQALEDQNAKRAITYQIAKNRGLTP	_DQNAK(gl)RAITYQIAK_	1	60.937	0.012275	-0.16159	1130300	190080
819	VCP	Transitional endoplasmic reticulum ATPase	8			________MASGADSKGDDLSTAILKQKNRP	_(ac)ASGADSK(gl)GDDLSTAILK_	1	152.37	1.53e-262	1.767	0	0
820	VDAC1;VDAC1	Voltage-dependent anion-selective channel protein 1	53			GLEFTSSGSANTETTKVTGSLETKYRWTEYG	_TTK(gl)VTGSLE_	1	44.318	0.0273323	0.74622	1026100	0
821	WDR12	Ribosome biogenesis protein WDR12	13			___MAQLQTRFYTDNKKYAVDDVPFSIPAAS	_(ac)AQLQTRFYTDNK(gl)K_	1	66.533	0.00345287	0.1446	779480	0
822	WDR20	WD repeat-containing protein 20	139			AGQVQLIDPIKKETSKLFNEERLIDKSRVTC	_(gl)ETSK(gl)LFNEERLIDK_	1	35.054	0.0427826	0.80636	3249200	0
823	WDR5	WD repeat-containing protein 5	46	0.844825		VKPNYALKFTLAGHTKAVSSVKFSPNGEWLA	_FTLAGHTK(gl)AVSSVK_	1	86.641	1.17e-05	0.39102	3068200	1707400
824	WDR61;WDR61;WDR61;WDR61;WDR61	WD repeat-containing protein 61	10			______MTNQYGILFKQEQAHDDAIWSVAWG	_(ac)TNQYGILFK(gl)QE_	1	42.475	0.0154111	0.3432	768250	0
825	WIZ;WIZ	Protein Wiz	1523	0.500417		DGGERPLAASPPGTVKAEEHQRQNINKFERR	_AGRAADGGERPLAASPPGTVK(gl)AEE_	1	51.234	0.000511735	0.15256	3528900	840770
826	XRCC1;XRCC1	DNA repair protein XRCC1	176	0.629749		PSQKVTVTKLGQFRVKEEDESANSLRPGALF	_LGQFRVK(gl)EEDE_	1	66.004	0.00551269	0.037594	1638600	516100
827	XRCC5	X-ray repair cross-complementing protein 5	532	0.350059		NPPAEVTTKSQIPLSKIKTLFPLIEAKKKDQ	_SQIPLSK(gl)IK_	1	109.16	4.43e-06	-0.20451	21756000	2531700
828	XRCC5	X-ray repair cross-complementing protein 5	688			HFWEIVVQDGITLITKEEASGSSVTAEEAKK	_GITLITK(gl)EE_	1	84.615	0.0327814	0.40505	1243500	0
829	XRCC5	X-ray repair cross-complementing protein 5	543			IPLSKIKTLFPLIEAKKKDQVTAQEIFQDNH	_TLFPLIEAK(gl)K_	1	77.078	2.54e-11	-1.3229	0	0
830	XRCC5	X-ray repair cross-complementing protein 5	525			QHIWNMLNPPAEVTTKSQIPLSKIKTLFPLI	_VTTK(gl)SQIPLSK_	1	60.161	0.0182202	0.80306	2106500	0
831	XRCC6;XRCC6;XRCC6;XRCC6	X-ray repair cross-complementing protein 6	287	0.350123		GIYNLVQKALKPPPIKLYRETNEPVKTKTRT	_ALKPPPIK(gl)LYRETNEPVK_	0.999762	56.959	0.00520533	0.84776	6841000	809940
832	XRCC6;XRCC6;XRCC6;XRCC6	X-ray repair cross-complementing protein 6	556	0.313168		TKRKHDNEGSGSKRPKVEYSEEELKTHISKG	_RPK(gl)VEYSEEELK_	1	103.6	0.000122376	0.49337	19117000	2900300
833	XRCC6;XRCC6;XRCC6;XRCC6	X-ray repair cross-complementing protein 6	539			EFKELVYPPDYNPEGKVTKRKHDNEGSGSKR	_ELVYPPDYNPEGK(gl)VTK_	1	79.837	8.82e-06	1.7094	1293200	0
834	XRCC6;XRCC6;XRCC6;XRCC6	X-ray repair cross-complementing protein 6	443			TPPGFQLVFLPFADDKRKMPFTEKIMATPEQ	_IQVTPPGFQLVFLPFADDK(gl)RK_	1	69.922	3.72e-05	-0.60491	763950	0
835	XRCC6;XRCC6;XRCC6;XRCC6	X-ray repair cross-complementing protein 6	515			SGSKRPKVEYSEEELKTHISKGTLGKFTVPM	_VEYSEEELK(gl)THISK_	1	53.403	0.00799162	0.14787	0	0
836	YBX1;YBX1	Nuclease-sensitive element-binding protein 1	26			PAAPPAAPALSAADTKPGTTGSGAGSGGPGG	_TQQPPAAPPAAPALSAADTK(gl)PGTTGSGAGSGGPGGLTSAAPAGGDK_	1	45.269	3.22e-09	1.2033	2060800	0
837	YLPM1;YLPM1	YLP motif-containing protein 1	983			GTAVATSSLTADNDFKPVGIGLPHSENNQDK	_GGTAVATSSLTADNDFK(gl)PVGIGLPHSE_	1	35.94	0.00542978	0.46243	856590	0
838	YTHDC1	YTH domain-containing protein 1	96			NKRIVSTKGKSATEYKNEEYQRSERNKRLDA	_SATEYK(gl)NEEYQRSERNK_	1	66.965	0.000430146	0.9705	1108800	0
839	YY1	Transcriptional repressor protein YY1	158	1.60397		DDYIEQTLVTVAAAGKSGGGGSSSSGGGRVK	_QTLVTVAAAGK(gl)SGGGGSSSSGGGRVK_	1	114.21	8.64e-18	0.40066	2876700	1886200
840	YY1;YY1	Transcriptional repressor protein YY1	283	0.450028		IDLSDPKQLAEFARMKPRKIKEDDAPRTIAC	_(gl)QLAEFARM(ox)K(gl)PRK_	1	35.006	0.0177609	-0.33947	2811400	784920
841	YY1;YY1;YY1	Transcriptional repressor protein YY1	213	0.607443		ADPGNKKWEQKQVQIKTLEGEFSVTMWSSDE	_(gl)QVQIK(gl)TLE_	1	58.981	0.0184114	0.48268	2655100	874190
842	YY1;YY1;YY1	Transcriptional repressor protein YY1	183			GGGRVKKGGGKKSGKKSYLSGGAGAAGGGGA	_K(gl)SYLSGGAGAAGGGGADPGNK_	1	63.184	1.14e-18	2.4478	652450	0
843	YY1;ZFP42	Transcriptional repressor protein YY1;Zinc finger protein 42 homolog	339	0.820558		VHVCAECGKAFVESSKLKRHQLVHTGEKPFQ	_AFVESSK(gl)LK_	1	93.623	0.000306469	-0.3199	6471000	863040
844	ZBTB1	Zinc finger and BTB domain-containing protein 1	328	0.6222		SEEKSRAAERKRIIIKMEPEDIPTDELKDFN	_RIIIK(gl)M(ox)EPEDIPTDELK_	1	84.895	3.94e-12	0.76146	3871300	1235100
845	ZBTB1	Zinc finger and BTB domain-containing protein 1	265			YHRIVDIRDGKDSNIKAEFGEKDSSKTFSAQ	_DSNIK(gl)AEFGEK_	1	86.911	0.00183325	0.72044	1822000	0
846	ZBTB10	Zinc finger and BTB domain-containing protein 10	617	0.42495		MQPPVAYPEENTLLIKEEPDLDGALLSGPDG	_NTLLIK(gl)EEPDLD_	1	80.96	0.00208316	0.23252	6890700	2345800
847	ZBTB2	Zinc finger and BTB domain-containing protein 2	505	0.685661		DSEVTEPDHPVLASIKKEQETVLLD______	_VTEPDHPVLASIK(gl)K_	1	111.74	3.94e-07	-0.076806	9229300	3718700
848	ZBTB25	Zinc finger and BTB domain-containing protein 25	198	1.51458		QQRACPATQALEEHQKPPVSIKQERCDPESV	_EHQK(gl)PPVSIKQE_	0.794989	41.48	0.0395363	0.021912	2088000	1723300
849	ZBTB26	Zinc finger and BTB domain-containing protein 26	184	1.66952		SEDSMDMEDSDIQIVKVESIGDVSEVRSKKD	_DSDIQIVK(gl)VE_	1	96.171	0.00387	-0.16427	1816400	1507500
850	ZBTB3	Zinc finger and BTB domain-containing protein 3	355	0.809768		PSQAPAPAEAELVQVKVEAIVISDEETDVSD	_LVQVK(gl)VE_	1	48.561	0.0294093	0.379	5941900	1966700
851	ZBTB37	Zinc finger and BTB domain-containing protein 37	246	1.19107		GRSDDEVRVLGAVHIKTENLEEWLGPENQPS	_VRVLGAVHIK(gl)TE_	1	58.674	0.0014741	0.13034	2417700	1265300
852	ZBTB39	Zinc finger and BTB domain-containing protein 39	183	0.963047		ADRNYVLPSDAGGSYKEEEKNVASDANHSLH	_LRGGGDYLGADRNYVLPSDAGGSYK(gl)E_	1	53.089	0.000223096	0.59352	1223600	719530
853	ZBTB40;ZBTB40;ZBTB40	Zinc finger and BTB domain-containing protein 40	172	0.313467		PHSSPELAATPGGPVKAETEEAAHSVSQEMS	_LAATPGGPVK(gl)AE_	1	70.089	0.000228156	0.18913	2745100	322930
854	ZBTB5	Zinc finger and BTB domain-containing protein 5	330	0.657385		PEVGLGEKEHMRVVVKSEPLSSPEPQDEVSD	_HM(ox)RVVVK(gl)SEPLSSPEPQDE_	1	31.818	0.0208134	-1.3618	532100	95813
855	ZBTB9	Zinc finger and BTB domain-containing protein 9	286	0.640901		ELPAPPALPPKIFYIKQEPFEPKEEISGSGT	_IFYIK(gl)QEPFEPK_	1	134.98	5.8e-11	0.51964	65954000	20137000
856	ZBTB9	Zinc finger and BTB domain-containing protein 9	372	0.631988		GGGPGGAGQAVHGPVKLGGTPPADGKRFGCL	_ILSGGGGPGGAGQAVHGPVK(gl)LGGT(ph)PPADGK_	1	83.185	3.53e-09	-0.3285	2660800	682240
857	ZBTB9	Zinc finger and BTB domain-containing protein 9	311			ISGSGTQPGGAKEETKVFSGGDTEGNGELGF	_EETK(gl)VFSGGDTE_	1	44.543	0.0232742	0.76915	667510	0
858	ZC3H11A	Zinc finger CCCH domain-containing protein 11A	654			QTLEKRGKAKPKVNVKPSVVKVVSSPKLAPK	_VNVK(gl)PSVVK_	1	44.318	0.0204383	0.31474	2388700	0
859	ZC3H11A;ZC3H11A;ZC3H11A	Zinc finger CCCH domain-containing protein 11A	114	0.509821		KTVLPTVPESPEEEVKASQLSVQQNKLSVQS	_VK(gl)ASQLSVQQNK_	1	93.959	0.000170994	-0.26954	6560000	1227800
860	ZC3H11A;ZC3H11A;ZC3H11A	Zinc finger CCCH domain-containing protein 11A	140	0.325707		LSVQSNPSPQLRSVMKVESSENVPSPTHPPV	_LSVQSNPSPQLRSVMK(gl)VE_	1	68.129	3.85e-05	-0.22018	34317000	6102400
861	ZC3H11A;ZC3H11A;ZC3H11A	Zinc finger CCCH domain-containing protein 11A	178	0.285489		DEDDDDQFSEEGDETKTPTLQPTPEVHNGLR	_TK(gl)TPTLQPTPE_	1	99.215	0.000229904	0.42045	2963500	480760
862	ZC3H11A;ZC3H11A;ZC3H11A	Zinc finger CCCH domain-containing protein 11A	478			TKSMQEVHIKTLEEIKLEKALRVQQSSESST	_TLEEIK(gl)LEK_	1	132.5	5.82e-11	0.49641	2559600	0
863	ZCCHC12	Zinc finger CCHC domain-containing protein 12	328	0.20733		NSRAQFPSTSGGSGYKNNGPGEMRRARKRKH	_VLVIDSPHNSRAQFPSTSGGSGYK(gl)NNGPGE_	1	51.956	2.38e-05	-0.44214	5342300	291270
864	ZCCHC12;ZCCHC18	Zinc finger CCHC domain-containing protein 12;Putative zinc finger CCHC domain-containing protein 18	133	0.539163		KLVFGESESSVTAHGKFFNTLQAQGEKASLY	_SSVTAHGK(gl)FFNTLQAQGEK_	1	54.368	0.000206823	-0.40975	1600300	310410
865	ZEB1;ZEB1;ZEB1;ZEB1;ZEB1;ZEB1;ZEB1	Zinc finger E-box-binding homeobox 1	516	0.656617		TNSCKSEKLPEDLTVKSEKDKSFEGGVNDST	_LPEDLTVK(gl)SEK_	1	76.151	0.000945629	0.14725	3058100	877090
866	ZEB1;ZEB1;ZEB1;ZEB1;ZEB1;ZEB1;ZEB1	Zinc finger E-box-binding homeobox 1	494			SLEQPSQLQVVPQNLKKENPVATNSCKSEKL	_IIINYSLEQPSQLQVVPQNLK(gl)K_	1	70.99	1.01e-05	0.41576	3615200	0
867	ZEB1;ZEB1;ZEB1;ZEB1;ZEB1;ZEB1;ZEB1;ZEB1;ZEB1;ZEB1	Zinc finger E-box-binding homeobox 1	348	0.527307		IENKPLQEQLSVNQIKTEPVDYEFKPIVVAS	_QLSVNQIK(gl)TEPVDYE_	1	46.318	0.0115838	0.52382	3854000	1176400
868	ZFP106;ZFP106;ZFP106	Zinc finger protein 106 homolog	1504	1.86585		IPVSVAETQTVISSIKGSKNSSEISSEPGDD	_TQTVISSIK(gl)GSK_	1	40.025	0.0145	-0.52745	480380	475370
869	ZFP62;ZFP62;ZFP62;ZFP62	Zinc finger protein 62 homolog	82	1.05562		SIREAISKAKSTANIKTEQEGEASEKSLHLS	_STANIK(gl)TEQEGEASEK_	1	160.47	2.5e-19	0.24136	7335800	4020500
870	ZHX1;ZHX1	Zinc fingers and homeoboxes protein 1	454			ETKPATAAVPTSQSVKHETALVNPDSFGIRA	_PATAAVPTSQSVK(gl)HE_	1	55.885	0.00277611	0.83144	449190	0
871	ZKSCAN4	Zinc finger protein with KRAB and SCAN domains 4	26			LDAQSAEDQTGLLTVKVEKEEASALTAEVRA	_NAALDAQSAEDQTGLLTVK(gl)VEK_	1	74.584	7.53e-07	0.027653	3198300	0
872	ZMAT2	Zinc finger matrin-type protein 2	102			CVVKDSINFLDHINGKKHQRNLGMSMRVERS	_DSINFLDHINGK(gl)K_	1	59.261	0.00662966	1.1643	1202900	0
873	ZMIZ1	Zinc finger MIZ domain-containing protein 1	834	2.22732		TCSWRPVPIKSDLHIKDDPDGIPSKRFKTMS	_SDLHIK(gl)DDPDGIPSK_	1	98.391	2.02e-06	0.19754	6895300	6645600
874	ZMYM3;ZMYM3;ZMYM3	Zinc finger MYM-type protein 3	788			NSQSPESKPQTPSQTKVENSNTVRTPEENGN	_PQTPSQTK(gl)VE_	1	49.189	0.0249849	0.54397	912080	0
875	ZMYM4	Zinc finger MYM-type protein 4	250	0.631199		IGSELGNSFASNIRIKEEPLDDEYDKAMAPQ	_ESIGSELGNSFASNIRIK(gl)EEPLDDEYDK_	1	112.39	2.34e-14	0.24857	20516000	6975500
876	ZMYM4;ZMYM4	Zinc finger MYM-type protein 4	273	0.832756		YDKAMAPQQGLLDKIKDEPDNAQEYSHGQQQ	_IK(gl)DEPDNAQEYSHGQQQK_	1	113.77	6.26e-10	0.59216	24041000	11371000
877	ZMYND8;ZMYND8;ZMYND8;ZMYND8;ZMYND8;ZMYND8;ZMYND8	Protein kinase C-binding protein 1	593	0.393923		SAVKKKPKPTNPVEIKEELKSTSPASEKADP	_PTNPVEIK(gl)EELK_	1	142.32	3.94e-11	0.3468	4993000	1090000
878	ZNF148	Zinc finger protein 148	115	0.585181		LPQGLQYALNVPISVKQEITFTDVSEQLMRD	_RLPQGLQYALNVPISVK(gl)QE_	1	109.87	4.09e-11	0.12332	16004000	5543400
879	ZNF189	Zinc finger protein 189	67	0.99079		SLDVLNRDKDEEPTVKQEIEEIEEEVEPQGV	_DEEPTVK(gl)QE_	1	106.88	0.017574	-0.40488	4428100	2261100
880	ZNF189	Zinc finger protein 189	88	0.918863		IEEEVEPQGVIVTRIKSEIDQDPMGRETFEL	_VEPQGVIVTRIK(gl)SE_	1	111.02	2.2e-07	-0.01149	4862500	2374900
881	ZNF202;ZNF202;ZNF202	Zinc finger protein 202	22	2.38853		PEDQDLWEEEGILMVKLEDDFTCRPESVLQR	_GILMVK(gl)LE_	1	110.12	0.00853737	-0.1986	15238000	18208000
882	ZNF263	Zinc finger protein 263	17	1.08157		ASGPGSQEREGLLIVKLEEDCAWSQELPPPD	_GLLIVK(gl)LE_	1	51.346	0.0171075	-0.19904	969590	482940
883	ZNF263	Zinc finger protein 263	157	0.724812		EEPLPLETARESPSFKLEPMETERSPGPRLQ	_TARESPSFK(gl)LEPM(ox)ETE_	1	58.671	0.000312752	0.69413	1235500	172400
884	ZNF280C;ZNF280C	Zinc finger protein 280C	289	1.3037		SERPCDEDKTDSETGKLIMLVNEFYYGRHEG	_TGK(gl)LIM(ox)LVNE_	1	63.408	0.00274786	-0.041983	551610	319240
885	ZNF280C;ZNF280C	Zinc finger protein 280C	273	1.018		HCCPDMITKFLGVIVKSERPCDEDKTDSETG	_FLGVIVK(gl)SERPCDEDK_	1	160.81	1.52e-16	-0.45775	72857000	39920000
886	ZNF280C;ZNF280C	Zinc finger protein 280C	75	0.524918		NILNRGHSSSSSKGIKSEPHSPGIPEIFRTA	_GIK(gl)SEPHS(ph)PGIPE_	1	68.809	0.000397917	0.30402	23672000	6864200
887	ZNF280C;ZNF280C	Zinc finger protein 280C	174			PAIFREGMKNTSYVLKHPSTSKVNSVTPKKP	_NTSYVLK(gl)HPSTSK_	1	55.98	0.0111331	0.879	882990	0
888	ZNF282;ZNF282	Zinc finger protein 282	293	0.656809		GAEPLVPAQDASSQVKREDTLCVRGQRGLEE	_AGAEPLVPAQDASSQVK(gl)RE_	1	67.995	0.00013458	0.27386	380000	87835
889	ZNF292	Zinc finger protein 292	1722			KTSLESHTVLAPLTLKTENGDSQMMALNSCT	_SHTVLAPLTLK(gl)TE_	1	56.951	0.00833181	1.1237	963680	0
890	ZNF295;ZNF295;ZNF295	Zinc finger protein 295	40	0.659709		LKGQLCDVLLIVGDQKFRAHKNVLAASSEYF	_VLLIVGDQK(gl)FRAHK_	1	71.879	0.0182411	-0.013617	1152900	377030
891	ZNF296	Zinc finger protein 296	35	0.277898		NPDDEMEMQDLVIELKPEPDAQPQQAPRLGP	_LK(gl)PEPDAQPQQAPRLGPFS(ph)PK_	1	55.127	0.000133922	0.35195	4481000	435990
892	ZNF326	DBIRD complex subunit ZNF326	459	0.807678		ESVLTATSILNNPIVKARYERFVKGENPFEI	_SVLTATSILNNPIVK(gl)ARYE_	1	68.567	0.000245681	-0.62229	1046500	276140
893	ZNF326	DBIRD complex subunit ZNF326	442	0.362769		SPDHIKGKQAYKEQIKRESVLTATSILNNPI	_EQIK(gl)RESVLTATSILNNPIVK_	1	156.73	1.91e-17	0.56756	6913600	1029900
894	ZNF326	DBIRD complex subunit ZNF326	467	0.289051		ILNNPIVKARYERFVKGENPFEIQDHSQDQQ	_RFVK(gl)GENPFE_	1	75.088	0.00271761	-0.20228	5550800	811920
895	ZNF326	DBIRD complex subunit ZNF326	438			QHLKSPDHIKGKQAYKEQIKRESVLTATSIL	_(gl)QAYK(gl)EQIK_	1	74.962	0.0013618	1.1016	4222700	0
896	ZNF335	Zinc finger protein 335	819			AQRELGGTALQVAVVKSEDVEAGLASPGGQP	_LGGTALQVAVVK(gl)SEDVE_	1	32.191	0.0275	0.16337	2775300	0
897	ZNF444	Zinc finger protein 444	8	0.858046		________MEVAVPVKQEAEGLALDSPWHRF	_VAVPVK(gl)QE_	1	110.22	0.00968152	-0.34454	28199000	12310000
898	ZNF451		130	3.87654		NPLENQKNDQNNSDTKISETETLKSSQNFQT	_NDQNNSDTK(gl)ISETETLK_	1	129.11	1.36e-10	-0.42228	10915000	22672000
899	ZNF451;ZNF451	Zinc finger protein 451	288	6.76427		SGKNHFHQSFKLGDNKGIAHPISFPSFAKKL	_LGDNK(gl)GIAHPISFPSFAK_	1	139.46	4.71e-15	0.083052	5086300	22274000
900	ZNF451;ZNF451	Zinc finger protein 451	852	2.35185		ASHTERKLKQAINYSKSLDMEKGVENDLSYQ	_(gl)QAINYSK(gl)SLDM(ox)EK_	1	57.136	0.00072666	0.87664	464050	610890
901	ZNF451;ZNF451	Zinc finger protein 451	845	1.3548		LYKFTASASHTERKLKQAINYSKSLDMEKGV	_LK(gl)QAINYSK_	1	110.53	4.16e-06	0.39297	7101000	5081200
902	ZNF451;ZNF451	Zinc finger protein 451	706	1.17232		SIDYVFVSEKTETSIKTEDDFPVIETSNQLT	_TSIK(gl)TEDDFPVIE_	1	98.942	0.000384851	-0.25017	15871000	9053700
903	ZNF451;ZNF451	Zinc finger protein 451	832	1.1414		KPSVAHFGSEKSNLYKFTASASHTERKLKQA	_SNLYK(gl)FTASASHTERK_	1	142.32	5.21e-14	0.12269	12602000	6865700
904	ZNF451;ZNF451	Zinc finger protein 451	843	1.13098		SNLYKFTASASHTERKLKQAINYSKSLDMEK	_FTASASHTERK(gl)LK_	1	156.8	6.4e-279	-0.0025691	18846000	12742000
905	ZNF462	Zinc finger protein 462	20	1.2102		QCDGCDFRAPSYEDLKAHIQDVHTAFLQPTD	_DLK(gl)AHIQD_	1	86.114	0.00977885	0.27145	1379000	839280
906	ZNF498;ZNF498	Zinc finger protein 498	22			EMAEAPQQQLGIPVVKLEKELPWGRGREDPS	_M(ox)AEAPQQQLGIPVVK(gl)LEK_	1	65.47	0.000239449	-0.22554	1255700	0
907	ZNF579	Zinc finger protein 579	551	0.892762		QDHSAFEMEEEEVDSKAHLRGLGGLAS____	_VDSK(gl)AHLRGLGGLAS_	1	57.973	0.00121271	-0.16063	19435000	10091000
908	ZNF618;ZNF618;ZNF618	Zinc finger protein 618	239			RADPFDQGVVATDEVKEEPPEPFQKIGPKTG	_VK(gl)EEPPEPFQK_	1	43.501	0.0101	1.9346	0	0
909	ZNF622	Zinc finger protein 622	105			RHVELEKKAVQAVNRKVEMMNEKNLEKGLGV	_AVQAVNRK(gl)VEM(ox)M(ox)NEK_	1	58.723	0.00231417	1.0042	4670000	0
910	ZNF644	Zinc finger protein 644	346			ELQAVDSQKYALSKVKPESTDEDLESVDAFQ	_VK(gl)PESTDEDLE_	1	37.426	0.0230498	-0.90409	668060	0
911	ZNF646	Zinc finger protein 646	1157	0.547906		EGPGQAEVEKLQEELKVEPLEEVARVKEEVW	_LQEELK(gl)VEPLEEVARVK_	1	90.385	1.17e-06	0.89481	2006900	375910
912	ZNF687;ZNF687	Zinc finger protein 687	902	0.807934		EETAGKGAGGALLTPKTEPEELAVSQGGAAP	_GAGGALLTPK(gl)TEPEE_	1	119.39	1.56e-08	0.045335	40822000	18733000
913	ZNF711;ZNF711	Zinc finger protein 711	250			KEDGFGSEVIKVYIFKAEAEDDVEIGGTEIV	_VYIFK(gl)AEAEDDVE_	1	50.207	0.00414169	0.81004	857500	0
914	ZNF746	Zinc finger protein 746	189	1.03935		GSGPPVPAPDLLMQIKQEGELQLQEQQALGV	_LLM(ox)QIK(gl)QE_	1	57.047	0.0133357	0.013808	628050	407490
915	ZNF771;ZNF771	Zinc finger protein 771	24			EEEEEEMQEEMVLLVKGEEDEGEEKYEVVKL	_M(ox)VLLVK(gl)GEEDE_	1	33.685	0.0326758	0.58623	497950	0
916	ZNF783		274	0.66826		RVAPAGPEAGGGVAIKTEAQSEDEMTPERLF	_ARVAPAGPEAGGGVAIK(gl)TE_	1	97.271	2.02e-10	-0.032917	3424600	1102100
917	ZNF800	Zinc finger protein 800	476	0.810024		TSPSAAGGQQKTRKPKLSAGFDFKQLYCKLC	_PK(gl)LSAGFDFK_	1	85.845	0.000485036	-0.019465	9065700	3385000
918	ZNF800	Zinc finger protein 800	409	0.56552		EKGPNNTANSSEIKVKVEPADSVESSPPSIT	_VK(gl)VEPADSVESSPPSITHSPQNELK_	1	128.52	3.44e-22	0.44734	24046000	5486300
919	ZNF800;ZNF800	Zinc finger protein 800	132	0.597357		LEAIYPSVDKREYIIKLEPIETNQNAVFQYI	_YIIK(gl)LEPIE_	1	46.158	0.0194939	-0.16944	1419700	555630
920	ZNF827;ZNF827	Zinc finger protein 827	523	0.900823		ERTSQGGAGVSPLLVKEEPKEDNGLPTSFTL	_RTSQGGAGVSPLLVK(gl)EEPK_	1	64.954	0.000148184	0.76711	693700	283190
921	ZNHIT6	Box C/D snoRNA protein 1	79	0.195904		SGQRPEEIPMDLTVVKQEIIDWPGTEGRLAG	_GSGQRPEEIPM(ox)DLTVVK(gl)QE_	1	43.244	0.025839	-0.47091	4681300	262250
922	ZNHIT6	Box C/D snoRNA protein 1	162			MDWSEVKEEKDNLEIKQEEKFVGQCIKEELM	_DNLEIK(gl)QEEK_	1	141.89	6.44e-165	-0.25135	3437500	0
923	ZNHIT6	Box C/D snoRNA protein 1	118			DRPEVKDENAGVLEVKQETDSSLVVKEAKVG	_DENAGVLEVK(gl)QETDSSLVVK_	1	42.172	0.0032549	-0.42516	1020200	0
924	ZRSR2;ZRSR1	U2 small nuclear ribonucleoprotein auxiliary factor 35 kDa subunit-related protein 2;U2 small nuclear ribonucleoprotein auxiliary factor 35 kDa subunit-related protein 1	89	0.750273		EWLLREQKAQEEFRIKKEKEEAAKKRQEEQE	_AQEEFRIK(gl)K_	1	57.401	0.0211268	0.11138	1115700	335500
